# Supplementary material for: Visible-light-mediated direct difluoromethylation of alkynoates: synthesis of 3-difluoromethylated coumarins
Source: Royal Society of Chemistry journal article supplement (doi:10.1039/c7ob02366a), 2017-01-01

# Supporting Information

## Visible-light-mediated direct difluoromethylation of alkynoates: Synthesis of 3-difluoromethylated coumarins

Mei Zhu,<sup>b</sup> Weijun Fu,<sup>\*a</sup> Zhiqiang Wang,<sup>a</sup> Chen Xu,<sup>b</sup> and Baoming Ji,<sup>a</sup>

*<sup>a</sup>College of Chemistry and Chemical Engineering, and Henan Key Laboratory of  
Fuction-Oriented Porous Materials, Luoyang Normal University, Luoyang, Henan  
471022, P. R. China. E-mail: [wjfu@lynu.edu.cn](mailto:wjfu@lynu.edu.cn)*

*<sup>b</sup> College of Food and Drug, Luoyang Normal University, Luoyang, Henan 471022, P.  
R. China.*

### Table of contents

|                                                                                                            |       |
|------------------------------------------------------------------------------------------------------------|-------|
| General.....                                                                                               | 2     |
| General Procedures for Experiments and Analytical Data.....                                                | 2-13  |
| X-ray diffraction analysis of compound <b>3a</b> .....                                                     | 14    |
| The <sup>1</sup> H NMR, <sup>13</sup> C NMR and <sup>19</sup> F NMR Spectra of compounds <b>3a-z</b> ..... | 15-52 |

**General:** Solvents were purified or dried in a standard manner. Reactions were monitored by TLC on silica gel plates (GF254), and the analytical thin-layer chromatography (TLC) was performed on precoated, glass-backed silica gel plates. <sup>1</sup>H NMR, <sup>13</sup>C NMR and <sup>19</sup>F{<sup>1</sup>H} NMR spectra were recorded on a 500 MHz NMR spectrometers with TMS as an internal standard. Chemical shifts (δ) are reported in ppm downfield from tetramethylsilane. Abbreviations for signal couplings are: s, singlet; d, doublet; t, triplet; m, multiplet. HRMS analyses was recorded on Waters Q-TOF Global mass spectrometer. All of alkynoates **1** were synthesized according to the literature.<sup>1</sup>

### General experimental details

To a mixture of alkynoates **1** (0.20 mmol), 2-((difluoromethyl)sulfonyl)benzo[d]thiazole (0.30 mmol) and Na<sub>2</sub>CO<sub>3</sub> (0.30 mmol) in 2.0 mL of DMSO was added *fac*-Ir(ppy)<sub>3</sub> (0.004 mmol, 2.0 mol%) under N<sub>2</sub> atmosphere. The solution was stirred at room temperature under 5 W blue LED irradiation for 24 h. Then the reaction mixture was diluted by adding EtOAc and brine. The aqueous layer was extracted with EtOAc. The combined organic layer was dried over MgSO<sub>4</sub>, filtered and concentrated. The residue was purified by flash column chromatography (petroleum ether/ethyl acetate 20:1 as the eluant) on silica gel to give the desired products **3**.

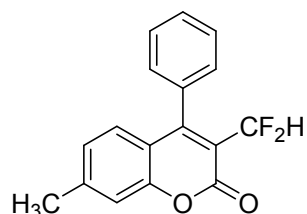

### **3-(difluoromethyl)-6-methyl-4-phenyl-2H-chromen-2-one (3a):**

<sup>1</sup>H NMR (500 MHz, CDCl<sub>3</sub>): δ 7.58-7.56 (m, 3 H), 7.34-7.33 (m, 2 H), 7.23 (s, 1 H), 7.05-6.99 (m, 2 H), 6.52 (t, 1 H, *J* = 53.5 Hz), 2.48 (s, 3 H). <sup>13</sup>C NMR (125 MHz, CDCl<sub>3</sub>): δ 158.19, 156.47 (t, *J* = 4.3 Hz), 153.76, 145.21, 131.89, 129.65, 128.70,

128.37, 128.28, 125.93, 117.11, 116.60 (t,  $J = 22.1$  Hz), 111.90 (t,  $J = 237.0$  Hz), 21.77.  $^{19}\text{F}$  NMR (470 MHz,  $\text{CDCl}_3$ ):  $\delta$  -114.56. HRMS (ESI): calcd for  $[\text{M}+\text{H}]^+$   $\text{C}_{17}\text{H}_{13}\text{F}_2\text{O}_2$ : 287.0883, found: 287.0880.

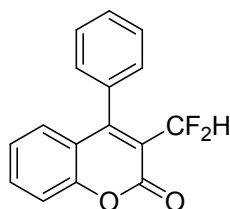

**3-(difluoromethyl)-4-phenyl-2H-chromen-2-one (3b):**

$^1\text{H}$  NMR (500 MHz,  $\text{CDCl}_3$ ):  $\delta$  7.64-7.61 (m, 1 H), 7.60-7.57 (m, 3 H), 7.43 (dd, 1 H,  $J_1 = 8.0$  Hz,  $J_2 = 1.0$  Hz), 7.36-7.34 (m, 2 H), 7.25-7.22 (m, 1 H), 7.13 (dd, 1 H,  $J_1 = 8.0$  Hz,  $J_2 = 1.5$  Hz), 6.53 (t, 1 H,  $J = 53.0$  Hz).  $^{13}\text{C}$  NMR (125 MHz,  $\text{CDCl}_3$ ):  $\delta$  157.89, 156.39 (t,  $J = 4.1$  Hz), 153.68, 133.46, 131.70, 129.74, 128.75, 128.58, 128.38, 124.66, 119.53, 117.82 (t,  $J = 22.1$  Hz), 117.02, 111.73 (t,  $J = 237.4$  Hz).  $^{19}\text{F}$  NMR (470 MHz,  $\text{CDCl}_3$ ):  $\delta$  -114.82. HRMS (ESI): calcd for  $[\text{M}+\text{H}]^+$   $\text{C}_{16}\text{H}_{11}\text{F}_2\text{O}_2$ : 273.0727, found: 273.0733.

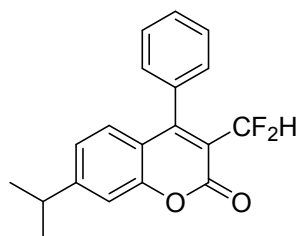

**3-(difluoromethyl)-7-isopropyl-4-phenyl-2H-chromen-2-one (3c):**

$^1\text{H}$  NMR (500 MHz,  $\text{CDCl}_3$ ):  $\delta$  7.58-7.55 (m, 3 H), 7.36-7.33 (m, 2 H), 7.27 (d, 1 H,  $J = 2.0$  Hz), 7.10 (dd, 1 H,  $J_1 = 10.0$  Hz,  $J_2 = 2.0$  Hz), 7.04 (d, 1 H,  $J = 10.5$  Hz), 6.53 (t, 1 H,  $J = 66.5$  Hz), 3.05-2.99 (m, 1 H), 1.30 (d, 6 H,  $J = 9.0$  Hz).  $^{13}\text{C}$  NMR (125 MHz,  $\text{CDCl}_3$ ):  $\delta$  158.24, 156.44 (t,  $J = 4.3$  Hz), 156.00, 153.96, 131.95, 129.62, 128.67, 128.47, 128.36, 124.42, 117.41, 116.67 (t,  $J = 22.1$  Hz), 114.56, 111.90 (t,  $J = 237.0$  Hz), 34.29, 23.50.  $^{19}\text{F}$  NMR (470 MHz,  $\text{CDCl}_3$ ):  $\delta$  -114.54. HRMS (ESI): calcd for  $[\text{M}+\text{H}]^+$   $\text{C}_{19}\text{H}_{17}\text{F}_2\text{O}_2$ : 315.1196, found: 315.1190.

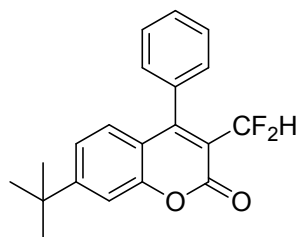

**7-(tert-butyl)-3-(difluoromethyl)-4-phenyl-2H-chromen-2-one (3d):**

$^1\text{H}$  NMR (500 MHz,  $\text{CDCl}_3$ ):  $\delta$  7.58-7.56 (m, 3 H), 7.43 (d, 1 H,  $J = 2.0$  Hz), 7.36-7.33 (m, 2 H), 7.27 (dd, 1 H,  $J_1 = 10.5$  Hz,  $J_2 = 2.5$  Hz), 7.05 (d, 1 H,  $J = 10.5$  Hz), 6.55 (t, 1 H,  $J = 66.5$  Hz), 1.37 (s, 9 H).  $^{13}\text{C}$  NMR (125 MHz,  $\text{CDCl}_3$ ):  $\delta$  158.35, 156.29 (t,  $J = 4.0$  Hz), 153.75, 131.96, 129.60, 128.65, 128.36, 128.10, 122.26, 117.05, 116.84, 116.66, 113.78, 111.87 (t,  $J = 237.1$  Hz), 35.38, 30.92.  $^{19}\text{F}$  NMR (470 MHz,  $\text{CDCl}_3$ ):  $\delta$  -114.52. HRMS (ESI): calcd for  $[\text{M}+\text{H}]^+$   $\text{C}_{20}\text{H}_{19}\text{F}_2\text{O}_2$ : 329.1353, found: 329.1359.

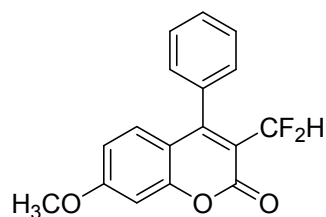

**3-(difluoromethyl)-7-methoxy-4-phenyl-2H-chromen-2-one (3e):**

$^1\text{H}$  NMR (500 MHz,  $\text{CDCl}_3$ ):  $\delta$  7.55-7.53 (m, 3 H), 7.32-7.30 (m, 2 H), 6.99 (d, 1 H,  $J = 11.0$  Hz), 6.87 (d, 1 H,  $J = 3.0$  Hz), 6.76 (dd, 1 H,  $J_1 = 11.0$  Hz,  $J_2 = 3.0$  Hz), 6.49 (t, 1 H,  $J = 67.0$  Hz), 3.89 (s, 3 H).  $^{13}\text{C}$  NMR (125 MHz,  $\text{CDCl}_3$ ):  $\delta$  164.12, 158.36, 156.58 (t,  $J = 4.0$  Hz), 155.69, 132.08, 129.69, 129.60, 128.67, 128.34, 114.46 (t,  $J = 22.1$  Hz), 113.05, 112.99, 112.07 (t,  $J = 236.0$  Hz), 100.66, 55.96.  $^{19}\text{F}$  NMR (470 MHz,  $\text{CDCl}_3$ ):  $\delta$  -114.18. HRMS (ESI): calcd for  $[\text{M}+\text{H}]^+$   $\text{C}_{17}\text{H}_{13}\text{F}_2\text{O}_3$ : 303.0883, found: 303.0876.

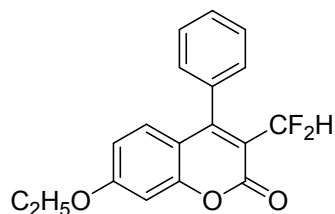

**3-(difluoromethyl)-7-ethoxy-4-phenyl-2H-chromen-2-one (3f):**

$^1\text{H}$  NMR (500 MHz,  $\text{CDCl}_3$ ):  $\delta$  7.55-7.53 (m, 3 H), 7.32-7.30 (m, 2 H), 6.98 (d, 1 H,  $J = 11.5$  Hz), 6.85 (d, 1 H,  $J = 3.0$  Hz), 6.74 (dd, 1 H,  $J_1 = 11.0$  Hz,  $J_2 = 3.0$  Hz), 6.49 (t, 1 H,  $J = 67.0$  Hz), 4.11 (q, 2 H,  $J = 9.0$  Hz), 1.46 (t, 3 H,  $J = 9.0$  Hz).  $^{13}\text{C}$  NMR (125 MHz,  $\text{CDCl}_3$ ):  $\delta$  163.51, 158.43, 156.59, 155.70, 132.15, 129.64, 129.55, 128.65, 128.34, 114.33 (t,  $J = 22.1$  Hz), 113.40, 112.84, 112.09 (t,  $J = 236.6$  Hz), 101.09, 64.44, 14.47.  $^{19}\text{F}$  NMR (470 MHz,  $\text{CDCl}_3$ ):  $\delta$  -114.12. HRMS (ESI): calcd for  $[\text{M}+\text{H}]^+$   $\text{C}_{18}\text{H}_{15}\text{F}_2\text{O}_3$ : 317.0989, found: 317.0981.

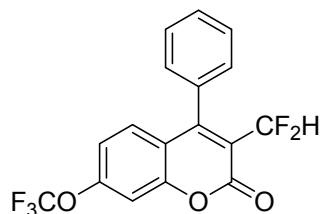

**3-(difluoromethyl)-4-phenyl-7-(trifluoromethoxy)-2H-chromen-2-one (3g):**

$^1\text{H}$  NMR (500 MHz,  $\text{CDCl}_3$ ):  $\delta$  7.61-7.59 (m, 3 H), 7.36-7.34 (m, 2 H), 7.293-7.289 (m, 1 H), 7.18 (d, 1 H,  $J = 9.0$  Hz), 7.08 (dd, 1 H,  $J_1 = 9.0$  Hz,  $J_2 = 1.0$  Hz), 6.53 (t, 1 H,  $J = 53.0$  Hz).  $^{13}\text{C}$  NMR (125 MHz,  $\text{CDCl}_3$ ):  $\delta$  157.22, 155.53 (t,  $J = 4.1$  Hz), 154.38, 152.46, 131.27, 130.23, 130.02, 128.92, 128.28, 120.20 (q,  $J = 258.6$  Hz), 117.93, 117.83 (t,  $J = 22.3$  Hz), 116.72, 111.47 (t,  $J = 237.9$  Hz), 108.85.  $^{19}\text{F}$  NMR (470 MHz,  $\text{CDCl}_3$ ):  $\delta$  -57.74 (s, 3 F), -114.88 (s, 2 F). HRMS (ESI): calcd for  $[\text{M}+\text{H}]^+$   $\text{C}_{17}\text{H}_{10}\text{F}_5\text{O}_3$ : 357.0550, found: 357.0555.

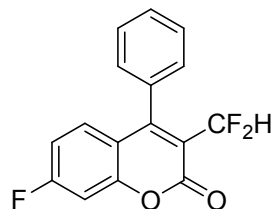

**3-(difluoromethyl)-7-fluoro-4-phenyl-2H-chromen-2-one (3h):**

$^1\text{H}$  NMR (500 MHz,  $\text{CDCl}_3$ ):  $\delta$  7.60-7.58 (m, 3 H), 7.35-7.33 (m, 2 H), 7.15-7.12 (m, 2 H), 6.97 (td, 1 H,  $J_1 = 8.5$  Hz,  $J_2 = 2.5$  Hz), 6.50 (t, 1 H,  $J = 53.0$  Hz).  $^{13}\text{C}$  NMR (125 MHz,  $\text{CDCl}_3$ ):  $\delta$  165.42 (d,  $J = 255.6$  Hz), 157.48, 155.95 (t,  $J = 4.1$  Hz), 154.93 (d,  $J = 13.1$  Hz), 131.50, 130.62 (d,  $J = 10.4$  Hz), 129.93, 128.88, 128.29, 116.73 (td,  $J_1 = 22.4$  Hz,  $J_2 = 2.9$  Hz), 116.30 (d,  $J = 2.5$  Hz), 112.91 (d,  $J = 22.5$  Hz), 111.65 (t,  $J = 237.5$  Hz), 104.50 (t,  $J = 25.5$  Hz).  $^{19}\text{F}$  NMR (470 MHz,  $\text{CDCl}_3$ ):  $\delta$  -102.34 (s, 1 F), -114.81 (s, 2 F). HRMS (ESI): calcd for  $[\text{M}+\text{H}]^+$   $\text{C}_{16}\text{H}_{10}\text{F}_3\text{O}_2$ : 291.0633, found: 291.0637.

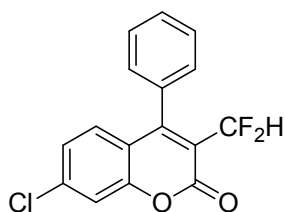

**7-chloro-3-(difluoromethyl)-4-phenyl-2H-chromen-2-one (3i):**

$^1\text{H}$  NMR (500 MHz,  $\text{CDCl}_3$ ):  $\delta$  7.61-7.58 (m, 3 H), 7.44 (d, 1 H,  $J = 2.0$  Hz), 7.34-7.33 (m, 2 H), 7.20 (dd, 1 H,  $J_1 = 9.0$  Hz,  $J_2 = 2.5$  Hz), 7.07 (d, 1 H,  $J = 9.0$  Hz), 6.52 (t, 1 H,  $J = 54.5$  Hz).  $^{13}\text{C}$  NMR (125 MHz,  $\text{CDCl}_3$ ):  $\delta$  157.26, 155.73 (t,  $J = 4.3$  Hz), 153.87, 139.67, 131.32, 129.96, 129.50, 128.89, 128.30, 125.30, 118.19, 117.75 (t,  $J = 22.3$  Hz), 117.27, 111.52 (t,  $J = 237.8$  Hz).  $^{19}\text{F}$  NMR (470 MHz,  $\text{CDCl}_3$ ):  $\delta$  -114.79. HRMS (ESI): calcd for  $[\text{M}+\text{H}]^+$   $\text{C}_{16}\text{H}_{10}\text{ClF}_2\text{O}_2$ : 307.0337, found: 307.0332.

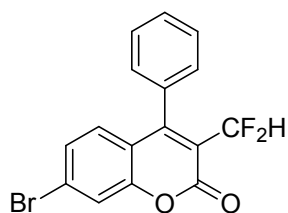

**7-bromo-3-(difluoromethyl)-4-phenyl-2H-chromen-2-one (3j):**

$^1\text{H}$  NMR (500 MHz,  $\text{CDCl}_3$ ):  $\delta$  7.61-7.59 (m, 4 H), 7.37-7.32 (m, 3 H), 6.99 (d, 1 H,  $J = 8.5$  Hz), 6.52 (t, 1 H,  $J = 53.0$  Hz).  $^{13}\text{C}$  NMR (125 MHz,  $\text{CDCl}_3$ ):  $\delta$  157.20, 155.79 (t,  $J = 4.3$  Hz), 153.75, 131.27, 129.96, 129.55, 128.89, 128.30, 128.16, 127.83, 120.26, 118.56, 117.98 (t,  $J = 22.3$  Hz), 111.52 (t,  $J = 237.9$  Hz).  $^{19}\text{F}$  NMR (470 MHz,  $\text{CDCl}_3$ ):  $\delta$  -114.84. HRMS (ESI): calcd for  $[\text{M}+\text{H}]^+$   $\text{C}_{16}\text{H}_{10}\text{BrF}_2\text{O}_2$ : 350.9832, found: 350.9837.

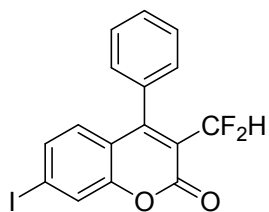

**3-(difluoromethyl)-7-iodo-4-phenyl-2H-chromen-2-one (3k):**

$^1\text{H}$  NMR (500 MHz,  $\text{CDCl}_3$ ):  $\delta$  7.79 (d, 1 H,  $J = 1.0$  Hz), 7.57-7.53 (m, 4 H), 7.31-7.30 (m, 2 H), 6.79 (d, 1 H,  $J = 8.5$  Hz), 6.49 (t, 1 H,  $J = 53.0$  Hz).  $^{13}\text{C}$  NMR (125 MHz,  $\text{CDCl}_3$ ):  $\delta$  157.11, 155.91 (t,  $J = 4.4$  Hz), 153.33, 134.02, 131.22, 129.95, 129.40, 128.89, 128.30, 126.16, 119.08, 118.26 (t,  $J = 22.3$  Hz), 111.53 (t,  $J = 237.8$  Hz), 99.75.  $^{19}\text{F}$  NMR (470 MHz,  $\text{CDCl}_3$ ):  $\delta$  -114.86. HRMS (ESI): calcd for  $[\text{M}+\text{H}]^+$   $\text{C}_{16}\text{H}_{10}\text{F}_2\text{IO}_2$ : 398.9693, found: 398.9698.

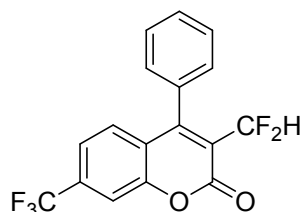

**3-(difluoromethyl)-4-phenyl-7-(trifluoromethyl)-2H-chromen-2-one (3l):**

$^1\text{H}$  NMR (500 MHz,  $\text{CDCl}_3$ ):  $\delta$  7.68 (s, 1 H), 7.62-7.60 (m, 3 H), 7.47 (dd, 1 H,  $J_1 = 8.0$  Hz,  $J_2 = 1.0$  Hz), 7.36-7.35 (m, 2 H), 7.29 (s, 1 H), 6.56 (t, 1 H,  $J = 53.0$  Hz).  $^{13}\text{C}$  NMR (125 MHz,  $\text{CDCl}_3$ ):  $\delta$  156.93, 155.21 (t,  $J = 4.0$  Hz), 153.29, 134.88 (q,  $J = 33.5$  Hz), 130.96, 130.15, 129.51, 129.01, 128.29, 122.89 (q,  $J = 271.4$  Hz), 122.17, 121.89 (q,  $J = 3.4$  Hz), 119.79 (t,  $J = 22.4$  Hz), 114.46 (q,  $J = 4.0$  Hz), 111.26 (t,  $J = 238.4$  Hz).  $^{19}\text{F}$  NMR (470 MHz,  $\text{CDCl}_3$ ):  $\delta$  -63.17 (s, 3 F), -115.16 (s, 2 F). HRMS (ESI): calcd for  $[\text{M}+\text{H}]^+$   $\text{C}_{17}\text{H}_{10}\text{F}_5\text{O}_2$ : 341.0601, found: 341.0594.

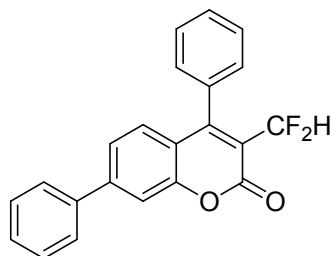

**3-(difluoromethyl)-4,7-diphenyl-2H-chromen-2-one (3m):**

$^1\text{H}$  NMR (500 MHz,  $\text{CDCl}_3$ ):  $\delta$  7.66-7.59 (m, 6 H), 7.54-7.45 (m, 4 H), 7.40-7.38 (m, 2 H), 7.19 (d, 1 H,  $J = 10.5$  Hz), 6.57 (t, 1 H,  $J = 66.5$  Hz).  $^{13}\text{C}$  NMR (125 MHz,  $\text{CDCl}_3$ ):  $\delta$  158.08, 156.20, 154.10, 146.65, 138.64, 131.80, 129.74, 129.21, 128.97, 128.93, 128.77, 128.40, 127.27, 123.47, 118.42, 117.33 (t,  $J = 22.1$  Hz), 115.03, 111.79 (t,  $J = 237.4$  Hz).  $^{19}\text{F}$  NMR (470 MHz,  $\text{CDCl}_3$ ):  $\delta$  -114.55. HRMS (ESI): calcd for  $[\text{M}+\text{H}]^+$   $\text{C}_{22}\text{H}_{15}\text{F}_2\text{O}_2$ : 349.1040, found: 349.1046.

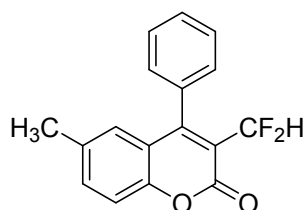

**3-(difluoromethyl)-6-methyl-4-phenyl-2H-chromen-2-one (3n):**

$^1\text{H}$  NMR (500 MHz,  $\text{CDCl}_3$ ):  $\delta$  7.60-7.57 (m, 3 H), 7.43 (dd, 1 H,  $J_1 = 10.5$  Hz,  $J_2 = 2.0$  Hz), 7.35-7.31 (m, 3 H), 6.87 (s, 1 H), 6.52 (t, 1 H,  $J = 67.0$  Hz), 2.31 (s, 3 H).  $^{13}\text{C}$  NMR (125 MHz,  $\text{CDCl}_3$ ):  $\delta$  158.11, 156.39 (t,  $J = 4.1$  Hz), 151.84, 134.54, 134.49, 131.82, 129.66, 128.72, 128.36, 128.15, 119.20, 117.68 (t,  $J = 22.0$  Hz), 116.77, 111.81 (t,  $J = 237.4$  Hz), 20.89.  $^{19}\text{F}$  NMR (470 MHz,  $\text{CDCl}_3$ ):  $\delta$  -114.78. HRMS (ESI): calcd for  $[\text{M}+\text{H}]^+$   $\text{C}_{17}\text{H}_{13}\text{F}_2\text{O}_2$ : 287.0883, found: 287.0881.

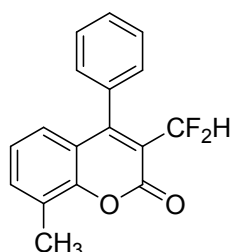

**3-(difluoromethyl)-8-methyl-4-phenyl-2H-chromen-2-one (3n'):**

$^1\text{H}$  NMR (500 MHz,  $\text{CDCl}_3$ ):  $\delta$  7.58-7.56 (m, 3 H), 7.47 (d, 1 H,  $J = 9.5$  Hz), 7.35-7.33 (m, 2 H), 7.12 (t, 1 H,  $J = 10.0$  Hz), 6.95 (d, 1 H,  $J = 9.5$  Hz), 6.55 (t, 1 H,  $J = 66.5$  Hz), 2.54 (s, 3 H).  $^{13}\text{C}$  NMR (125 MHz,  $\text{CDCl}_3$ ):  $\delta$  158.11, 156.70, 152.04, 134.70, 132.08, 129.58, 128.64, 128.39, 126.54, 126.31, 124.07, 119.32, 117.47 (t,  $J = 22.1$  Hz), 111.84 (t,  $J = 237.1$  Hz), 15.59.  $^{19}\text{F}$  NMR (470 MHz,  $\text{CDCl}_3$ ):  $\delta$  -114.78. HRMS (ESI): calcd for  $[\text{M}+\text{H}]^+$   $\text{C}_{17}\text{H}_{13}\text{F}_2\text{O}_2$ : 287.0883, found: 287.0889.



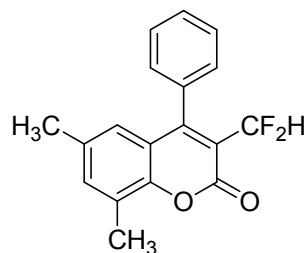

**3-(difluoromethyl)-6,8-dimethyl-4-phenyl-2H-chromen-2-one (3o):**

$^1\text{H}$  NMR (500 MHz,  $\text{CDCl}_3$ ):  $\delta$  7.56-7.55 (m, 3 H), 7.32-7.27 (m, 2 H), 7.19 (s, 1 H), 6.79 (s, 1 H), 6.49 (t, 1 H,  $J = 53.5$  Hz), 2.36 (s, 3 H), 2.17 (s, 3 H).  $^{13}\text{C}$  NMR (125 MHz,  $\text{CDCl}_3$ ):  $\delta$  158.40, 156.43, 152.13, 144.09, 133.59, 132.05, 129.55, 128.65, 128.36, 128.35, 117.52, 117.17, 116.60 (t,  $J = 22.1$  Hz), 111.95 (t,  $J = 236.9$  Hz), 20.33, 19.30.  $^{19}\text{F}$  NMR (470 MHz,  $\text{CDCl}_3$ ):  $\delta$  -114.77. HRMS (ESI): calcd for  $[\text{M}+\text{H}]^+$   $\text{C}_{18}\text{H}_{15}\text{F}_2\text{O}_2$ : 300.1040, found: 300.1046.

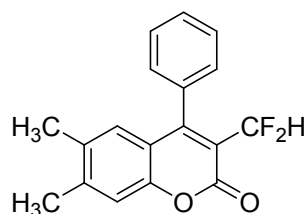

**3-(difluoromethyl)-6,7-dimethyl-4-phenyl-2H-chromen-2-one (3p):**

$^1\text{H}$  NMR (500 MHz,  $\text{CDCl}_3$ ):  $\delta$  7.56-7.55 (m, 3 H), 7.31-7.26 (m, 3 H), 6.67 (s, 1 H), 6.50 (t, 1 H,  $J = 53.5$  Hz), 2.47 (s, 3 H), 2.24 (s, 3 H).  $^{13}\text{C}$  NMR (125 MHz,  $\text{CDCl}_3$ ):  $\delta$  158.22, 156.69, 150.23, 135.93, 133.77, 132.19, 129.51, 128.61, 128.38, 126.18, 125.87, 119.03, 117.33 (t,  $J = 22.0$  Hz), 111.93 (t,  $J = 237.0$  Hz), 20.81, 15.49.  $^{19}\text{F}$  NMR (470 MHz,  $\text{CDCl}_3$ ):  $\delta$  -114.49. HRMS (ESI): calcd for  $[\text{M}+\text{H}]^+$   $\text{C}_{18}\text{H}_{15}\text{F}_2\text{O}_2$ : 300.1040, found: 300.1033.

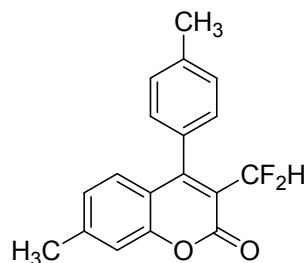

**3-(difluoromethyl)-7-methyl-4-(p-tolyl)-2H-chromen-2-one (3s):**

$^1\text{H}$  NMR (500 MHz,  $\text{CDCl}_3$ ):  $\delta$  7.43 (t, 1 H,  $J = 7.5$  Hz), 7.36 (d, 1 H,  $J = 7.5$  Hz), 7.20 (s, 1 H), 7.10 (d, 1 H,  $J = 7.5$  Hz), 7.03-6.99 (m, 2 H), 6.46 (t, 1 H,  $J = 53.5$  Hz), 2.46 (s, 3 H), 2.45 (s, 3 H).  $^{13}\text{C}$  NMR (125 MHz,  $\text{CDCl}_3$ ):  $\delta$  158.06, 156.73 (t,  $J = 4.5$  Hz), 153.76, 145.13, 138.65, 131.76, 130.41, 128.82, 128.62, 128.37, 125.89, 125.47, 117.10, 117.06, 116.42 (t,  $J = 22.1$  Hz), 112.01 (t,  $J = 236.9$  Hz), 21.76, 21.46.  $^{19}\text{F}$  NMR (470 MHz,  $\text{CDCl}_3$ ):  $\delta$  -114.98. HRMS (ESI): calcd for  $[\text{M}+\text{H}]^+$   $\text{C}_{18}\text{H}_{15}\text{F}_2\text{O}_2$ : 300.1040, found: 300.1049.

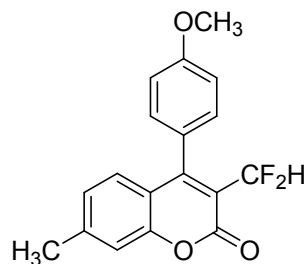

**3-(difluoromethyl)-4-(4-methoxyphenyl)-7-methyl-2H-chromen-2-one (3t):**

$^1\text{H}$  NMR (500 MHz,  $\text{CDCl}_3$ ):  $\delta$  7.26 (d, 2 H,  $J = 8.5$  Hz), 7.20 (s, 1 H), 7.09-7.07 (m, 3 H), 7.04 (d, 1 H,  $J = 8.5$  Hz), 6.52 (t, 1 H,  $J = 53.5$  Hz), 3.91 (s, 3 H), 2.47 (s, 3 H).  $^{13}\text{C}$  NMR (125 MHz,  $\text{CDCl}_3$ ):  $\delta$  160.66, 158.20, 156.54 (t,  $J = 4.3$  Hz), 153.77, 145.05, 129.77, 128.32, 125.85, 123.79, 117.32, 117.08, 116.56 (t,  $J = 22.0$  Hz), 114.19, 112.10 (t,  $J = 236.9$  Hz), 55.42, 21.71.  $^{19}\text{F}$  NMR (470 MHz,  $\text{CDCl}_3$ ):  $\delta$  -114.54. HRMS (ESI): calcd for  $[\text{M}+\text{H}]^+$   $\text{C}_{18}\text{H}_{15}\text{F}_2\text{O}_3$ : 317.0989, found: 317.0996.

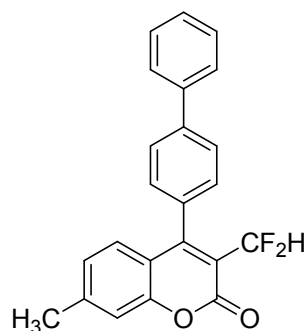

**4-([1,1'-biphenyl]-4-yl)-3-(difluoromethyl)-7-methyl-2H-chromen-2-one (3u):**

$^1\text{H}$  NMR (500 MHz,  $\text{CDCl}_3$ ):  $\delta$  7.76 (d, 2 H,  $J = 8.0$  Hz), 7.67 (d, 2 H,  $J = 8.0$  Hz), 7.50 (t, 2 H,  $J = 7.5$  Hz), 7.43-7.38 (m, 3 H), 7.21 (s, 1 H), 7.08 (d, 1 H,  $J = 8.0$  Hz), 7.04 (d, 1 H,  $J = 8.0$  Hz), 6.57 (t, 1 H,  $J = 53.0$  Hz), 2.47 (s, 3 H).  $^{13}\text{C}$  NMR (125 MHz,  $\text{CDCl}_3$ ):  $\delta$  158.21, 156.30 (t,  $J = 4.0$  Hz), 153.81, 145.24, 145.56, 139.86,

130.72, 129.03, 128.96, 128.30, 128.06, 127.31, 127.17, 125.96, 117.17, 117.12, 116.70 (t,  $J = 22.1$  Hz), 111.95 (t,  $J = 237.1$  Hz), 21.78.  $^{19}\text{F}$  NMR (470 MHz,  $\text{CDCl}_3$ ):  $\delta$  -114.29. HRMS (ESI): calcd for  $[\text{M}+\text{H}]^+$   $\text{C}_{23}\text{H}_{17}\text{F}_2\text{O}_2$ : 363.1196, found: 363.1203.

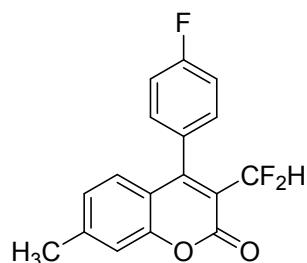

**3-(difluoromethyl)-4-(4-fluorophenyl)-7-methyl-2H-chromen-2-one (3v):**

$^1\text{H}$  NMR (500 MHz,  $\text{CDCl}_3$ ):  $\delta$  7.35-7.32 (m, 2 H), 7.29-7.23 (m, 3 H), 7.06 (dd, 1 H,  $J_1 = 10.0$  Hz,  $J_2 = 1.0$  Hz), 7.15-7.12 (m, 2 H), 6.98 (d, 1 H,  $J = 10.5$  Hz), 6.61 (t, 1 H,  $J = 66.5$  Hz), 2.49 (s, 3 H).  $^{13}\text{C}$  NMR (125 MHz,  $\text{CDCl}_3$ ):  $\delta$  163.33(d,  $J = 248.4$  Hz), 158.40, 155.44 (t,  $J = 3.4$  Hz), 153.71, 145.37, 130.40 (d,  $J = 8.3$  Hz), 128.02, 127.92 (d,  $J = 3.5$  Hz), 126.03, 117.21, 117.10 (t,  $J = 22.1$  Hz), 115.90 (d,  $J = 21.8$  Hz), 111.65 (t,  $J = 237.3$  Hz), 21.76.  $^{19}\text{F}$  NMR (470 MHz,  $\text{CDCl}_3$ ):  $\delta$  -110.79 (s, 1 F), -113.71 (s, 2 F). HRMS (ESI): calcd for  $[\text{M}+\text{H}]^+$   $\text{C}_{17}\text{H}_{12}\text{F}_3\text{O}_2$ : 305.0789, found: 305.0782.

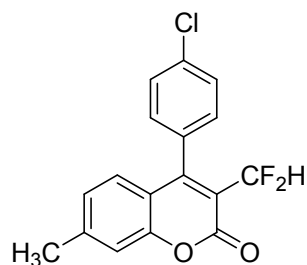

**4-(4-chlorophenyl)-3-(difluoromethyl)-7-methyl-2H-chromen-2-one (3w):**

$^1\text{H}$  NMR (500 MHz,  $\text{CDCl}_3$ ):  $\delta$  7.55 (d, 2 H,  $J = 8.5$  Hz), 7.29 (d, 2 H,  $J = 8.0$  Hz), 7.05 (d, 1 H,  $J = 8.5$  Hz), 6.97 (d, 1 H,  $J = 8.0$  Hz), 6.63 (t, 1 H,  $J = 53.5$  Hz), 2.49 (s, 3 H).  $^{13}\text{C}$  NMR (125 MHz,  $\text{CDCl}_3$ ):  $\delta$  158.41, 155.15 (t,  $J = 3.1$  Hz), 153.71, 145.44, 135.86, 130.46, 129.78, 128.95, 127.95, 126.06, 117.24, 117.05 (t,  $J = 22.1$  Hz), 117.00, 111.56 (t,  $J = 237.5$  Hz), 21.77.  $^{19}\text{F}$  NMR (470 MHz,  $\text{CDCl}_3$ ):  $\delta$  -113.45. HRMS (ESI): calcd for  $[\text{M}+\text{H}]^+$   $\text{C}_{17}\text{H}_{12}\text{ClF}_2\text{O}_2$ : 321.0494, found: 321.0488.

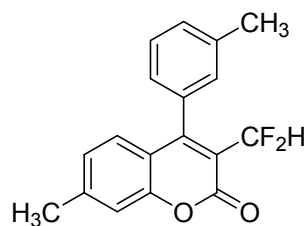

**3-(difluoromethyl)-7-methyl-4-(m-tolyl)-2H-chromen-2-one (3x):**

$^1\text{H}$  NMR (500 MHz,  $\text{CDCl}_3$ ):  $\delta$  7.45 (t, 1 H,  $J = 8.0$  Hz), 7.37 (d, 2 H,  $J = 8.0$  Hz), 7.21 (s, 1 H), 7.12 (d, 2 H,  $J = 7.5$  Hz), 7.05-7.01 (m, 2 H), 6.48 (t, 1 H,  $J = 53.0$  Hz), 2.48 (s, 3 H), 2.46 (s, 3 H).  $^{13}\text{C}$  NMR (125 MHz,  $\text{CDCl}_3$ ):  $\delta$  158.04, 156.73 (t,  $J = 4.6$  Hz), 153.76, 145.14, 138.66, 131.75, 130.42, 128.82, 128.63, 128.37, 125.89, 125.47, 117.08, 117.05, 116.41 (t,  $J = 22.0$  Hz), 112.02 (t,  $J = 236.8$  Hz), 21.76, 21.47.  $^{19}\text{F}$  NMR (470 MHz,  $\text{CDCl}_3$ ):  $\delta$  -114.99. HRMS (ESI): calcd for  $[\text{M}+\text{H}]^+$   $\text{C}_{18}\text{H}_{15}\text{F}_2\text{O}_2$ : 301.1040, found: 301.1033.

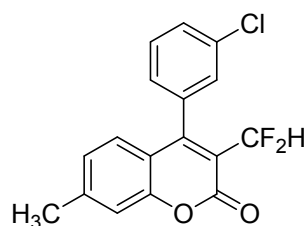

**4-(3-chlorophenyl)-3-(difluoromethyl)-7-methyl-2H-chromen-2-one (3y):**

$^1\text{H}$  NMR (500 MHz,  $\text{CDCl}_3$ ):  $\delta$  7.54-7.48 (m, 2 H), 7.33 (t, 1 H,  $J = 1.5$  Hz), 7.23-7.22 (m, 2 H), 7.05 (dd, 1 H,  $J_1 = 8.5$  Hz,  $J_2 = 1.0$  Hz), 6.94 (d, 1 H,  $J = 8.5$  Hz), 6.59 (t, 1 H,  $J = 53.5$  Hz), 2.47 (s, 3 H).  $^{13}\text{C}$  NMR (125 MHz,  $\text{CDCl}_3$ ):  $\delta$  158.30, 154.62 (t,  $J = 3.3$  Hz), 153.69, 145.53, 134.80, 133.76, 129.99, 129.77, 128.32, 127.97, 126.61, 126.13, 117.23, 117.03, 116.84, 111.51 (t,  $J = 237.6$  Hz), 21.79.  $^{19}\text{F}$  NMR (470 MHz,  $\text{CDCl}_3$ ):  $\delta$  -113.66. HRMS (ESI): calcd for  $[\text{M}+\text{H}]^+$   $\text{C}_{17}\text{H}_{12}\text{ClF}_2\text{O}_2$ : 321.0494, found: 321.0499.

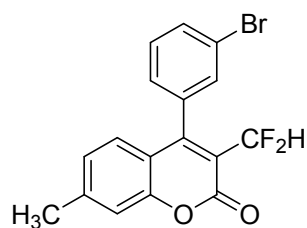

**4-(3-bromophenyl)-3-(difluoromethyl)-7-methyl-2H-chromen-2-one (3z):**

$^1\text{H}$  NMR (500 MHz,  $\text{CDCl}_3$ ):  $\delta$  7.69 (dd, 1 H,  $J_1 = 8.0$  Hz,  $J_2 = 0.5$  Hz), 7.48 (s, 1 H), 7.43 (t, 1 H,  $J = 8.0$  Hz), 7.28-7.27 (m, 1 H), 7.22 (s, 1 H), 7.05 (d, 1 H,  $J = 8.5$  Hz), 6.95 (d, 1 H,  $J = 8.5$  Hz), 6.59 (t, 1 H,  $J = 53.0$  Hz), 2.47 (s, 3 H).  $^{13}\text{C}$  NMR (125 MHz,  $\text{CDCl}_3$ ):  $\delta$  158.28, 154.51 (t,  $J = 3.1$  Hz), 153.68, 145.55, 134.00, 132.70, 131.09, 130.19, 127.98, 127.07, 126.15, 122.74, 117.22, 117.01, 116.84, 111.51 (t,  $J = 237.5$  Hz), 21.79.  $^{19}\text{F}$  NMR (470 MHz,  $\text{CDCl}_3$ ):  $\delta$  -113.60. HRMS (ESI): calcd for  $[\text{M}+\text{H}]^+$   $\text{C}_{17}\text{H}_{12}\text{BrF}_2\text{O}_2$ : 364.9988, found: 364.9981.

Reference :

- (1) C. E. Song, D.-U. Jung, S. Y. Choung, E. J. Roh and S.-G. Lee, *Angew. Chem., Int. Ed.*, 2004, **43**, 6183.

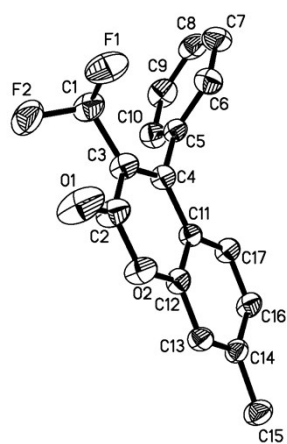

**Figure 1** The ORTEP drawing of **3a**

<sup>1</sup>H NMR, <sup>13</sup>C NMR and <sup>19</sup>F NMR spectra of compound **3a**:

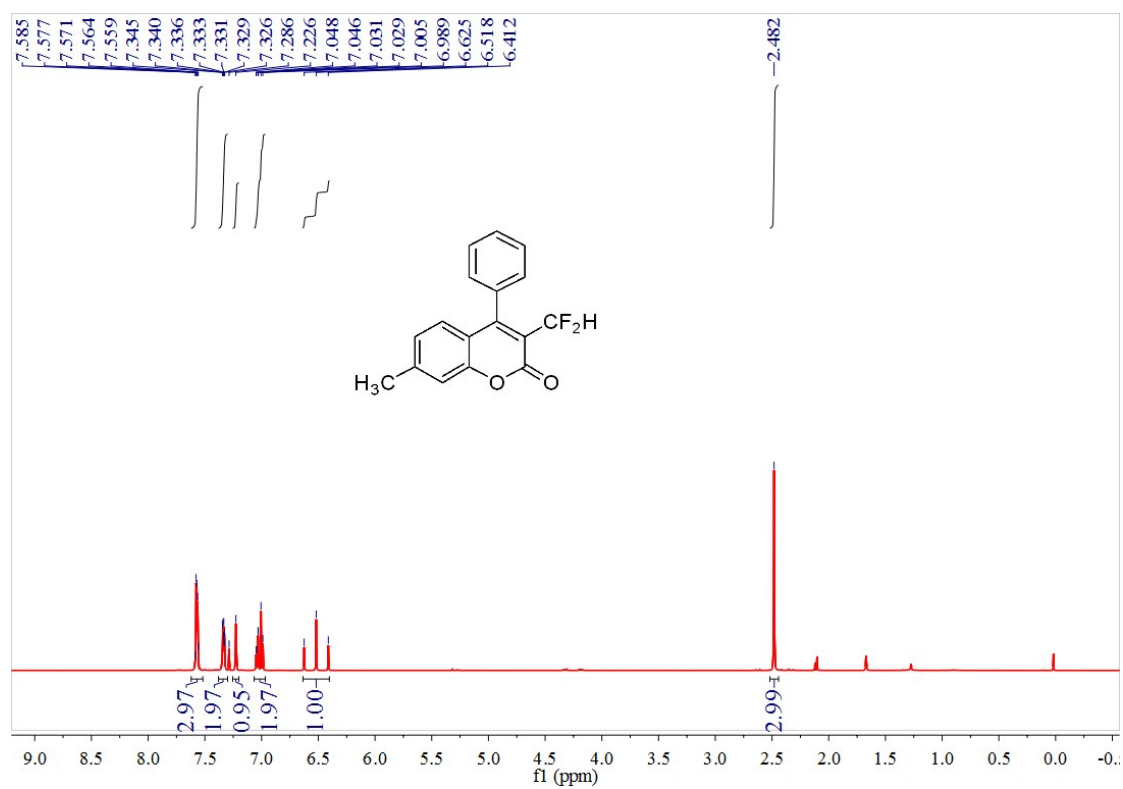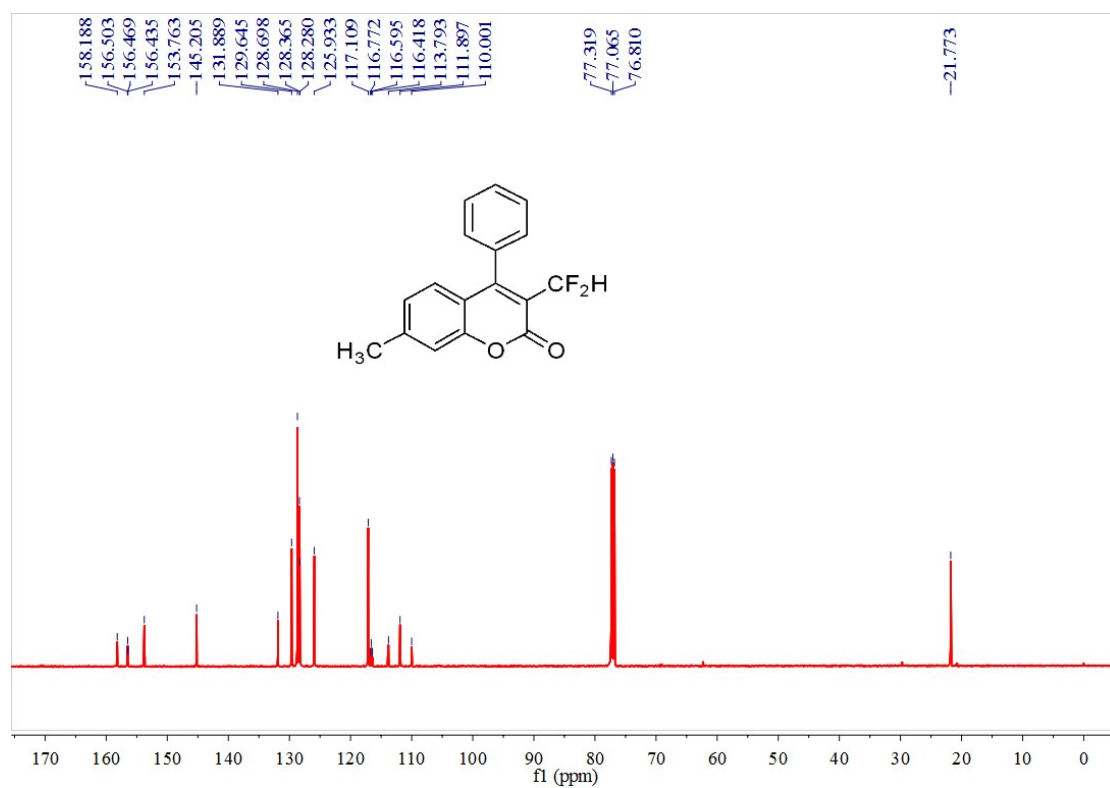

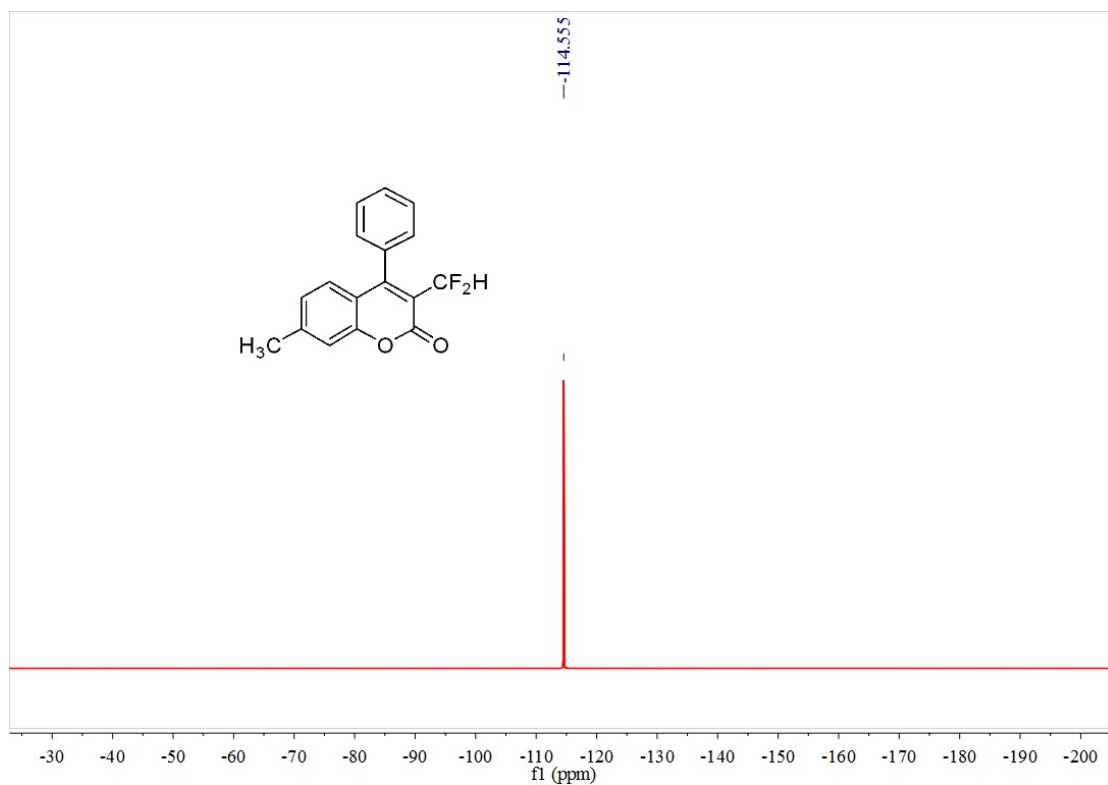

$^1\text{H}$  NMR,  $^{13}\text{C}$  NMR and  $^{19}\text{F}$  NMR spectra of compound **3b**:

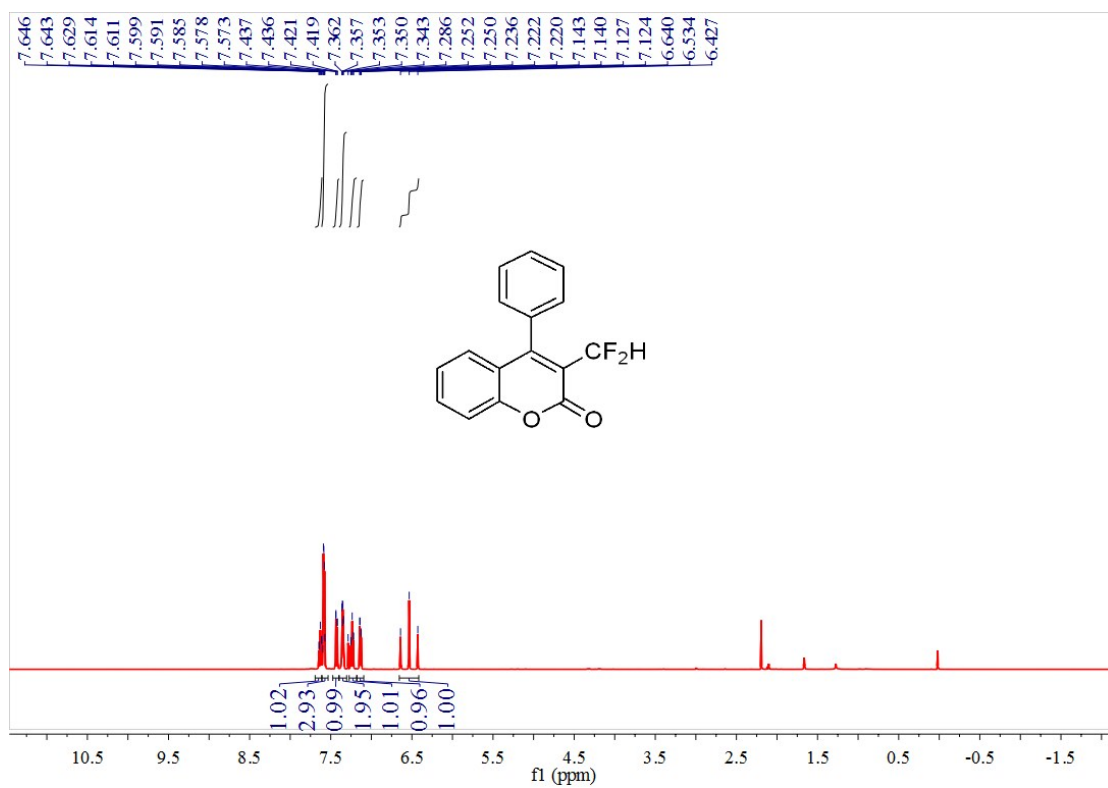



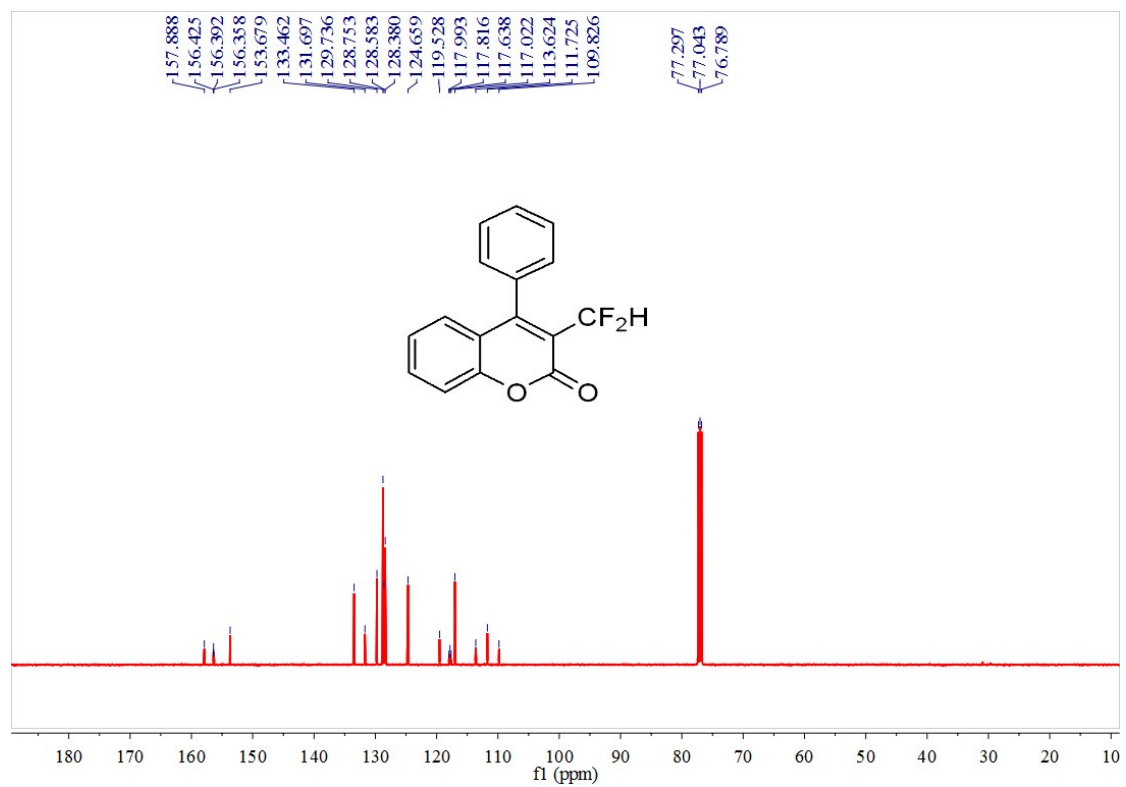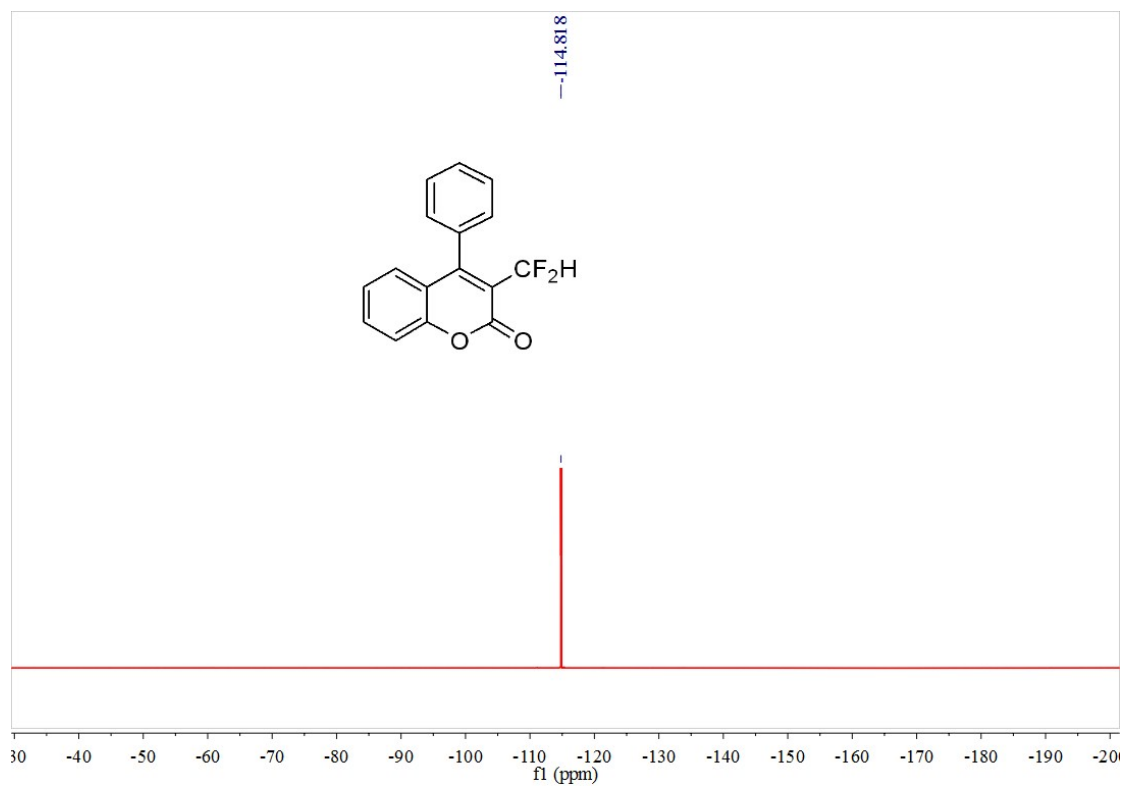

$^1\text{H}$  NMR,  $^{13}\text{C}$  NMR and  $^{19}\text{F}$  NMR spectra of compound **3c**:

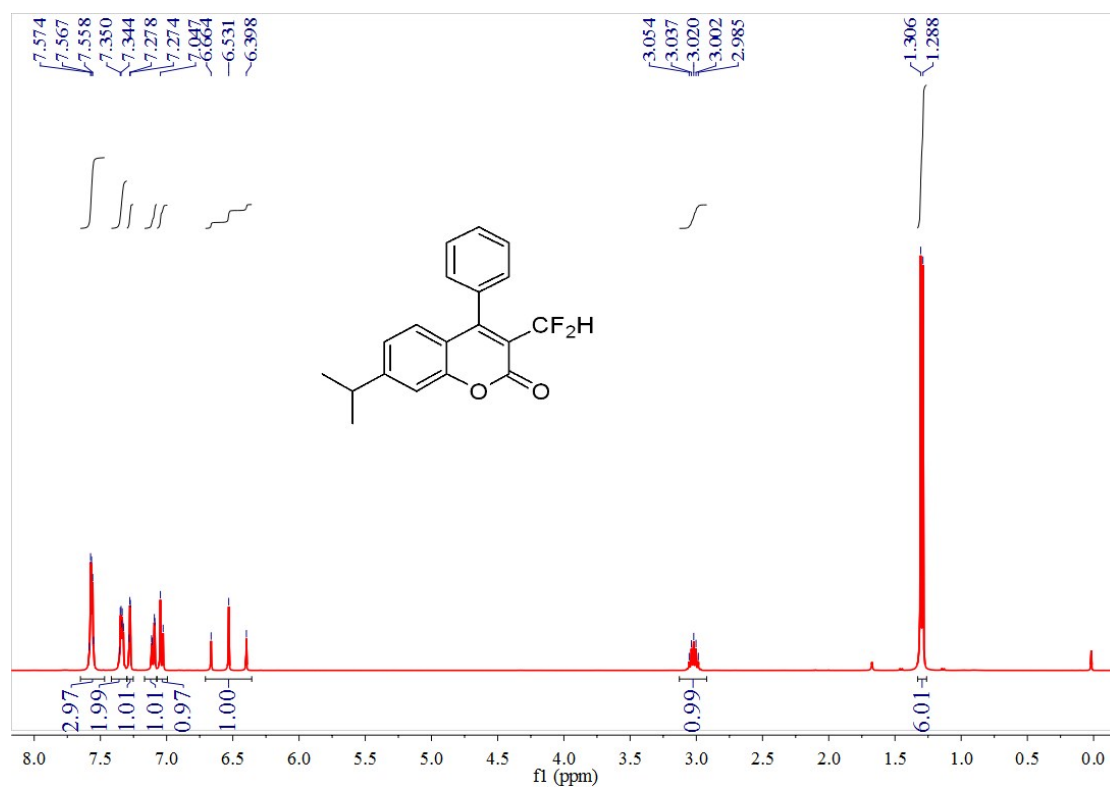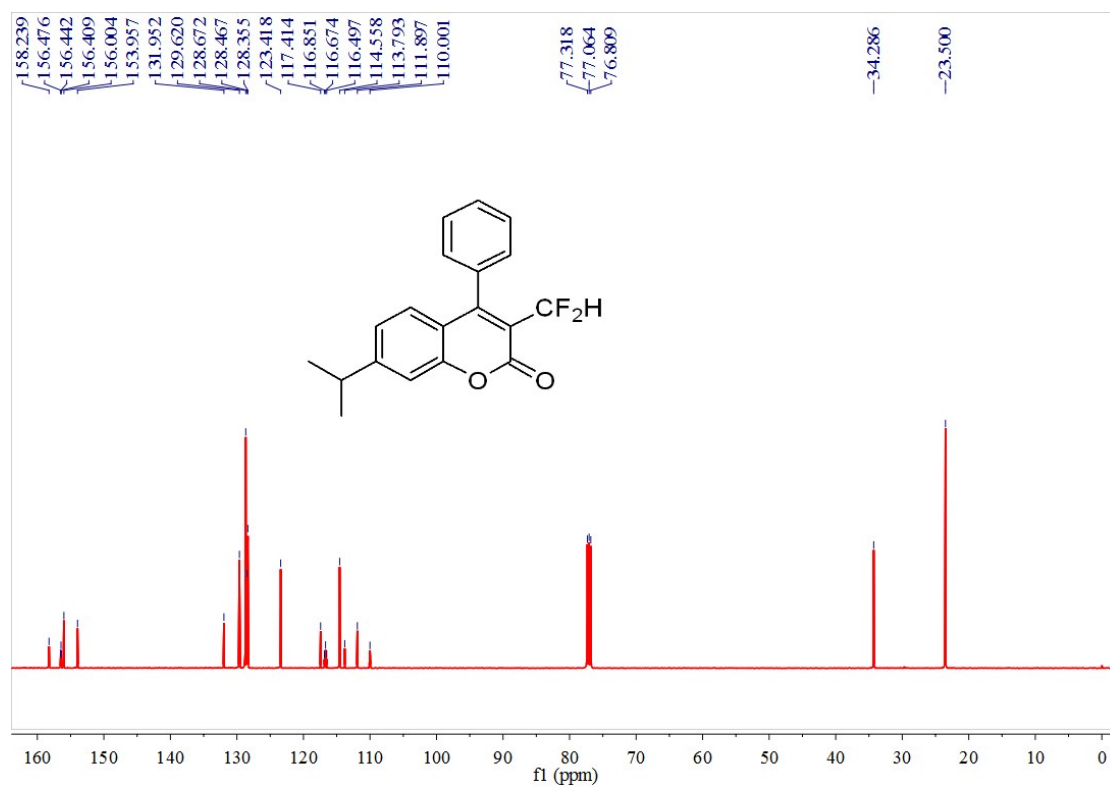

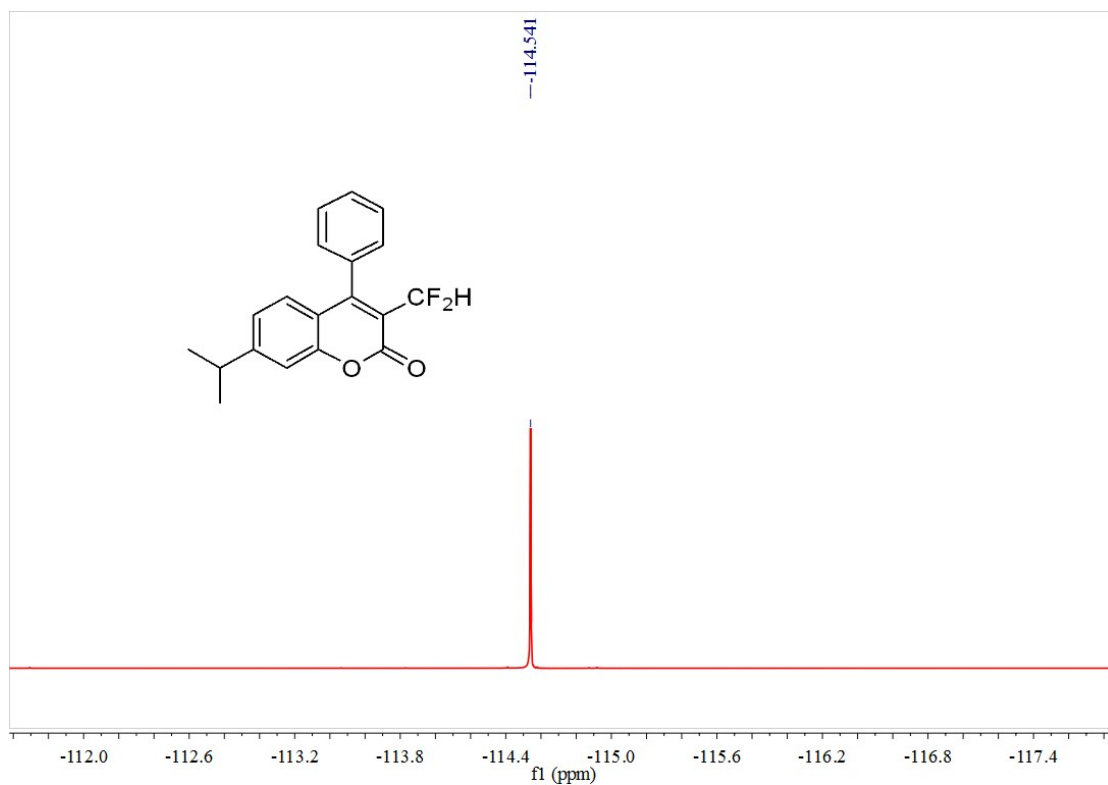

$^1\text{H}$  NMR,  $^{13}\text{C}$  NMR and  $^{19}\text{F}$  NMR spectra of compound **3d**:

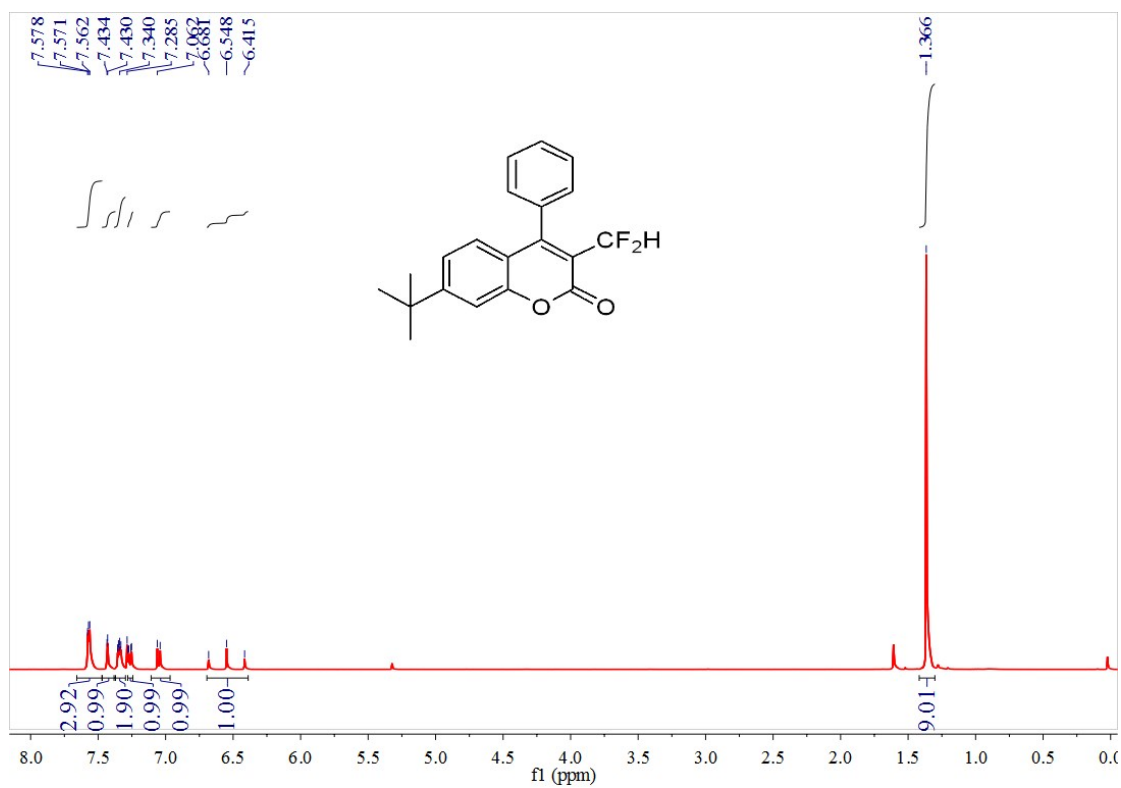

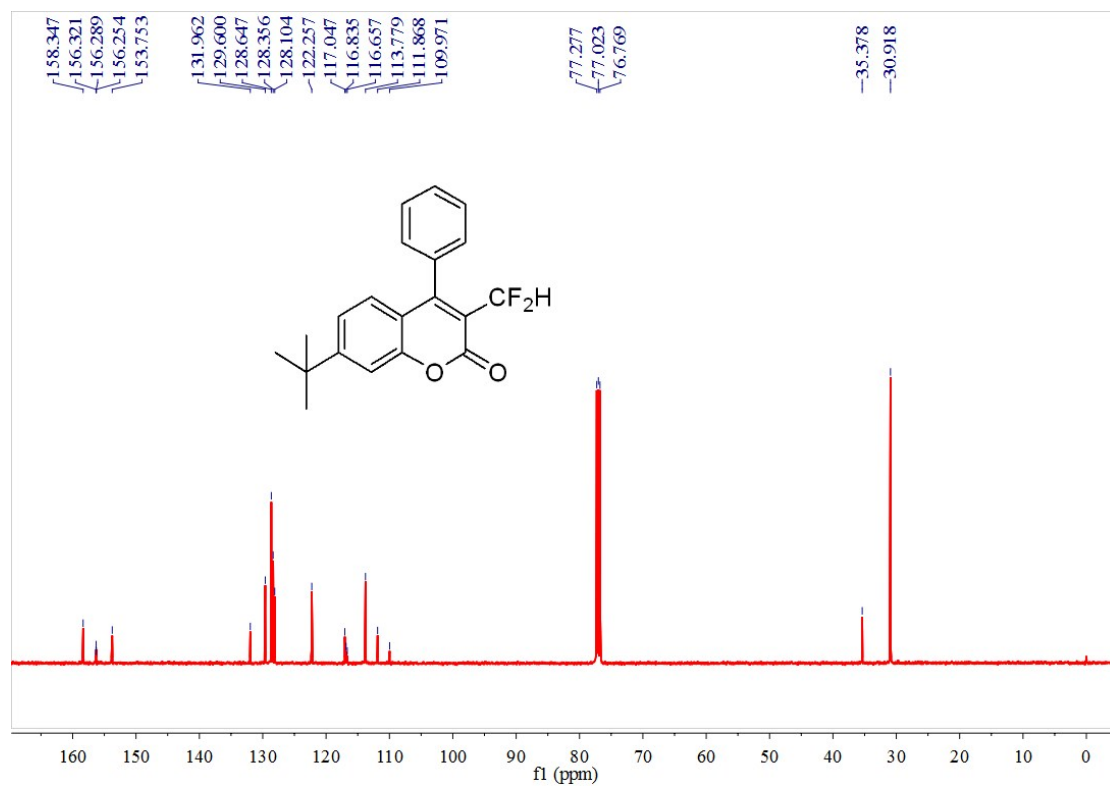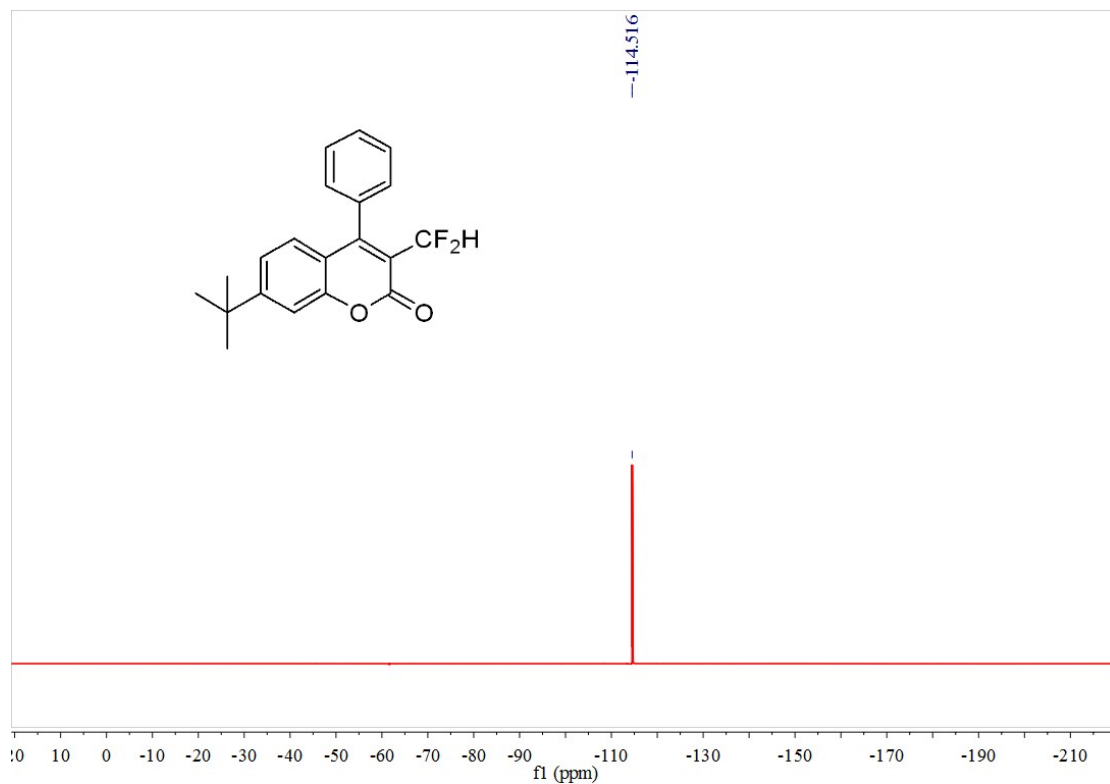

$^1\text{H}$  NMR,  $^{13}\text{C}$  NMR and  $^{19}\text{F}$  NMR spectra of compound **3e**:

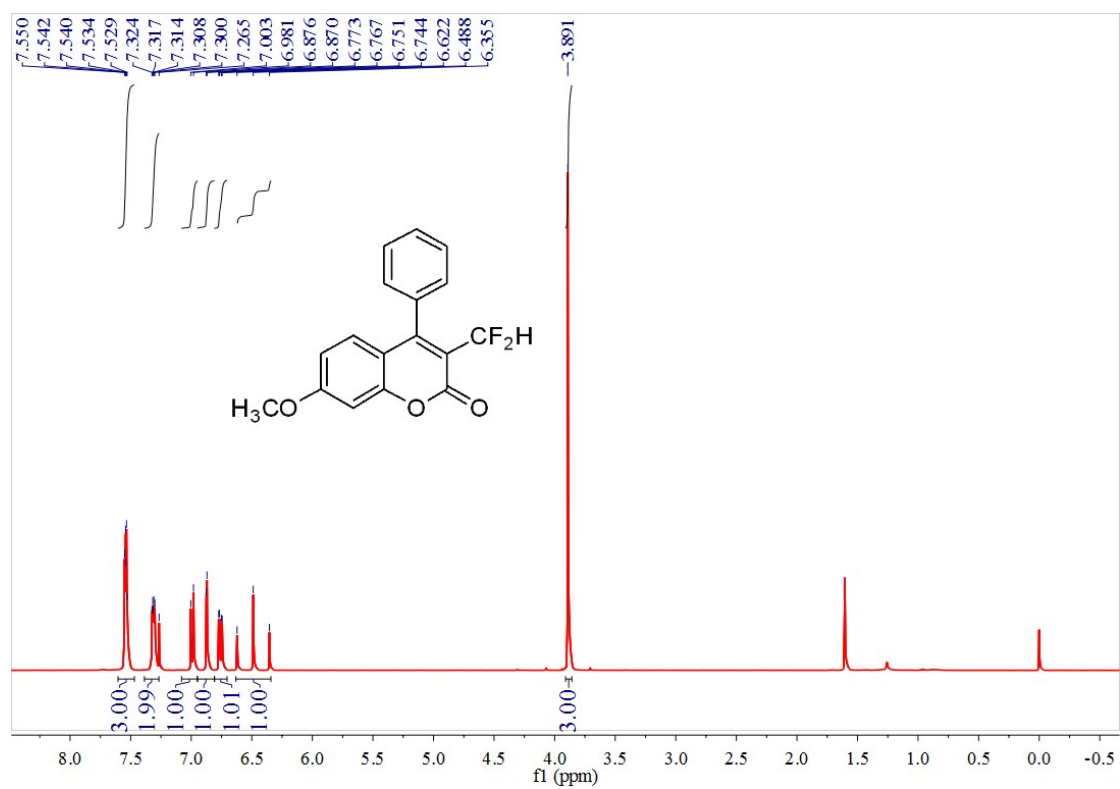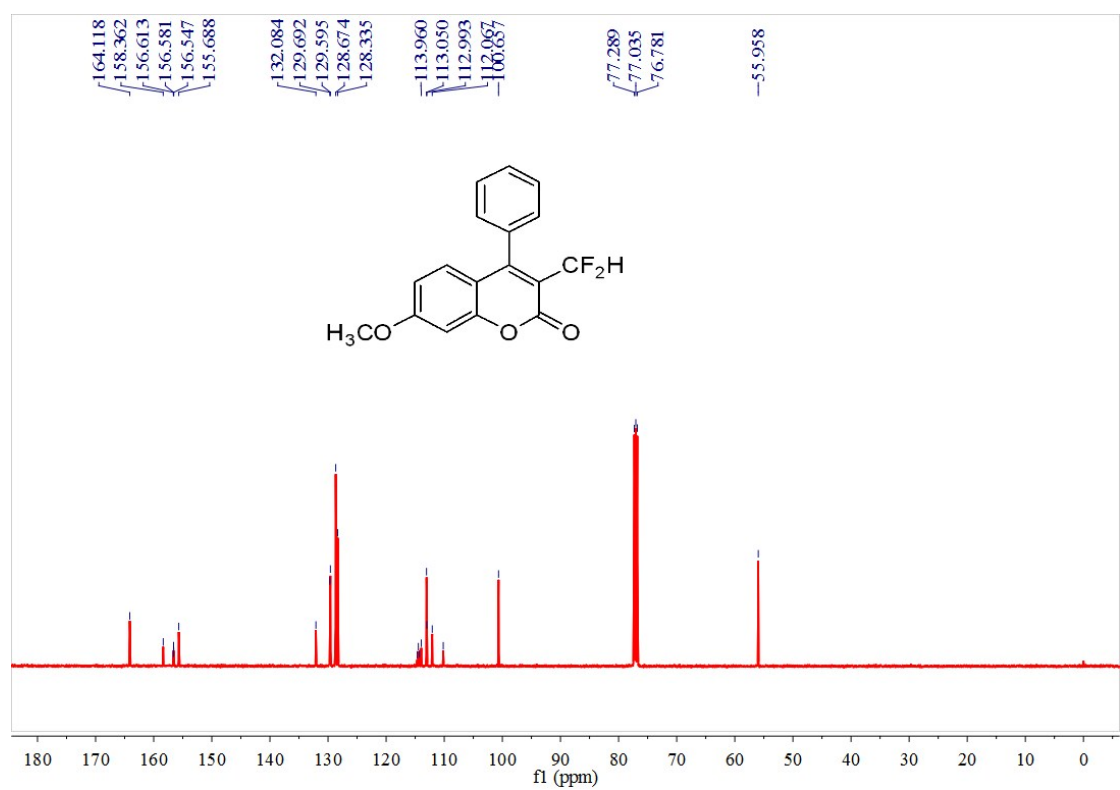

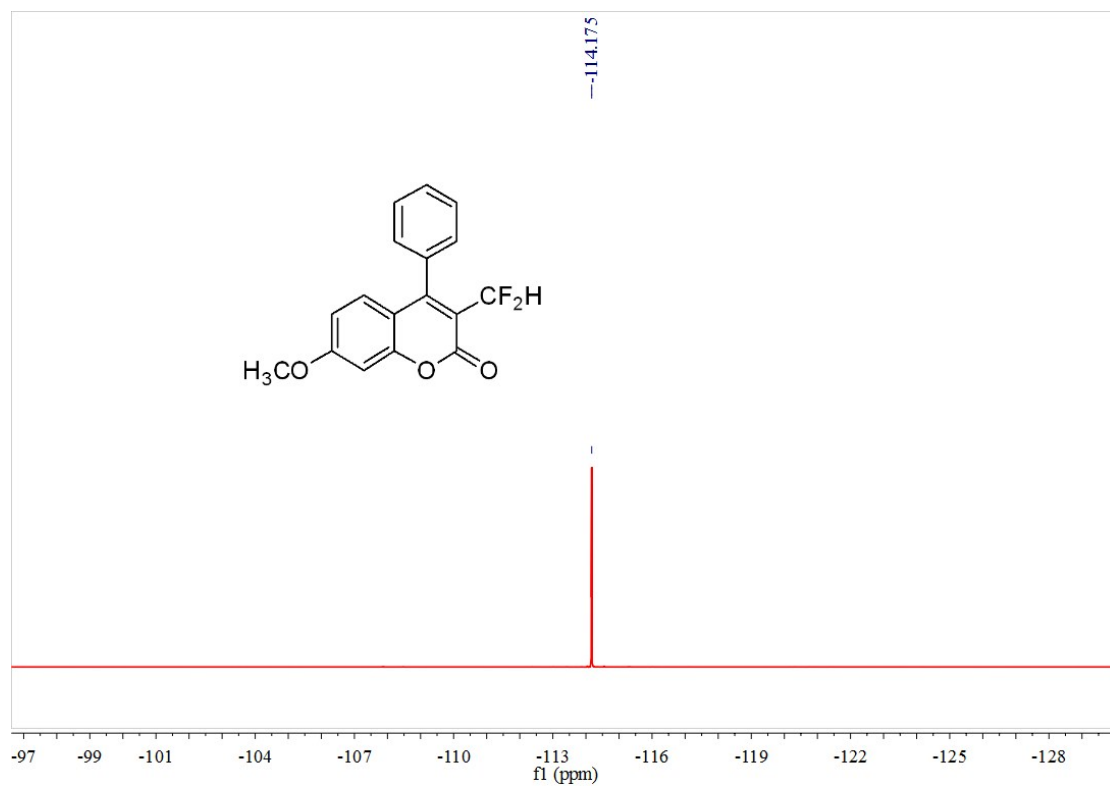

$^1\text{H}$  NMR,  $^{13}\text{C}$  NMR and  $^{19}\text{F}$  NMR spectra of compound **3f**:

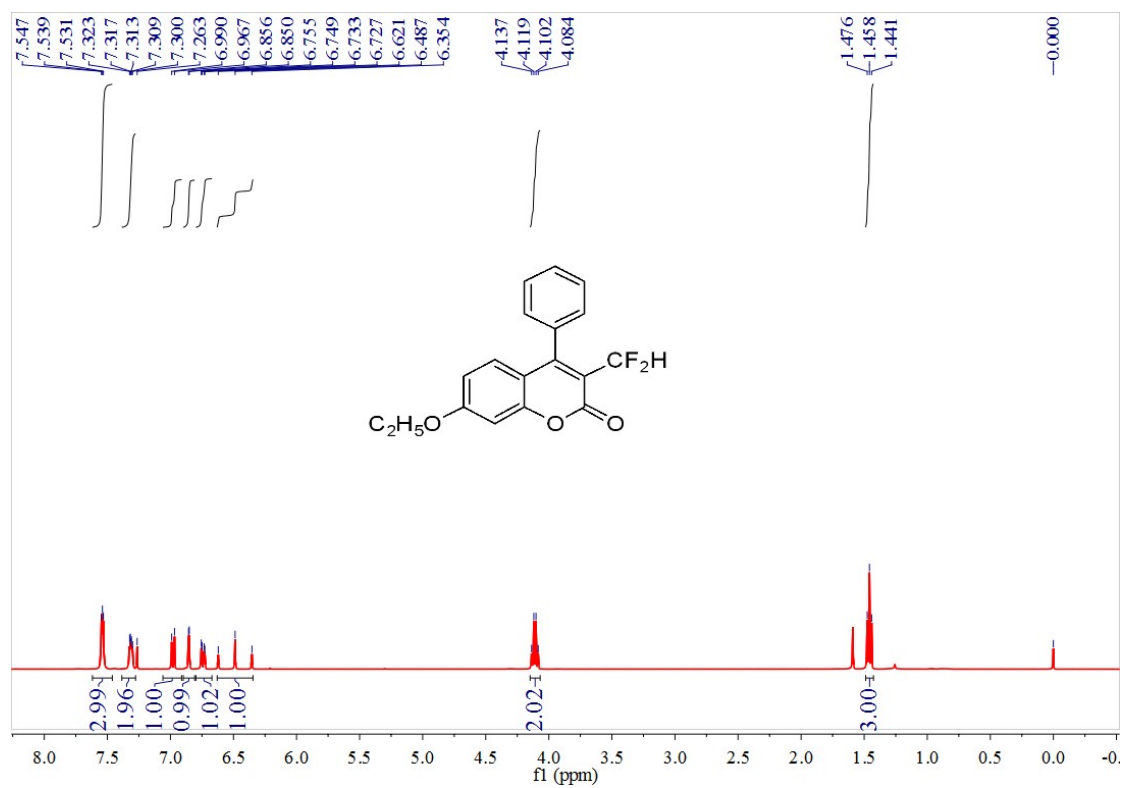

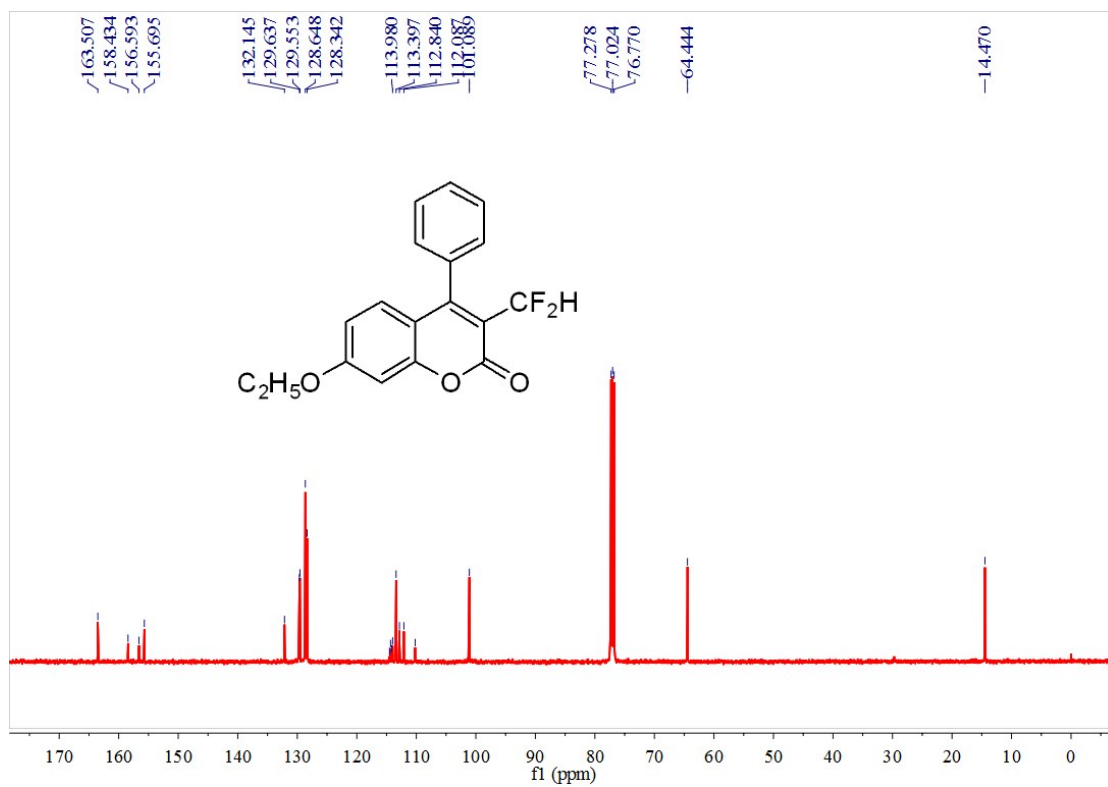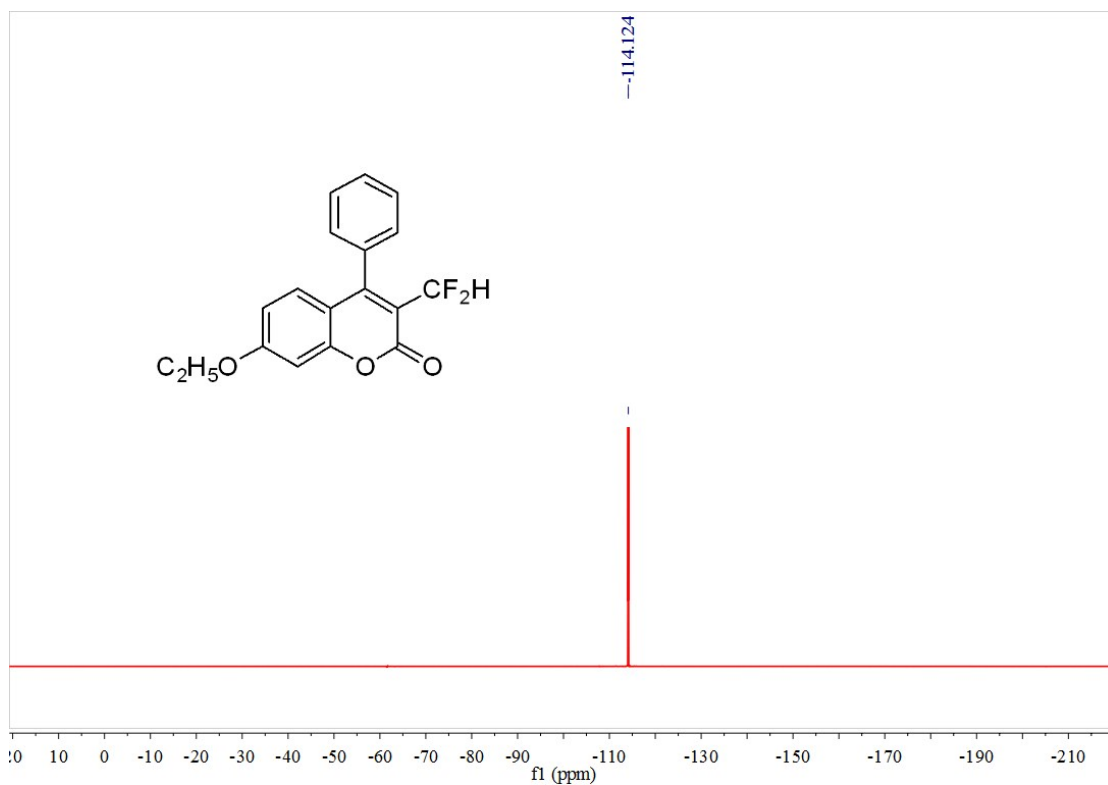

$^1\text{H}$  NMR,  $^{13}\text{C}$  NMR and  $^{19}\text{F}$  NMR spectra of compound **3g**:

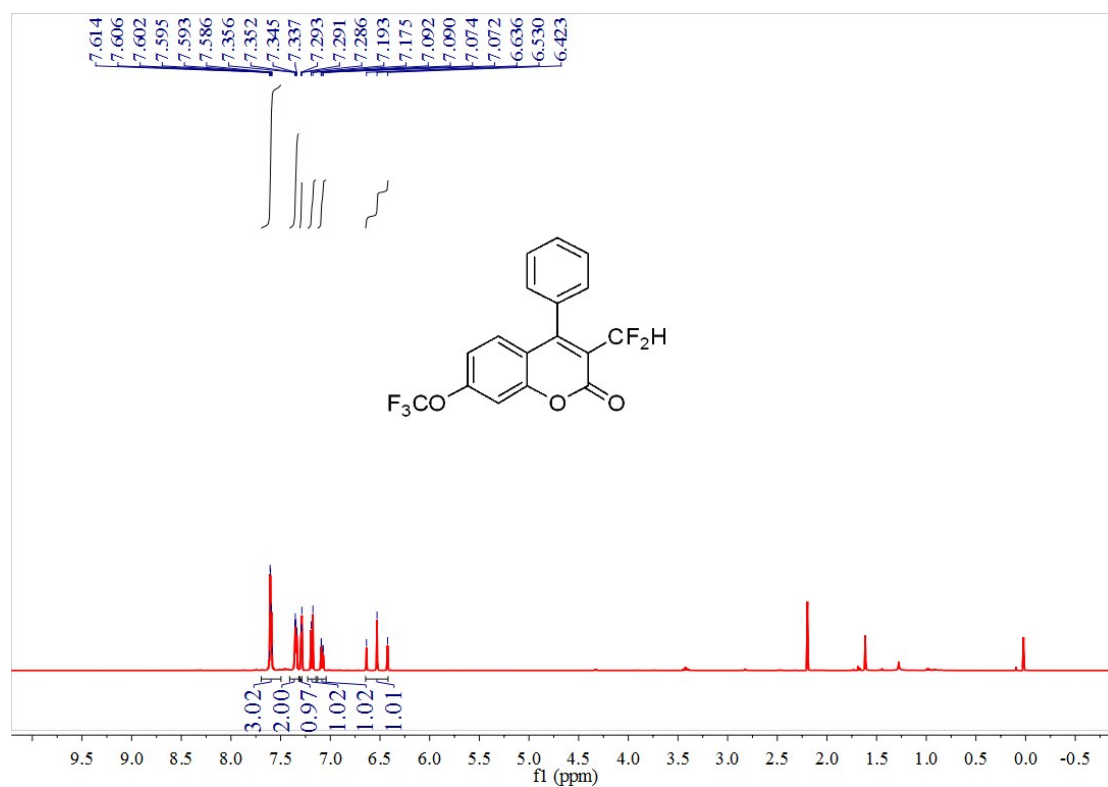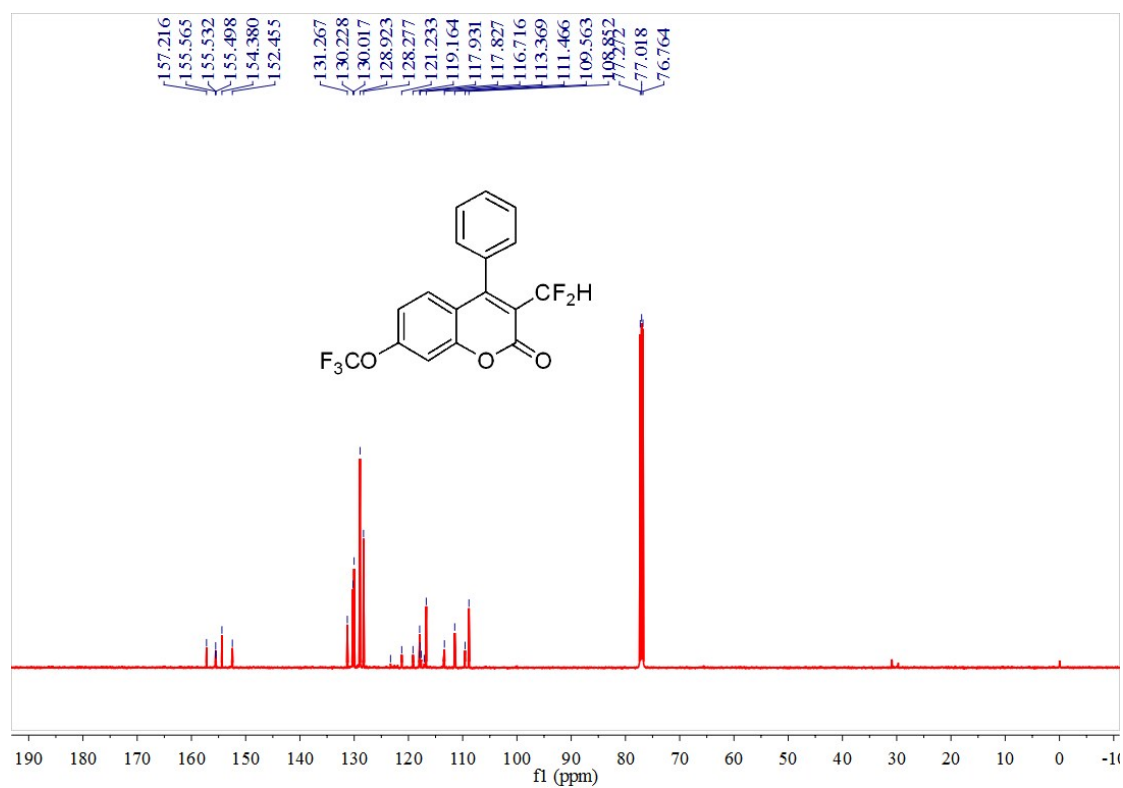



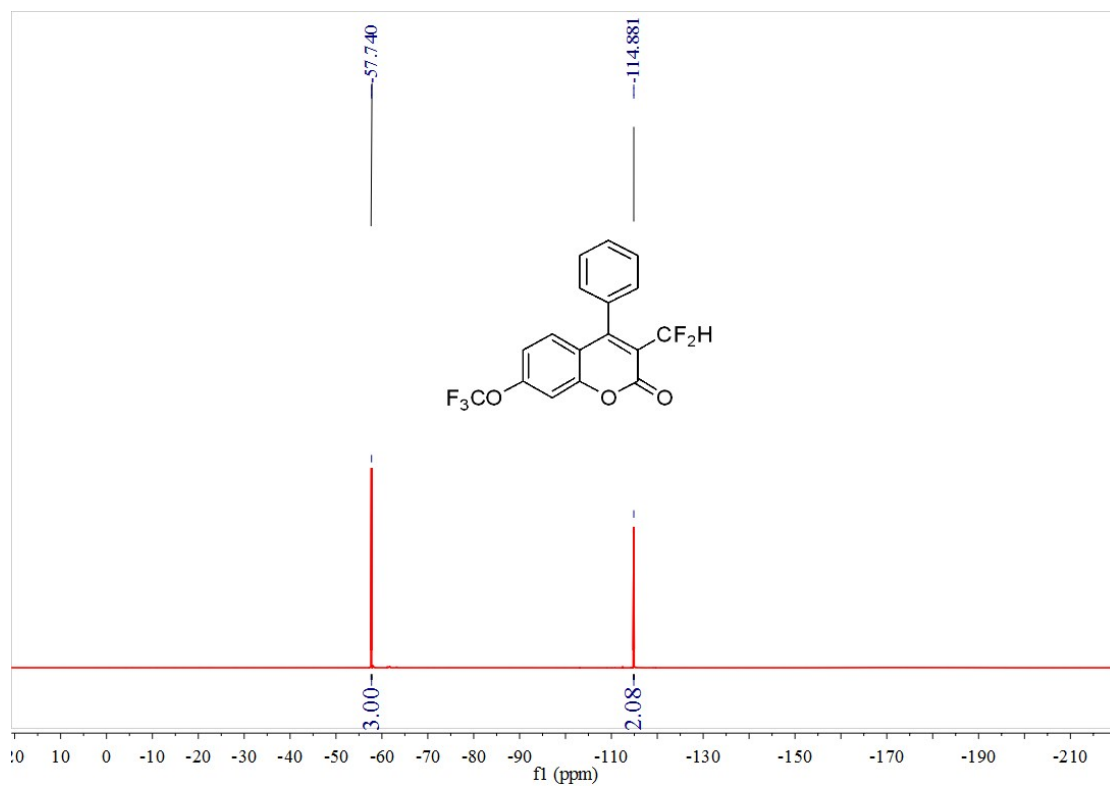

<sup>1</sup>H NMR, <sup>13</sup>C NMR and <sup>19</sup>F NMR spectra of compound **3h**:

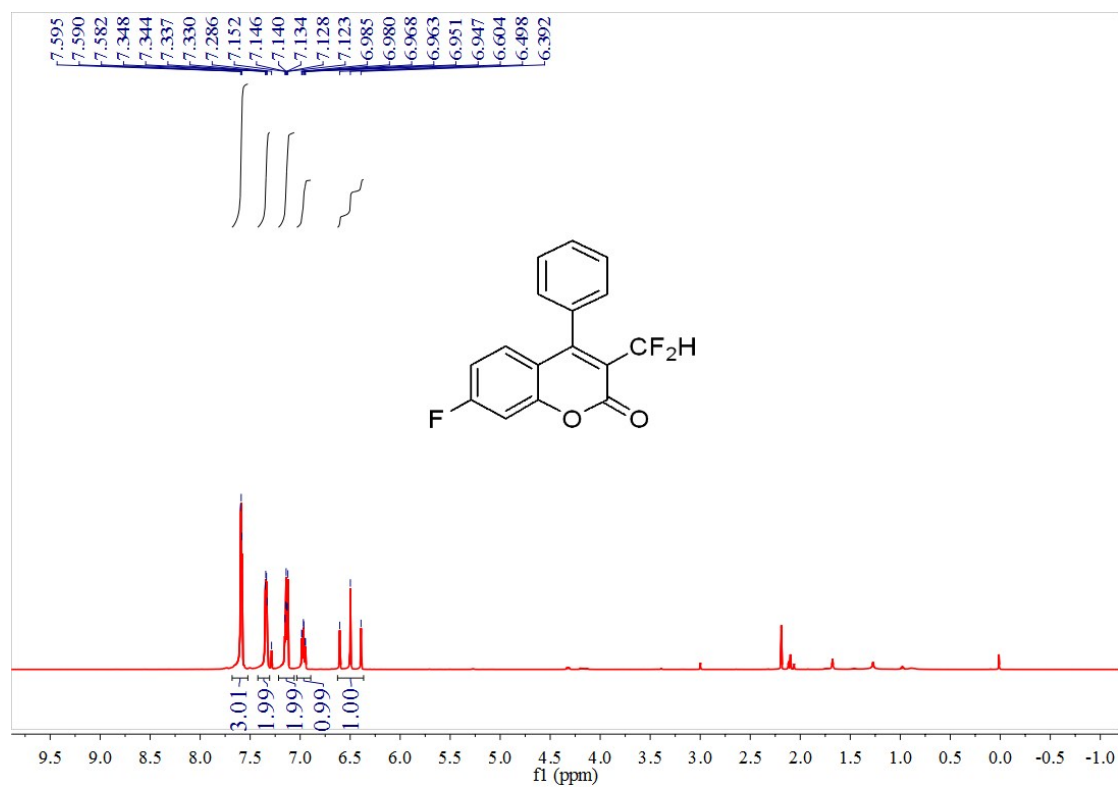

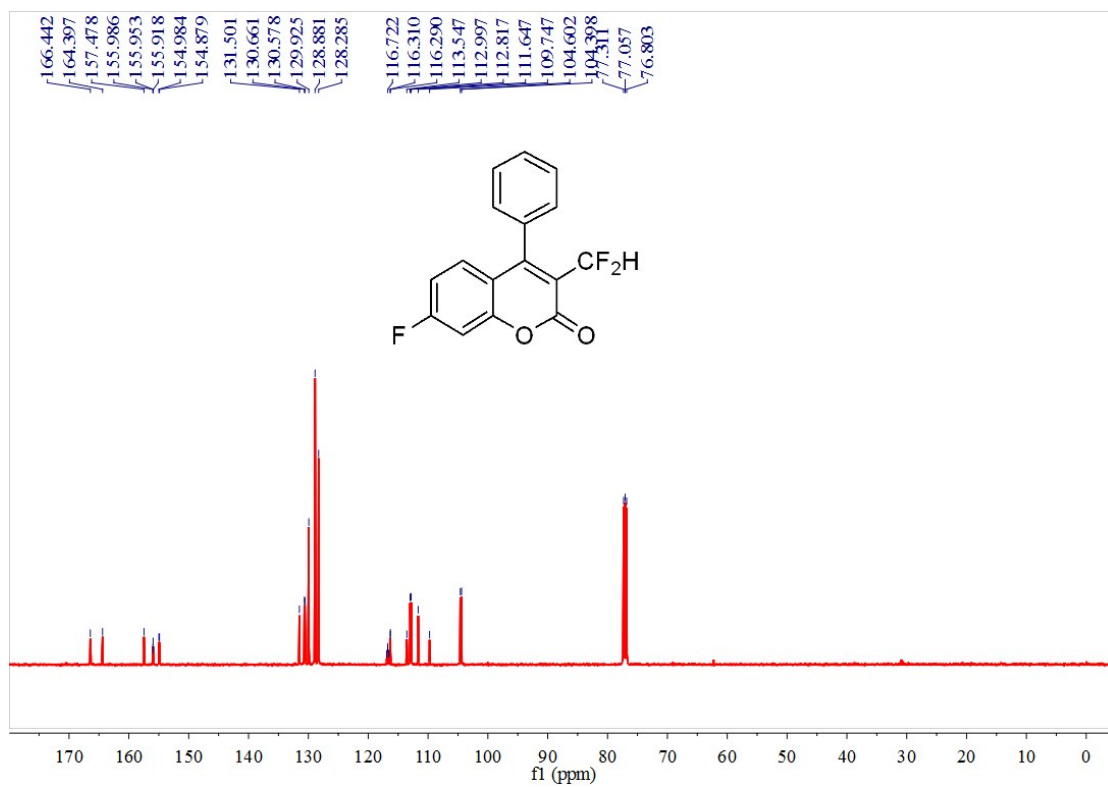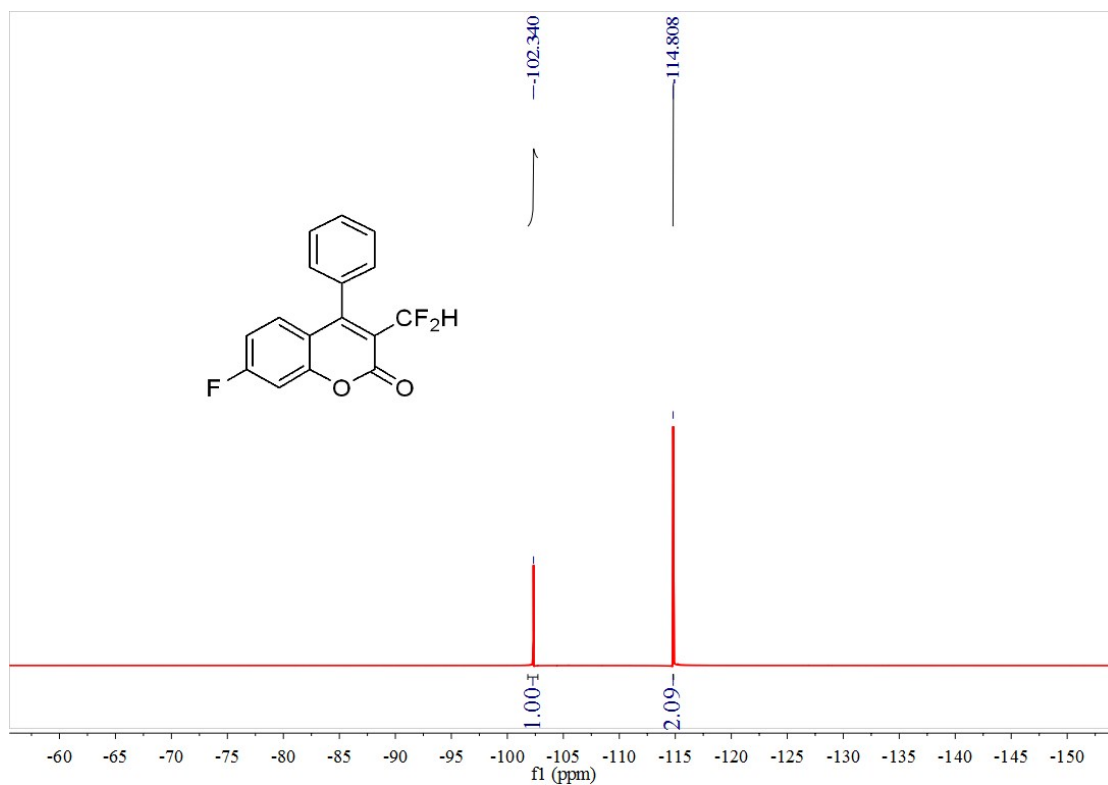

$^1\text{H}$  NMR,  $^{13}\text{C}$  NMR and  $^{19}\text{F}$  NMR spectra of compound **3i**:

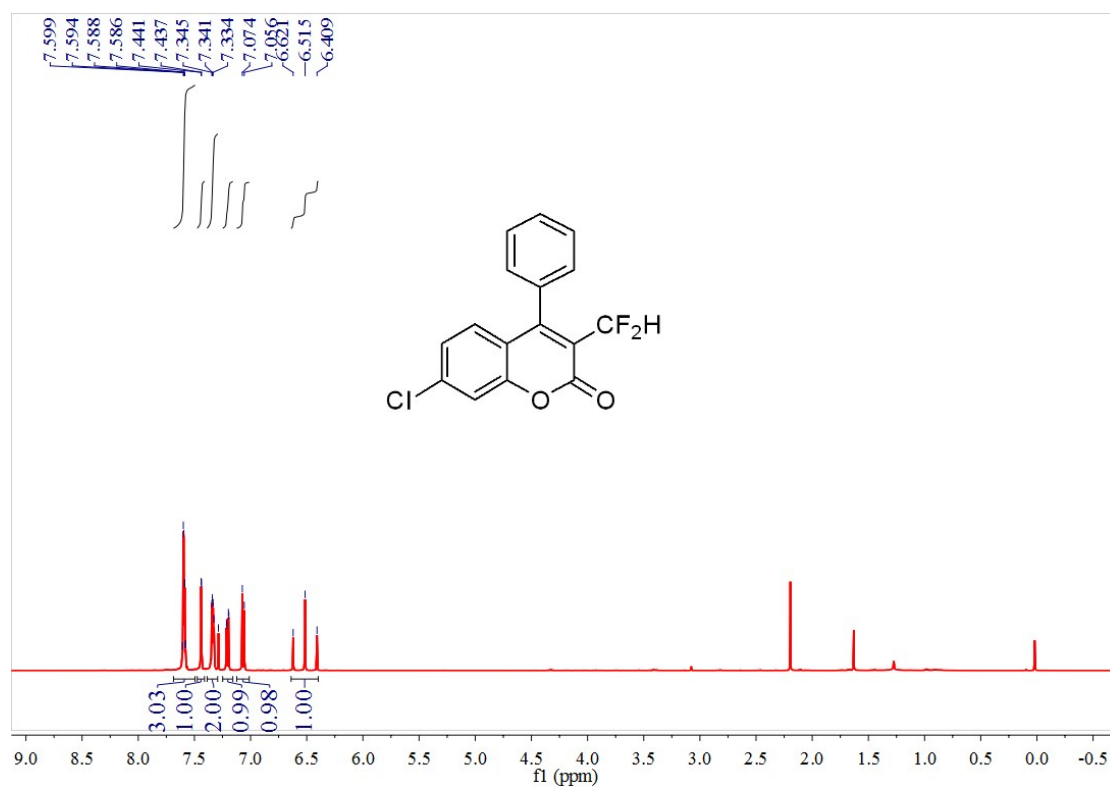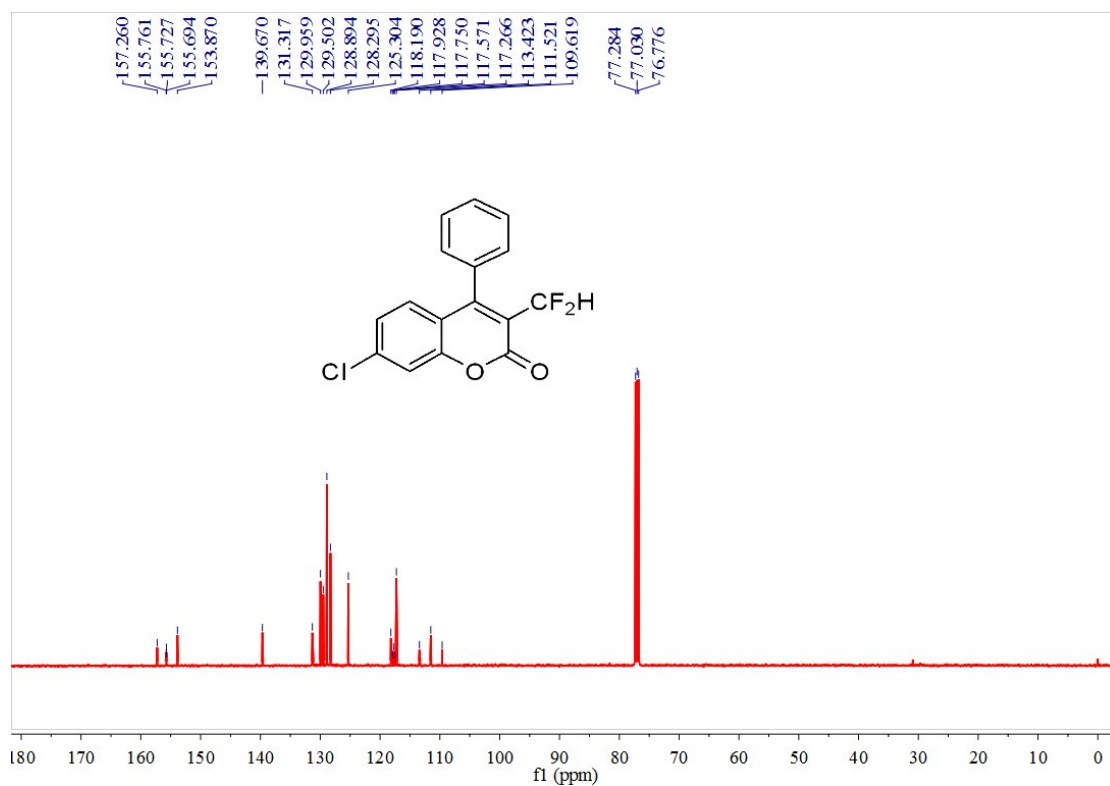

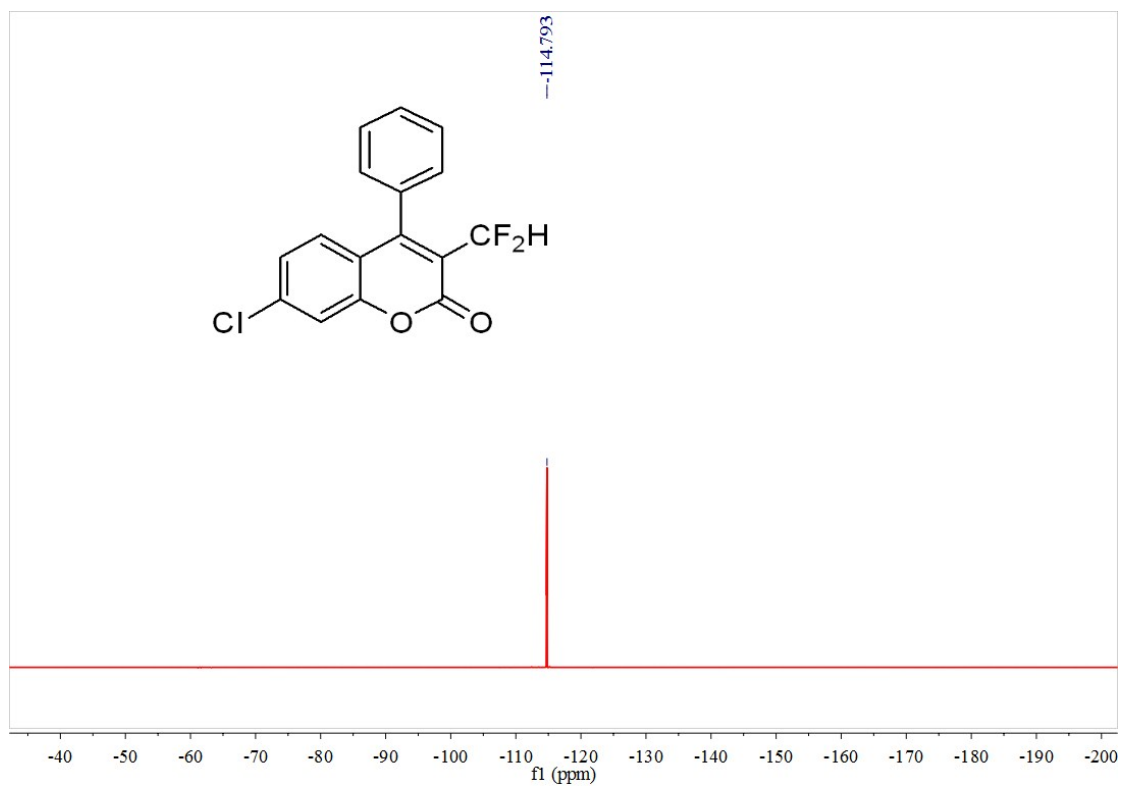

$^1\text{H}$  NMR,  $^{13}\text{C}$  NMR and  $^{19}\text{F}$  NMR spectra of compound **3j**:

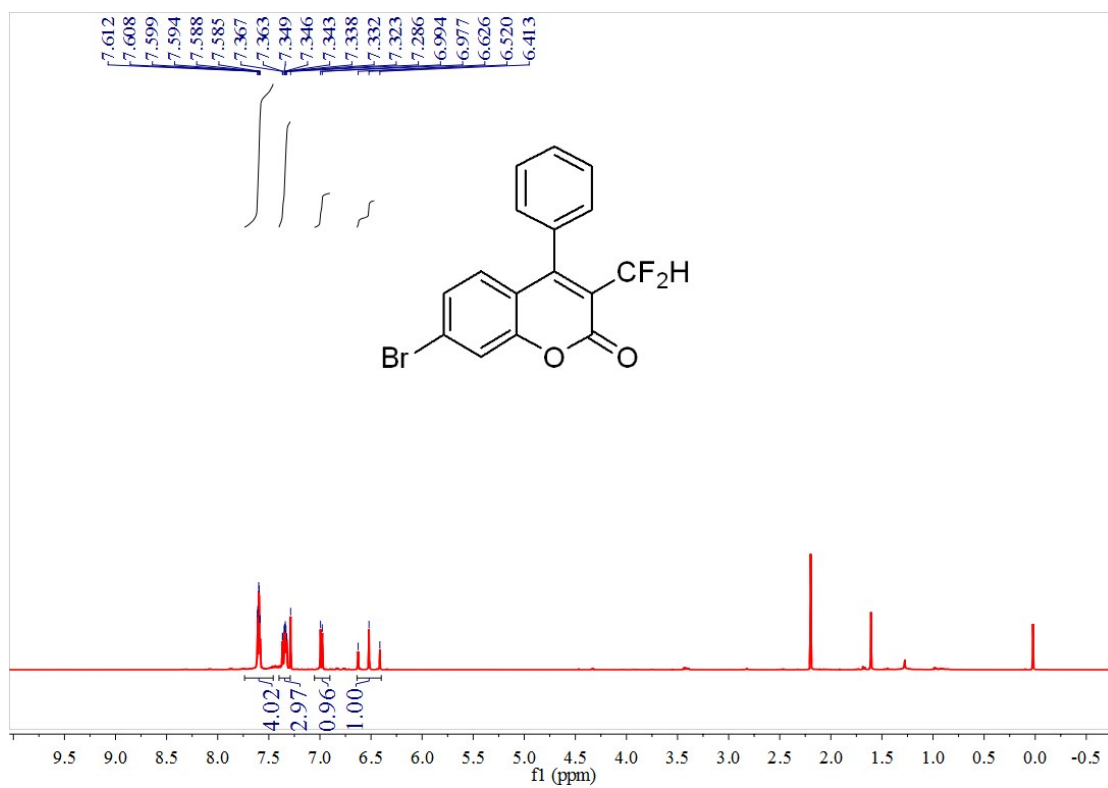

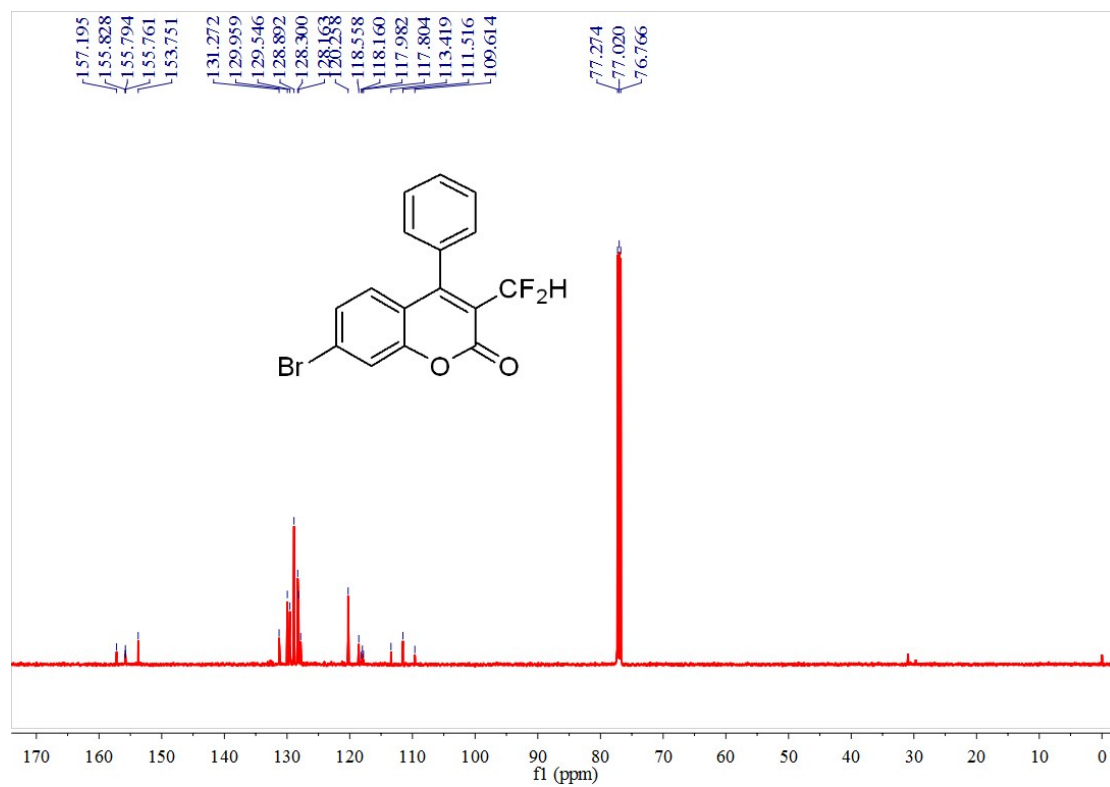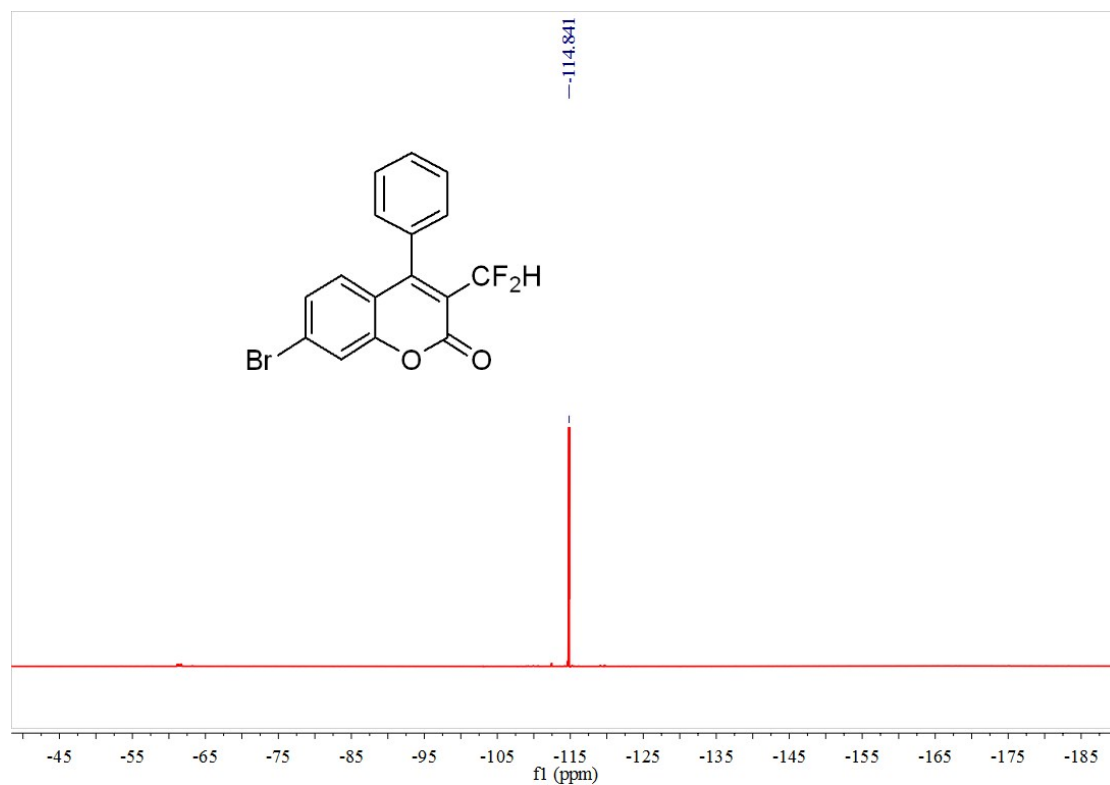

$^1\text{H}$  NMR,  $^{13}\text{C}$  NMR and  $^{19}\text{F}$  NMR spectra of compound **3k**:

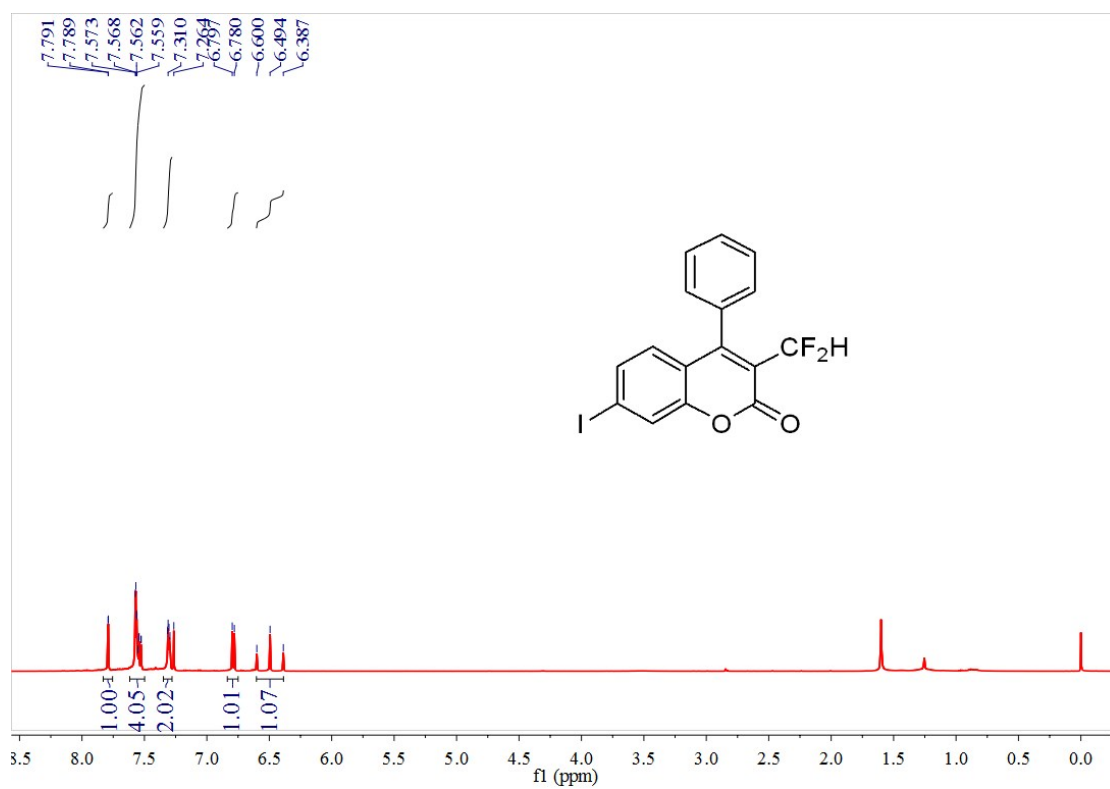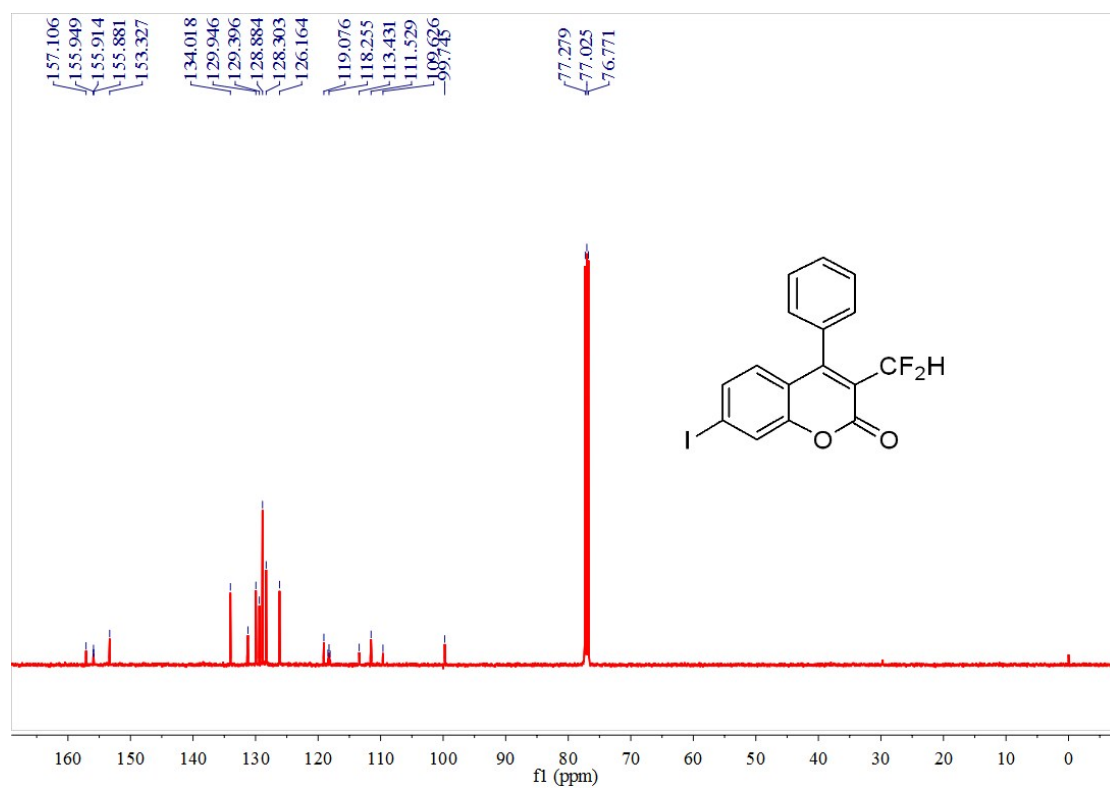

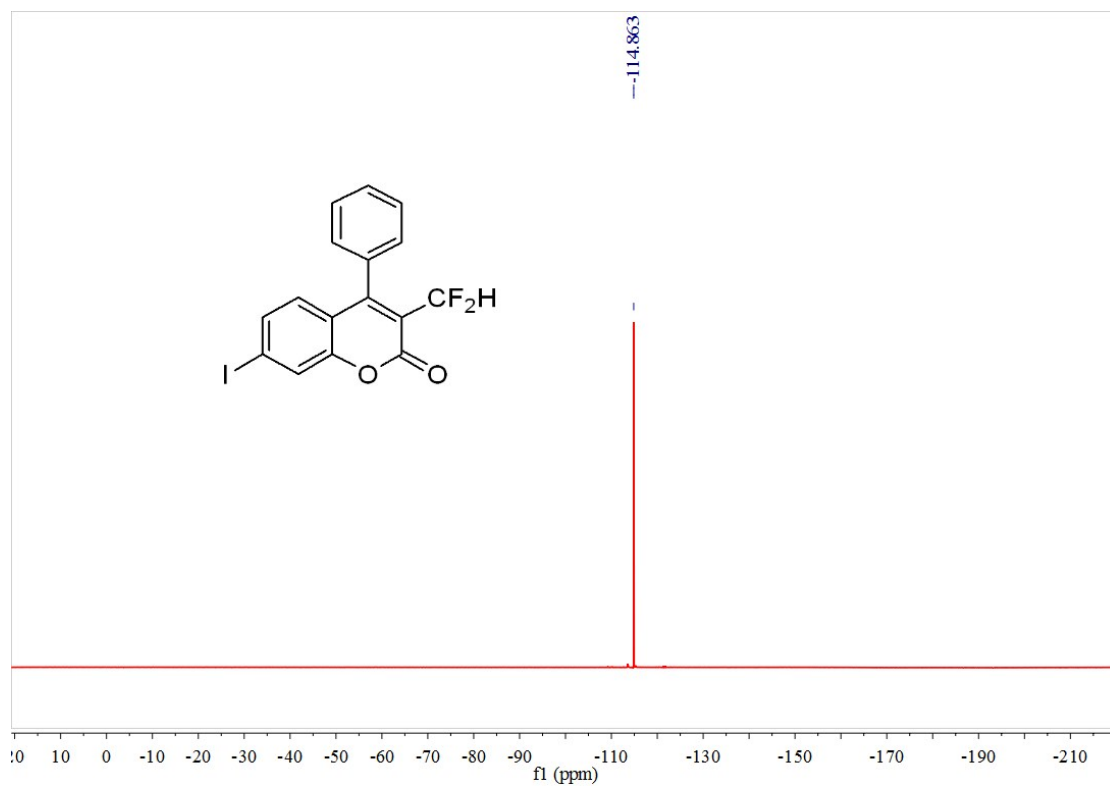

$^1\text{H}$  NMR,  $^{13}\text{C}$  NMR and  $^{19}\text{F}$  NMR spectra of compound **3I**:

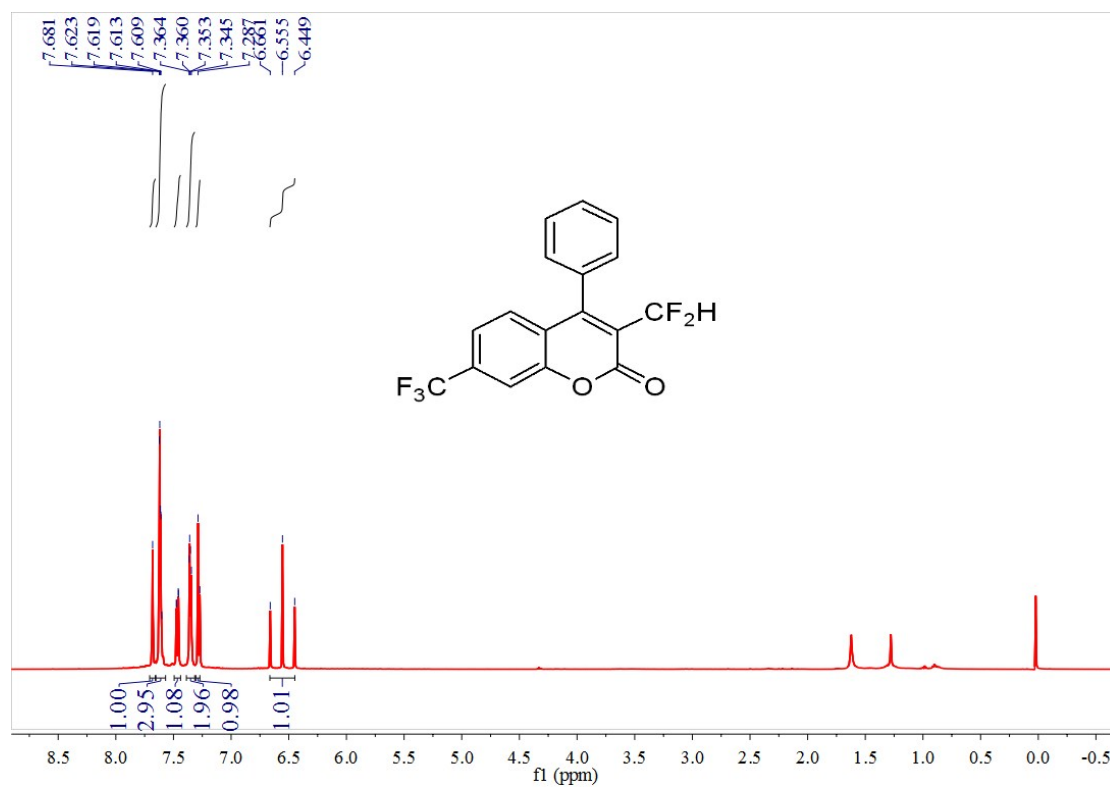

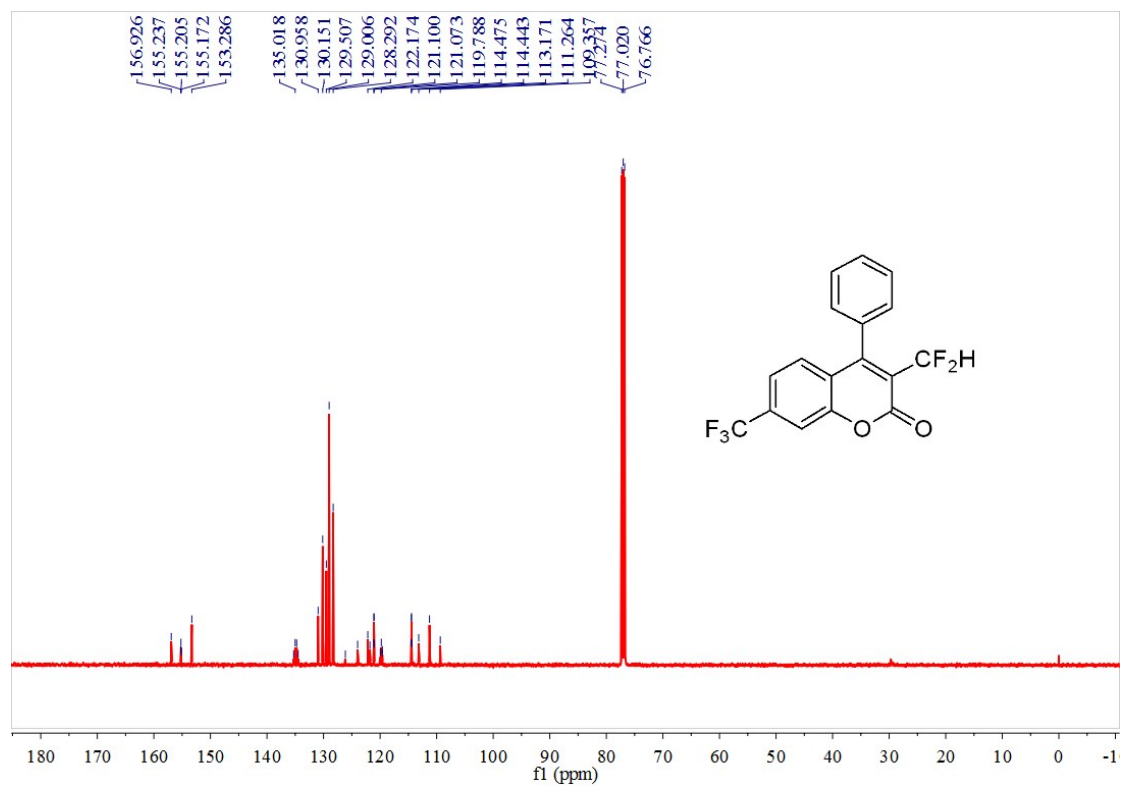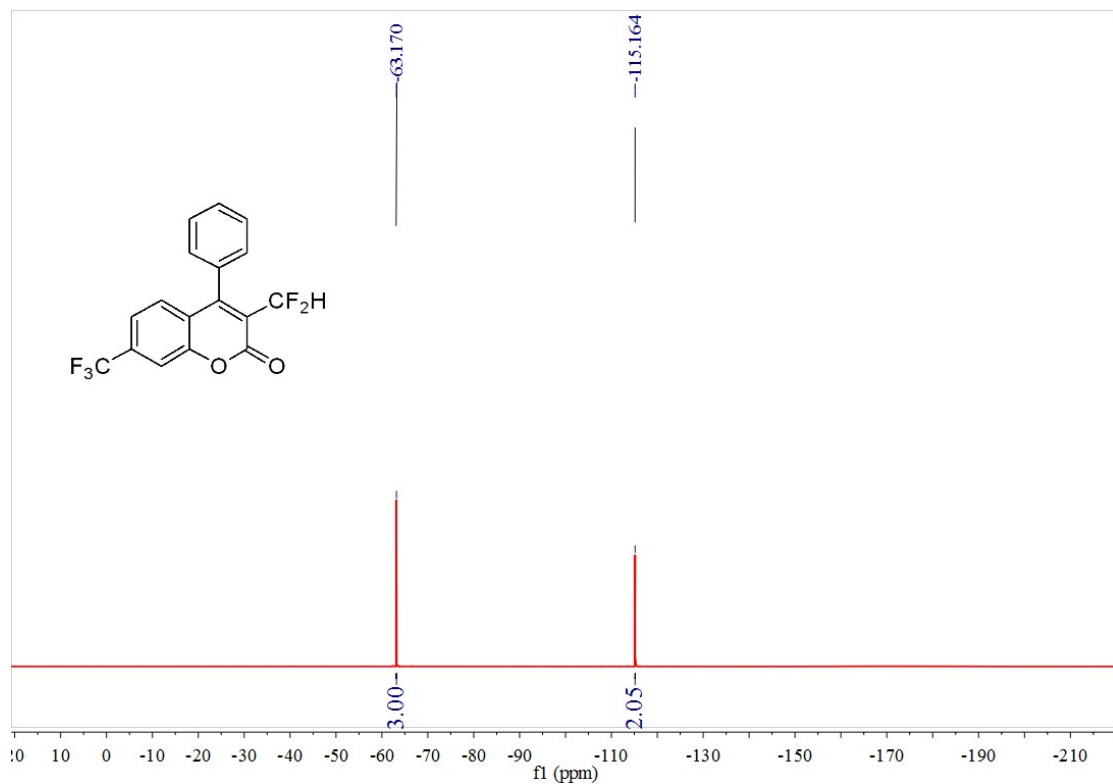



$^1\text{H}$  NMR,  $^{13}\text{C}$  NMR and  $^{19}\text{F}$  NMR spectra of compound **3m**:

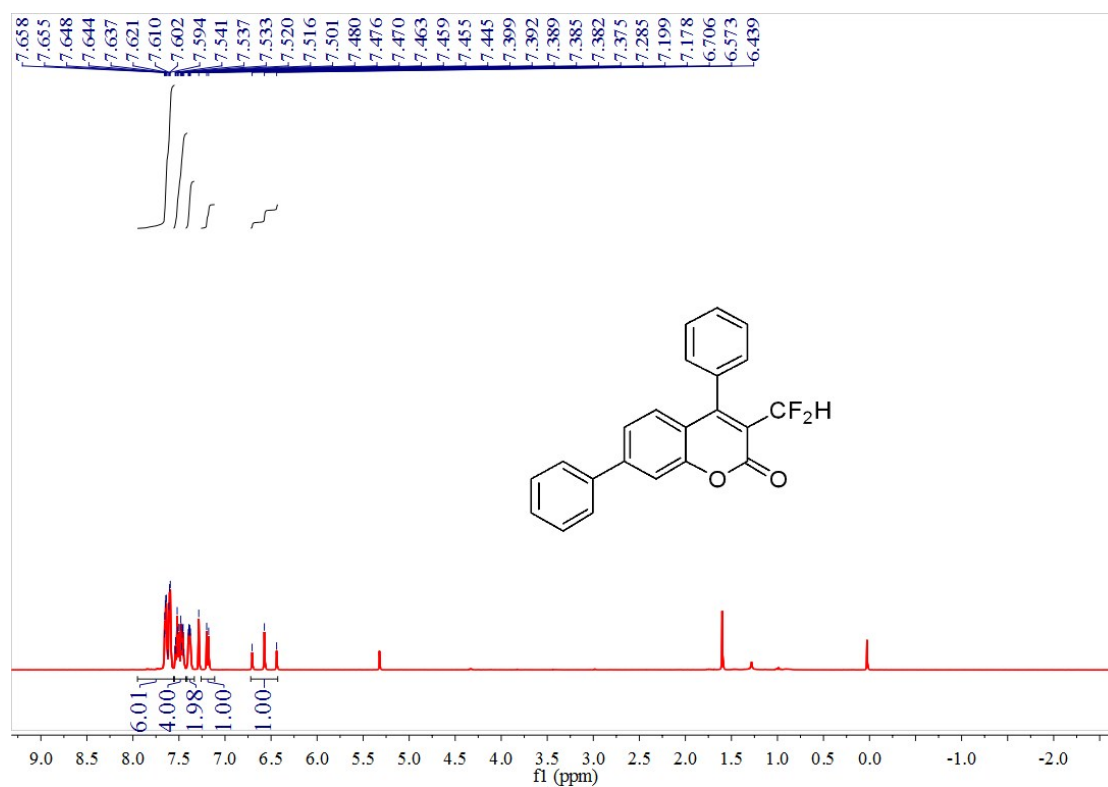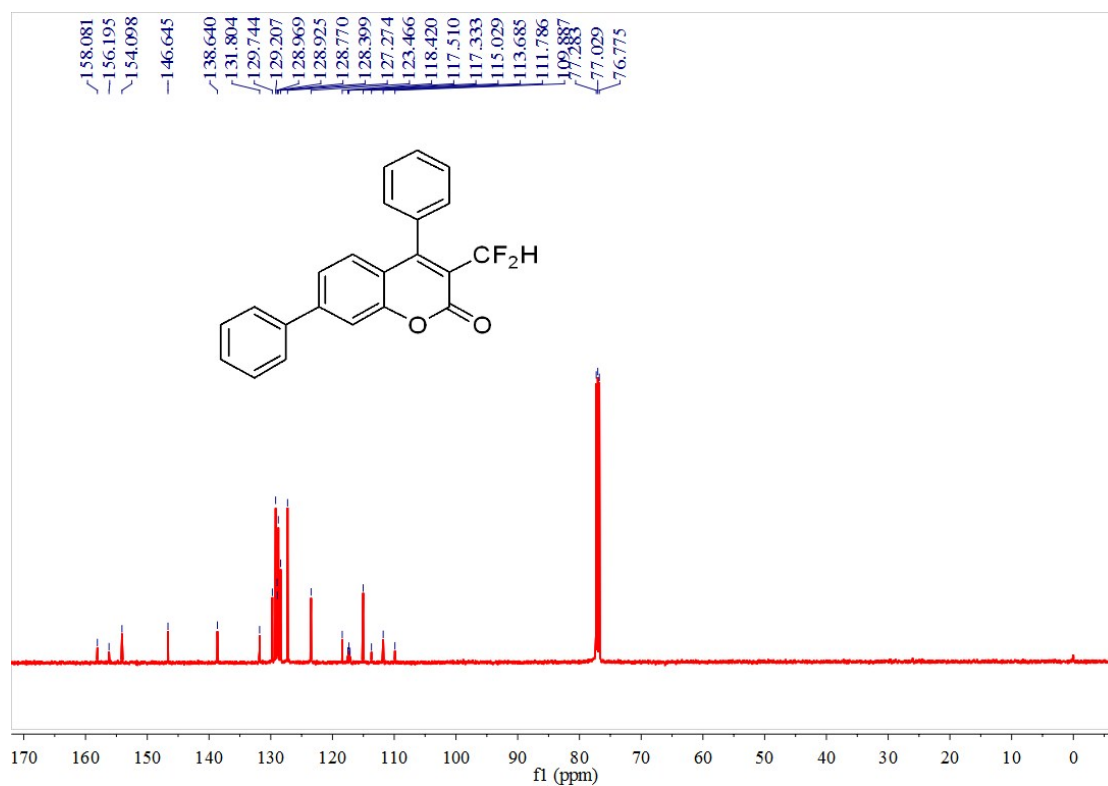

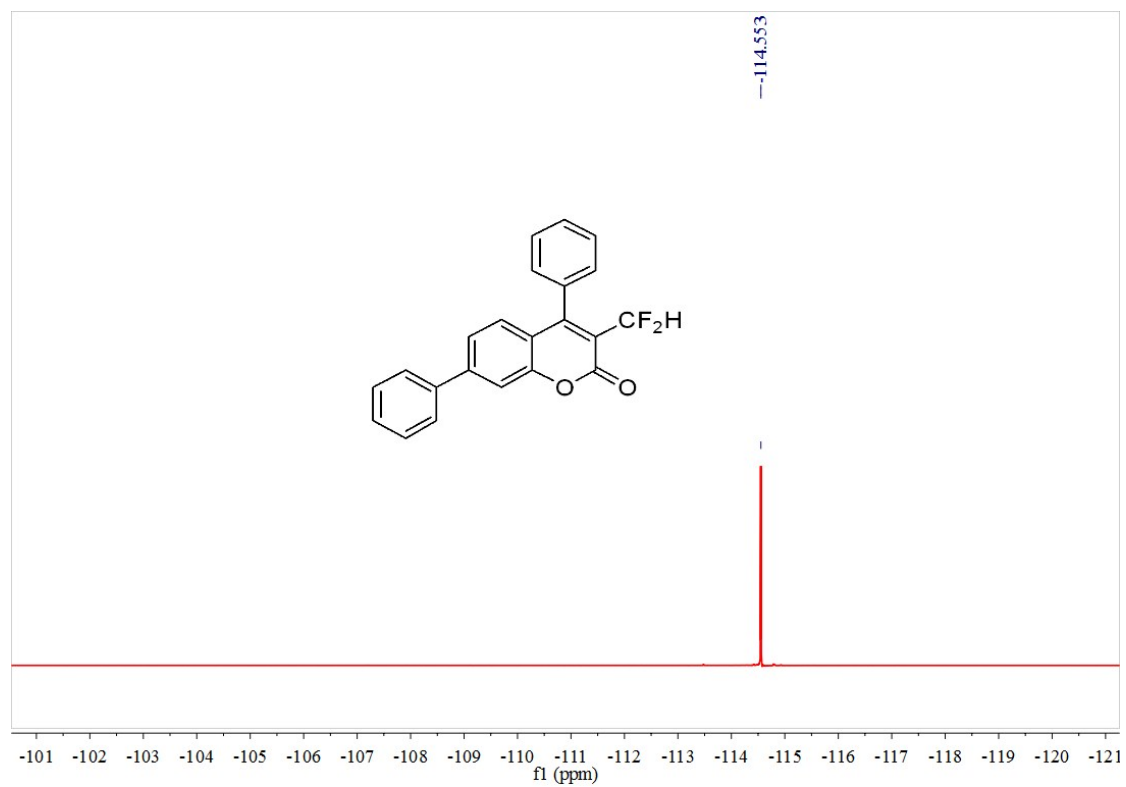

$^1\text{H}$  NMR,  $^{13}\text{C}$  NMR and  $^{19}\text{F}$  NMR spectra of compound **3n**:

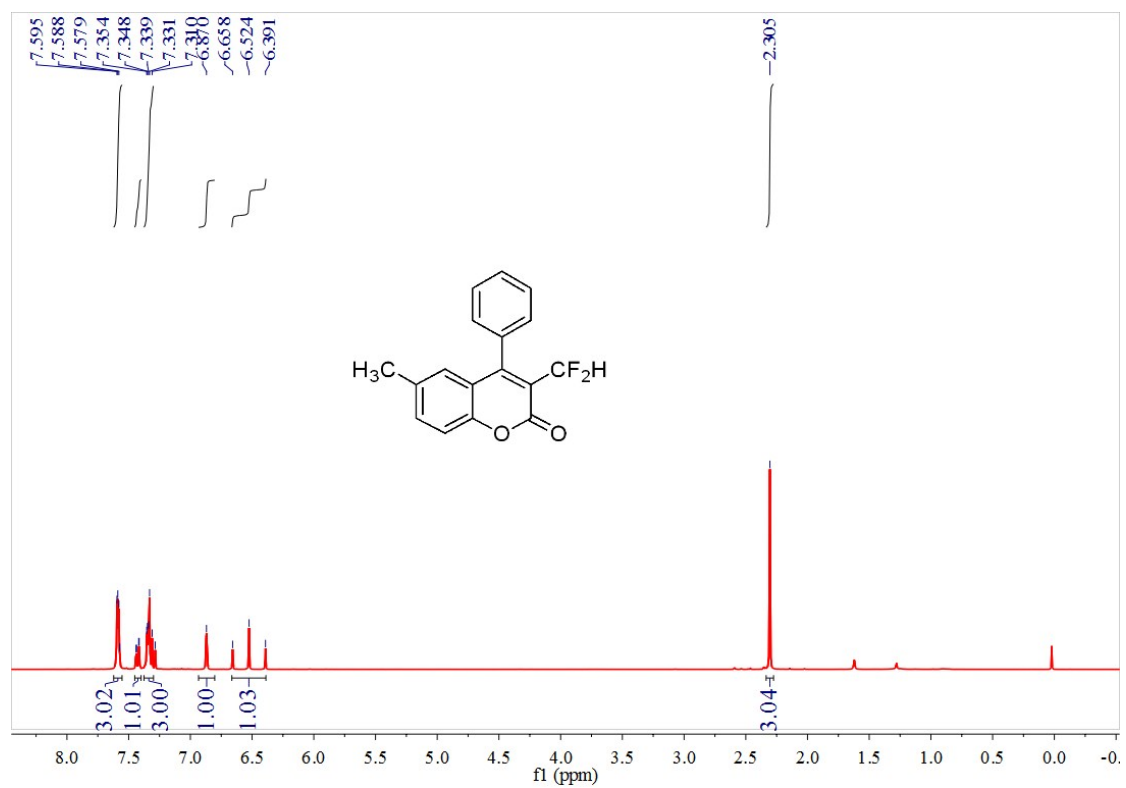

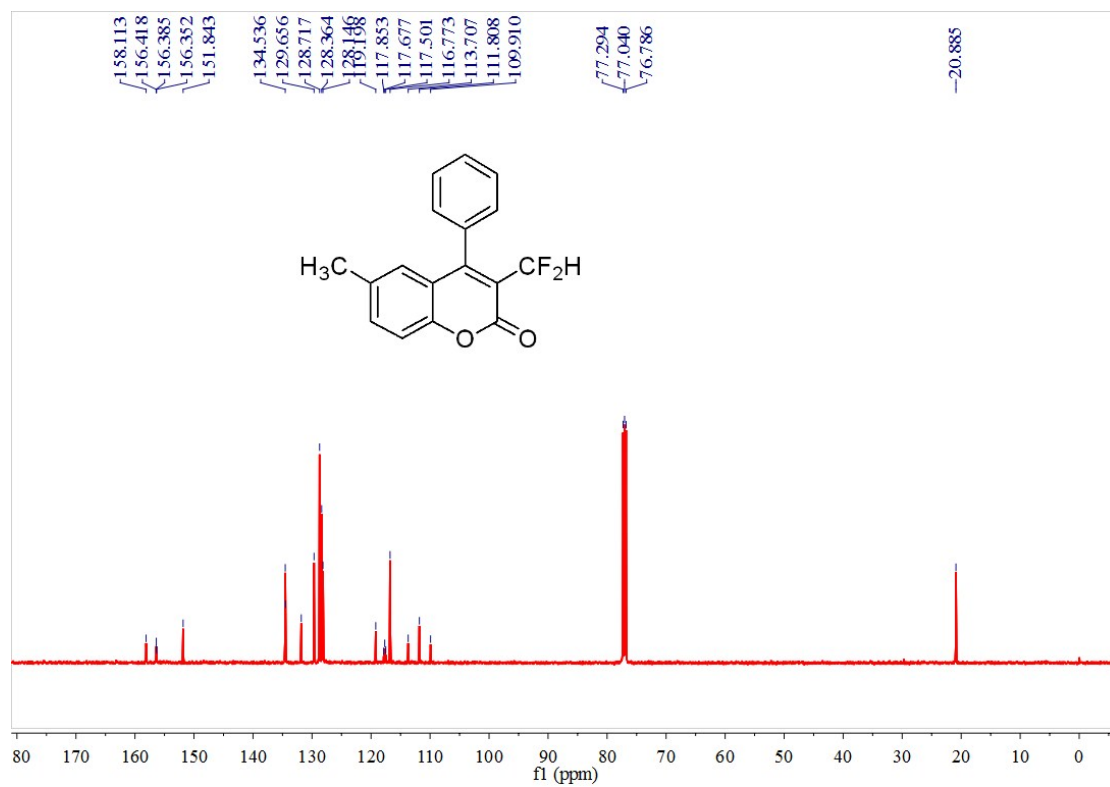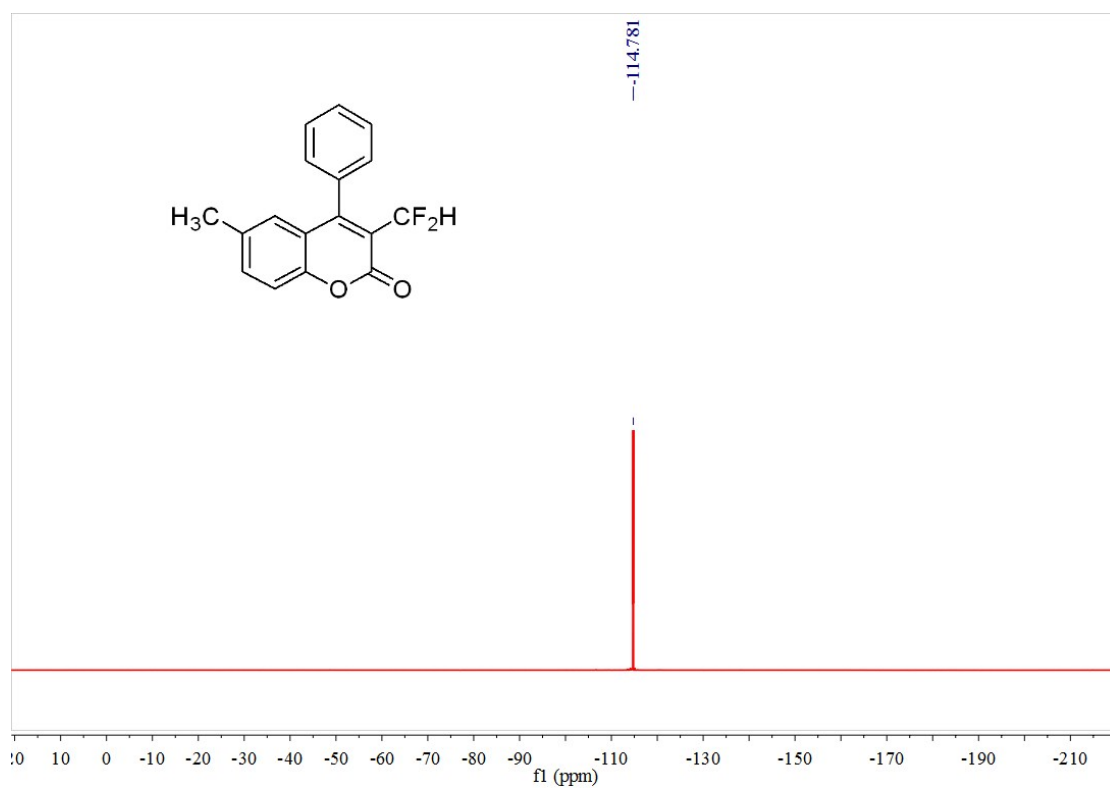

$^1\text{H}$  NMR,  $^{13}\text{C}$  NMR and  $^{19}\text{F}$  NMR spectra of compound **3n'**:

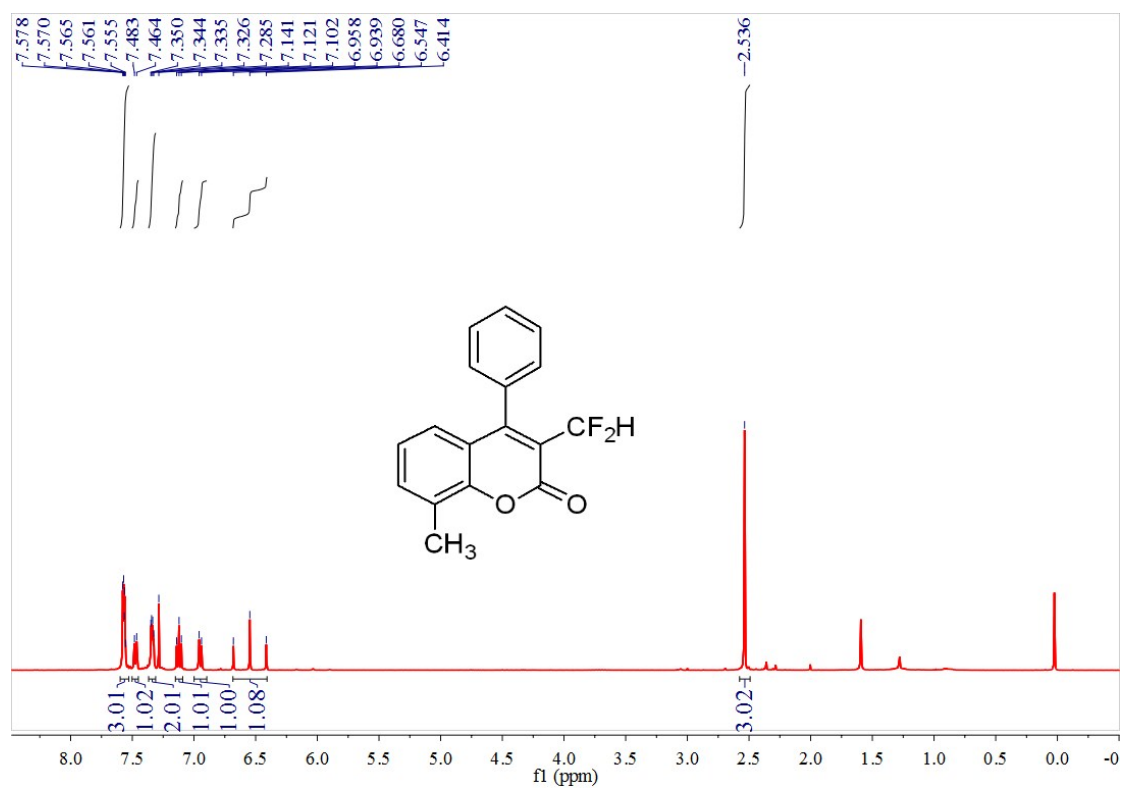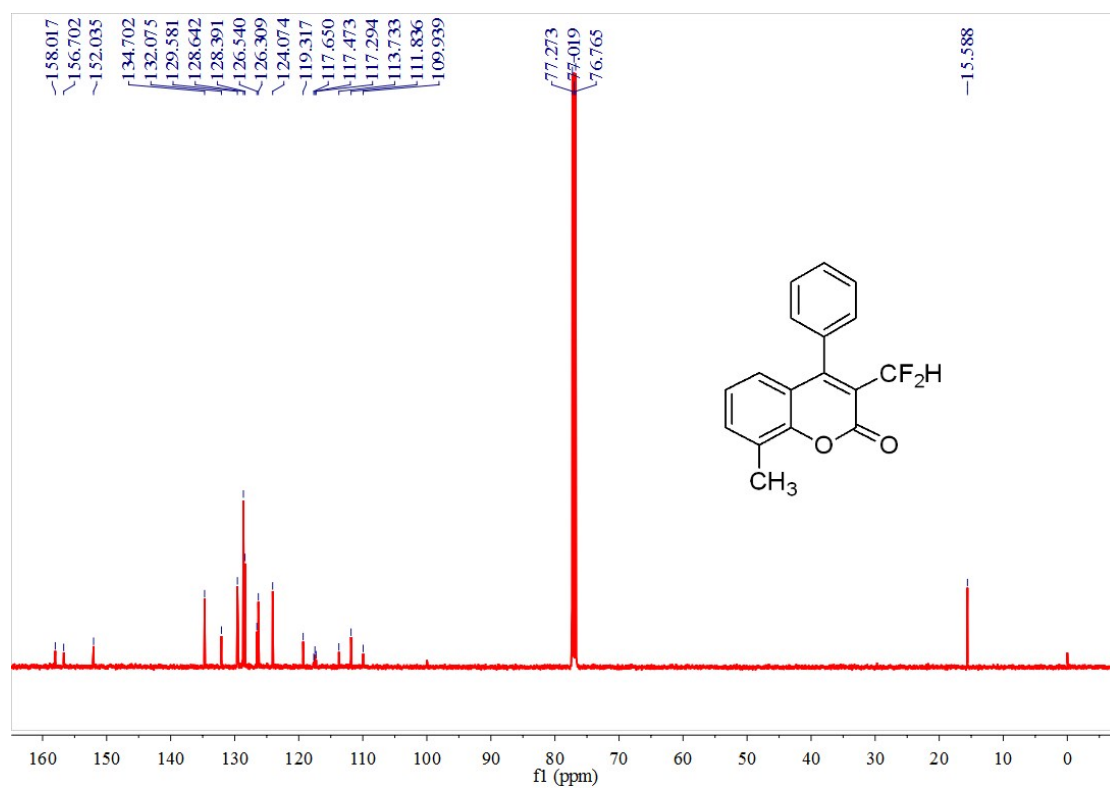

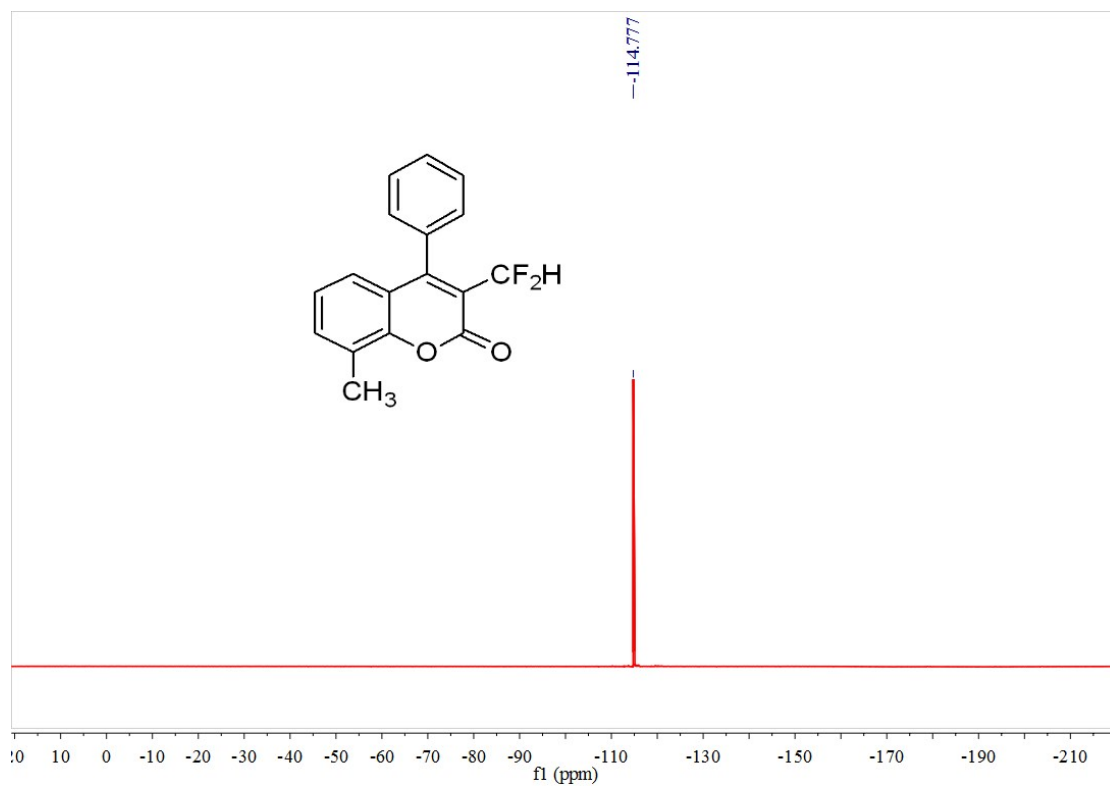

$^1\text{H}$  NMR,  $^{13}\text{C}$  NMR and  $^{19}\text{F}$  NMR spectra of compound **3o**:

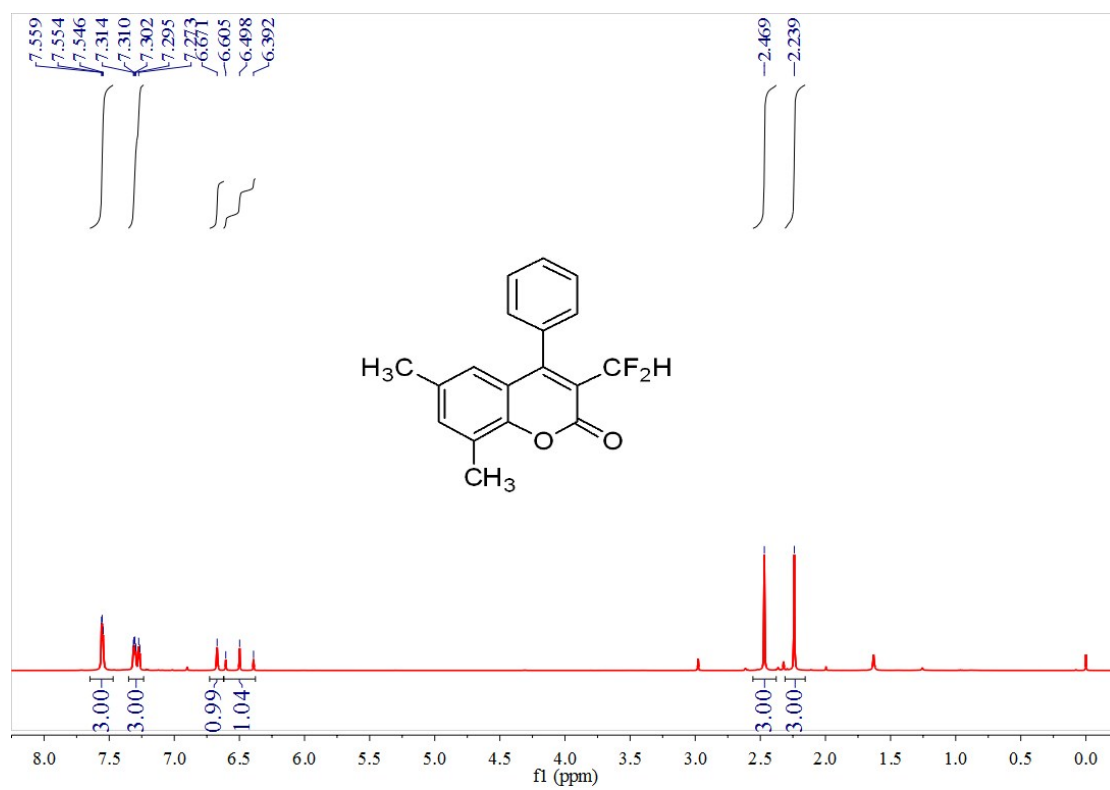

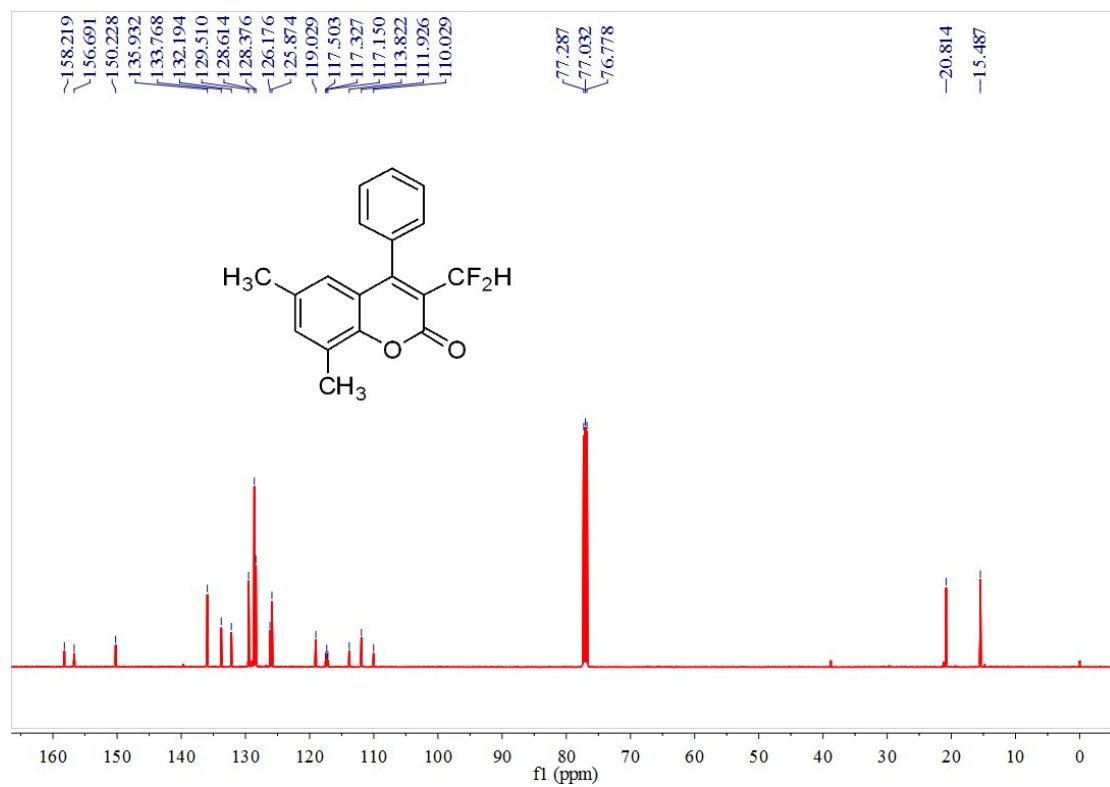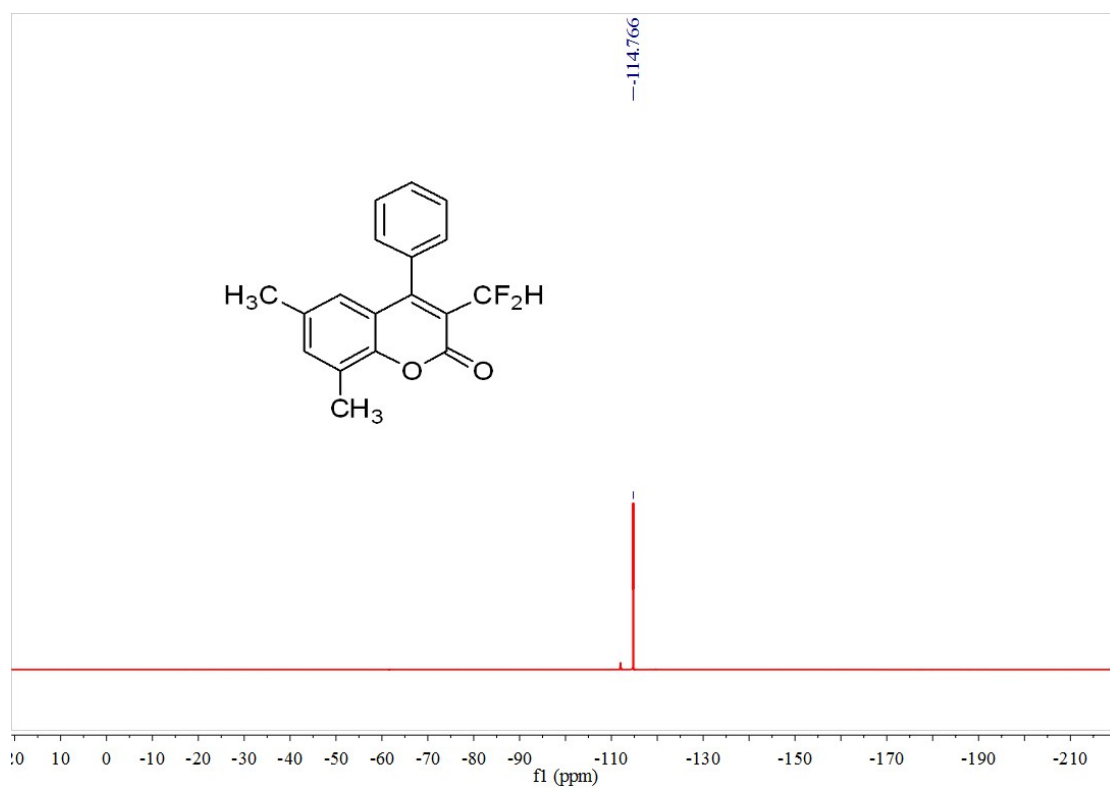

$^1\text{H}$  NMR,  $^{13}\text{C}$  NMR and  $^{19}\text{F}$  NMR spectra of compound **3p**:

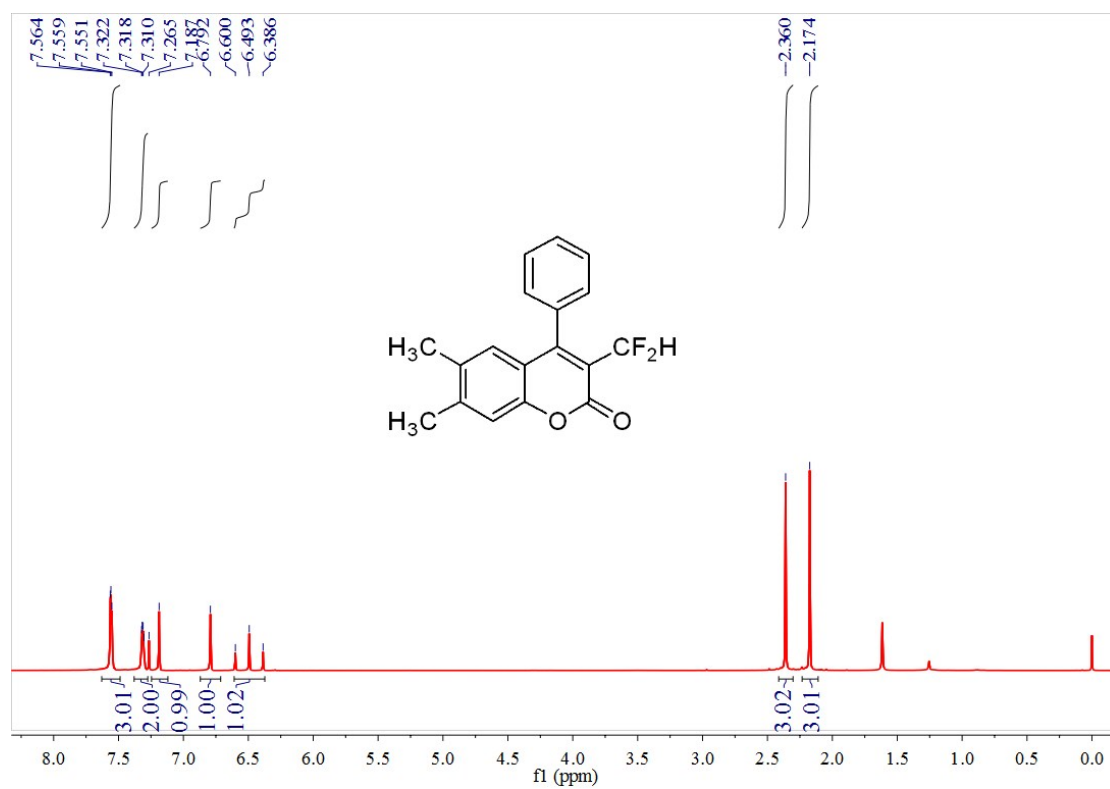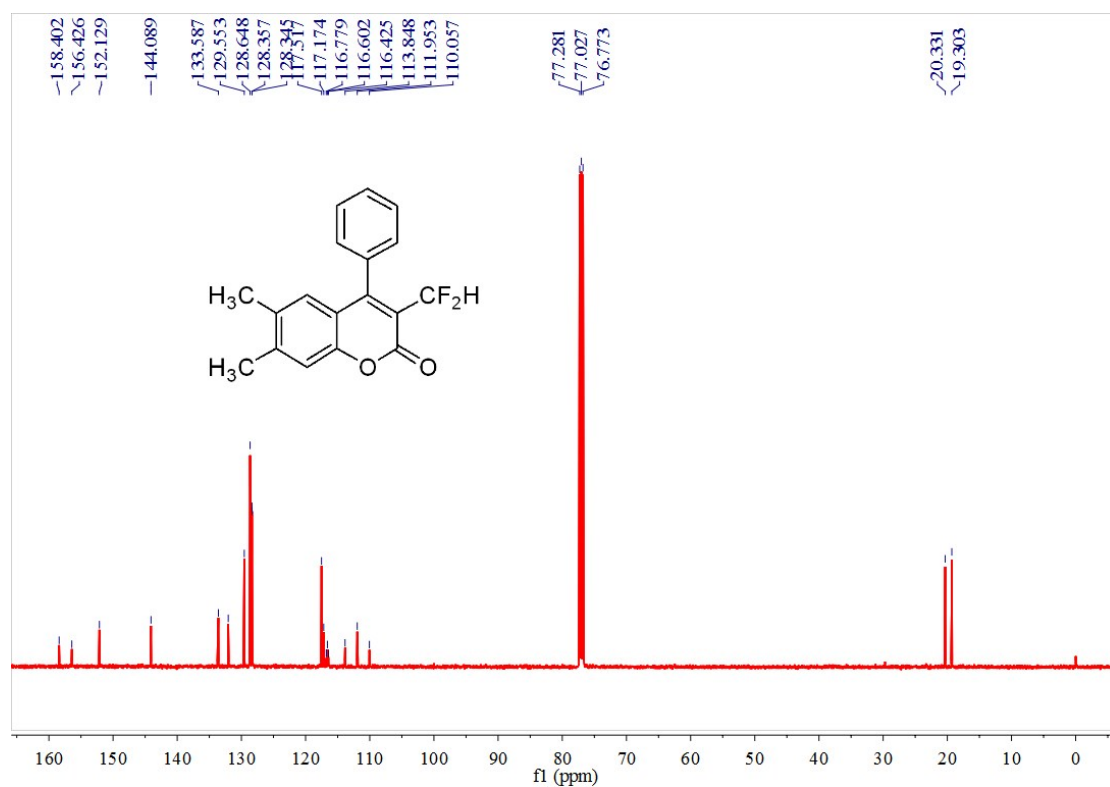

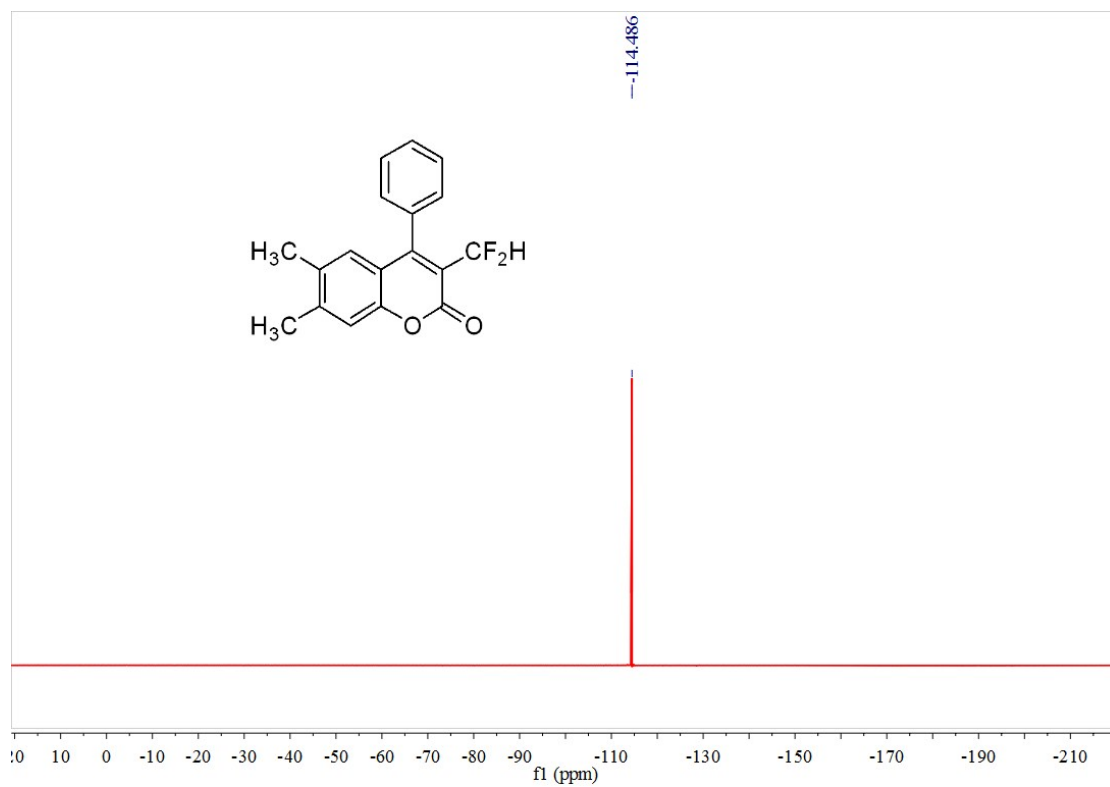

$^1\text{H}$  NMR,  $^{13}\text{C}$  NMR and  $^{19}\text{F}$  NMR spectra of compound **3s**:

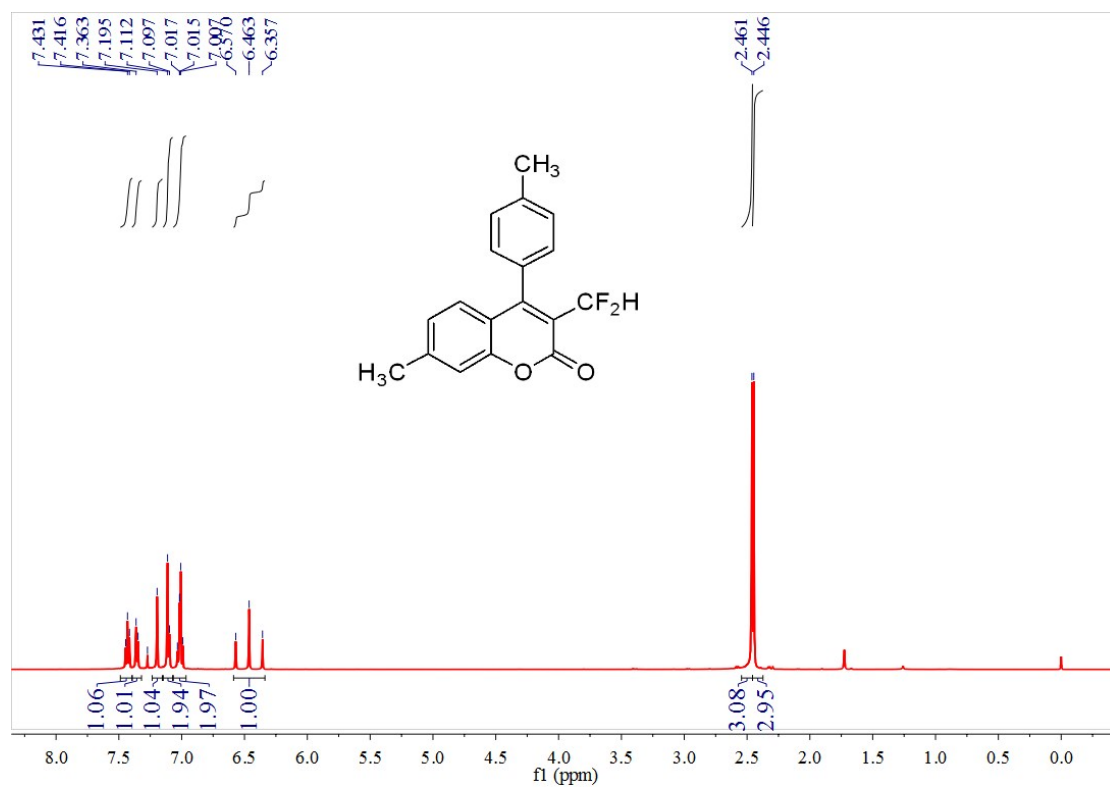



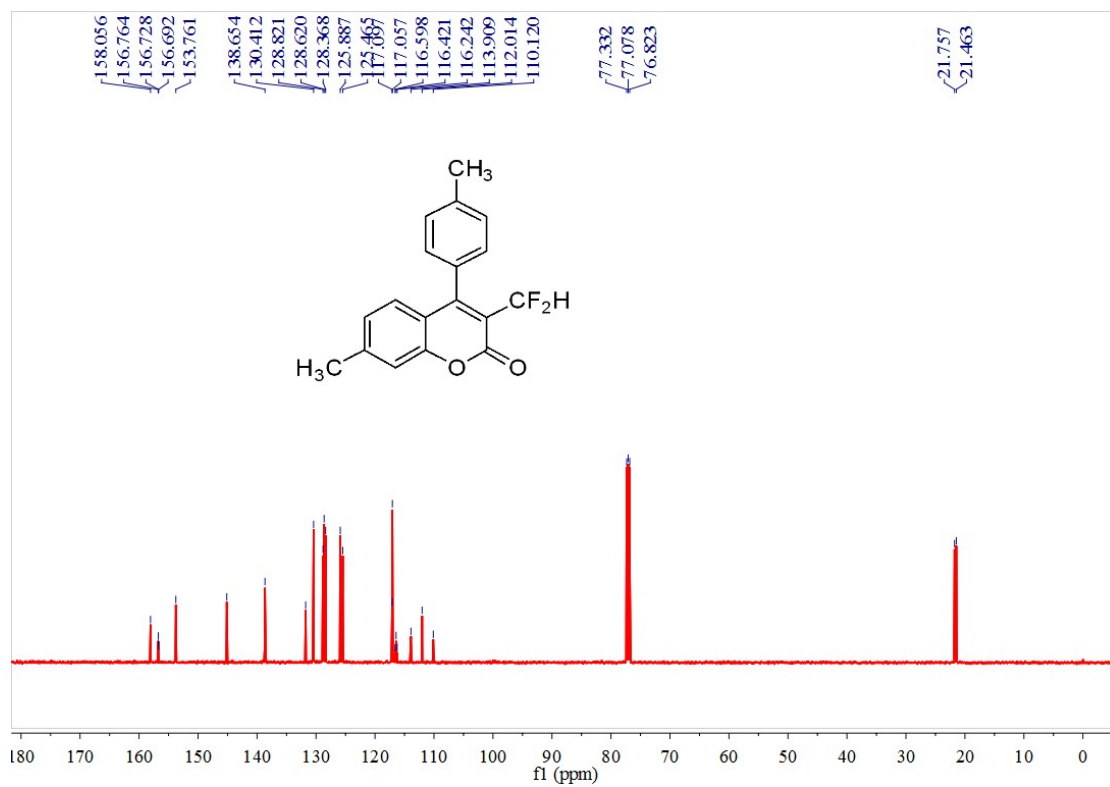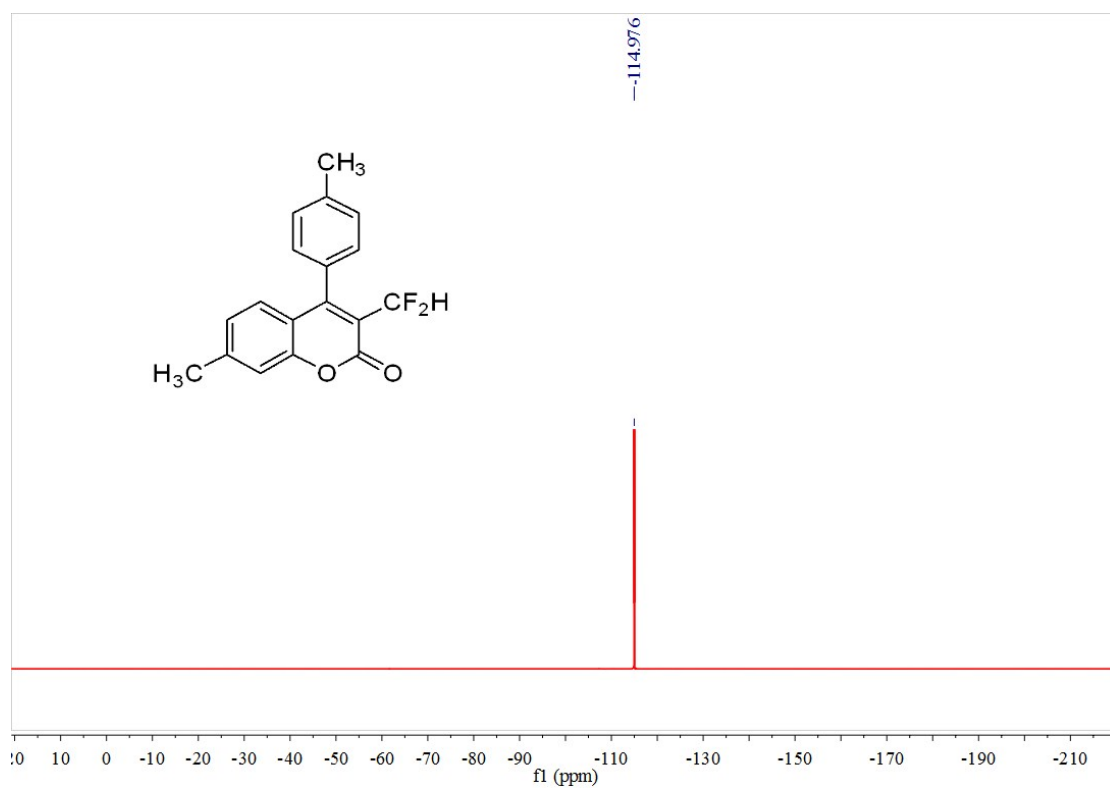

$^1\text{H}$  NMR,  $^{13}\text{C}$  NMR and  $^{19}\text{F}$  NMR spectra of compound **3t**:

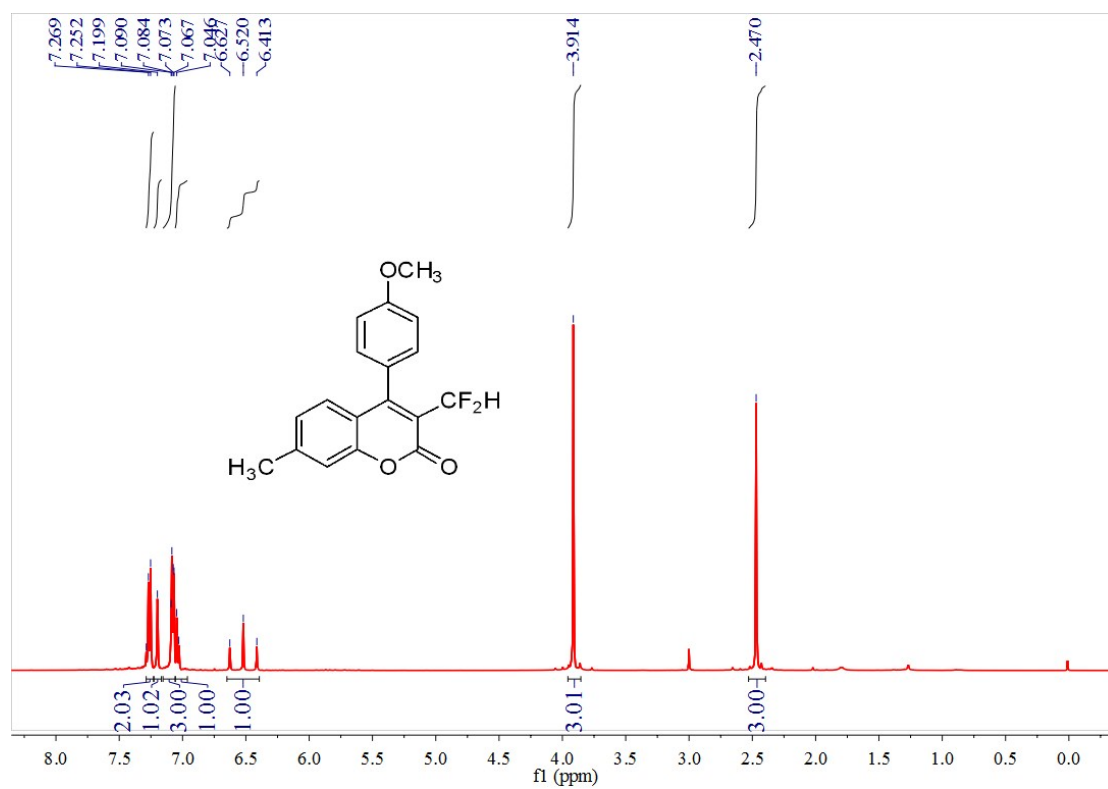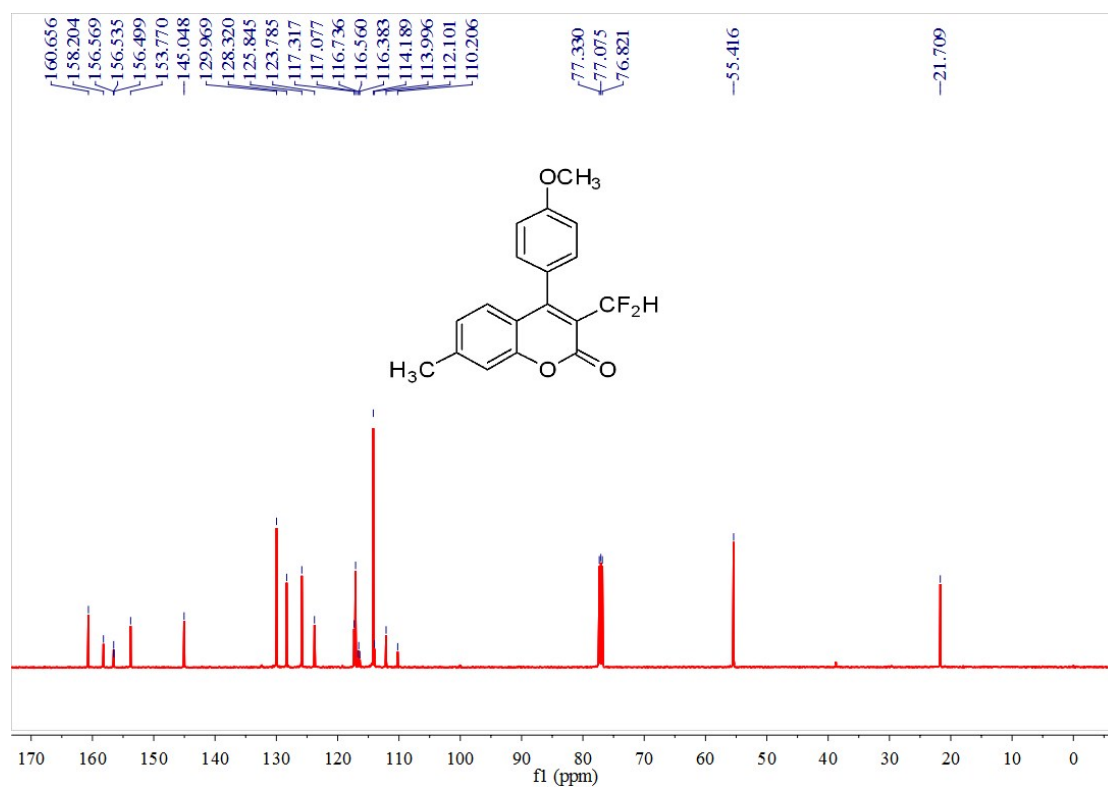

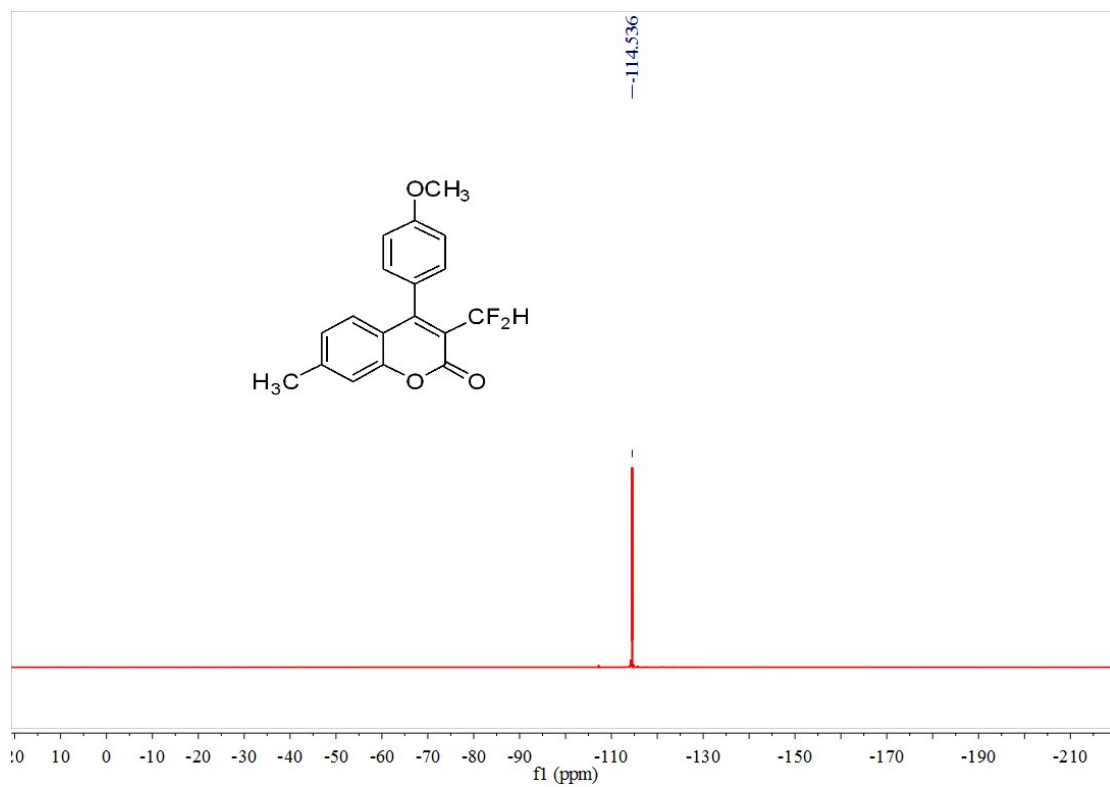

$^1\text{H}$  NMR,  $^{13}\text{C}$  NMR and  $^{19}\text{F}$  NMR spectra of compound **3u**:

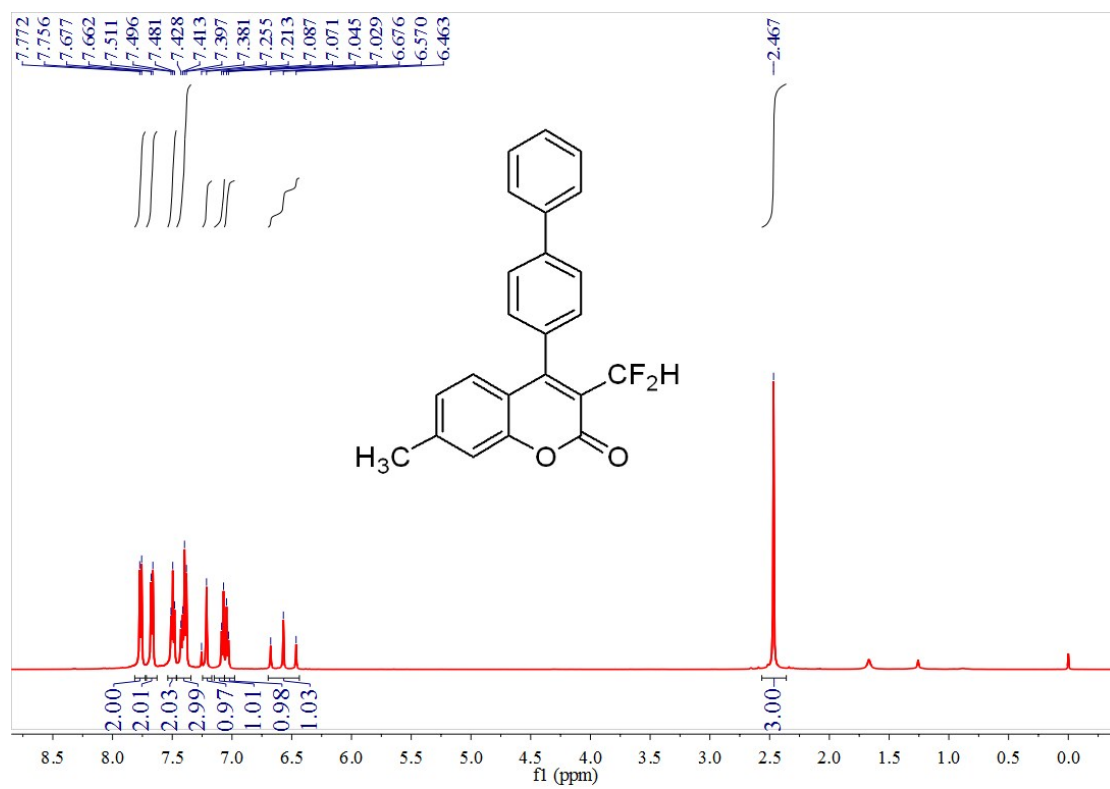

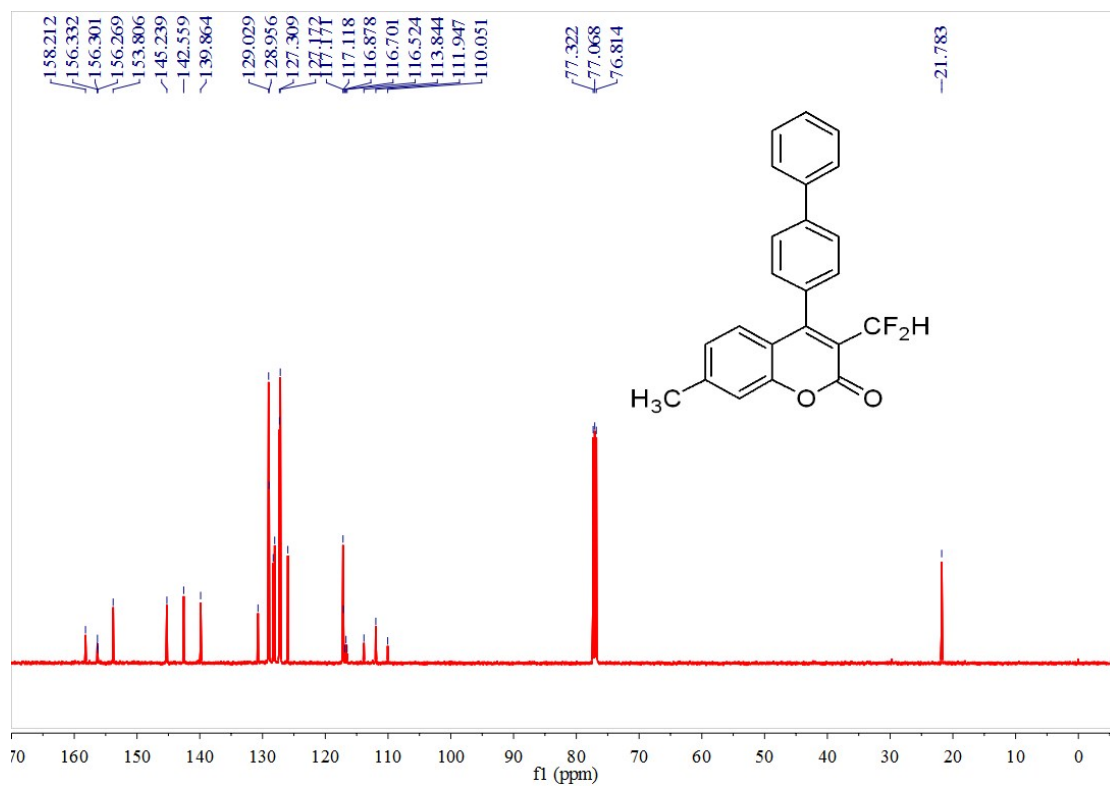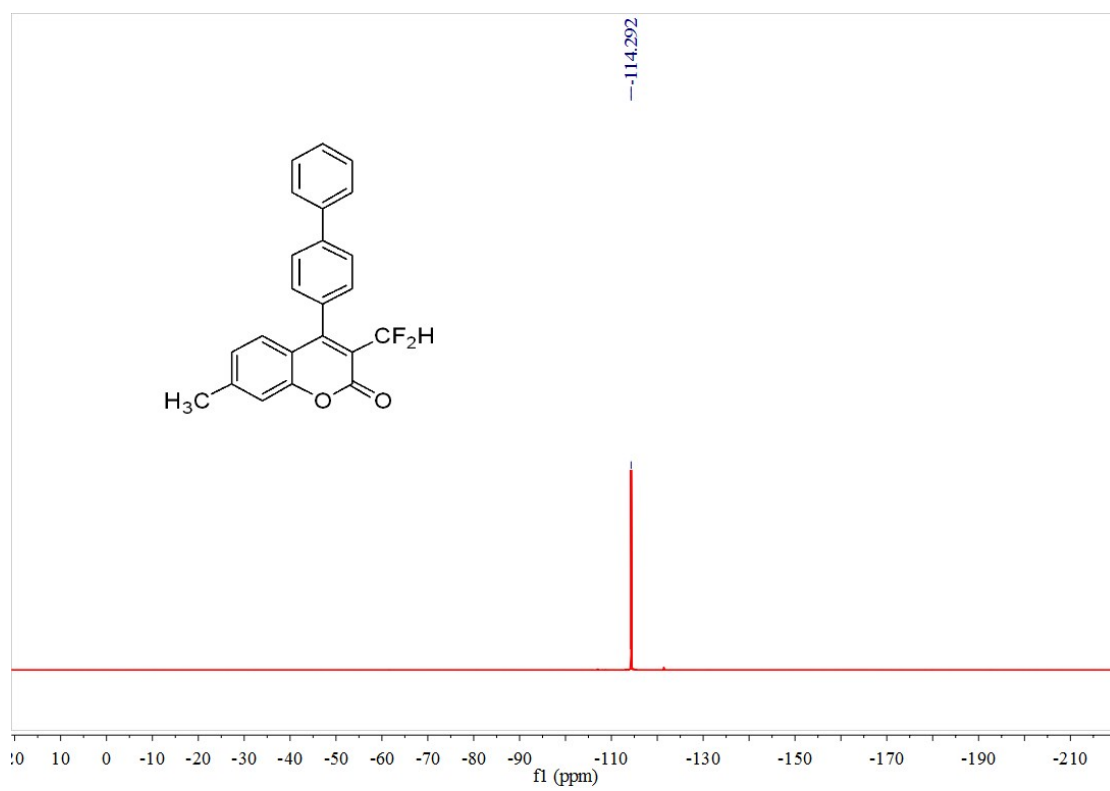

<sup>1</sup>H NMR, <sup>13</sup>C NMR and <sup>19</sup>F NMR spectra of compound **3v**:

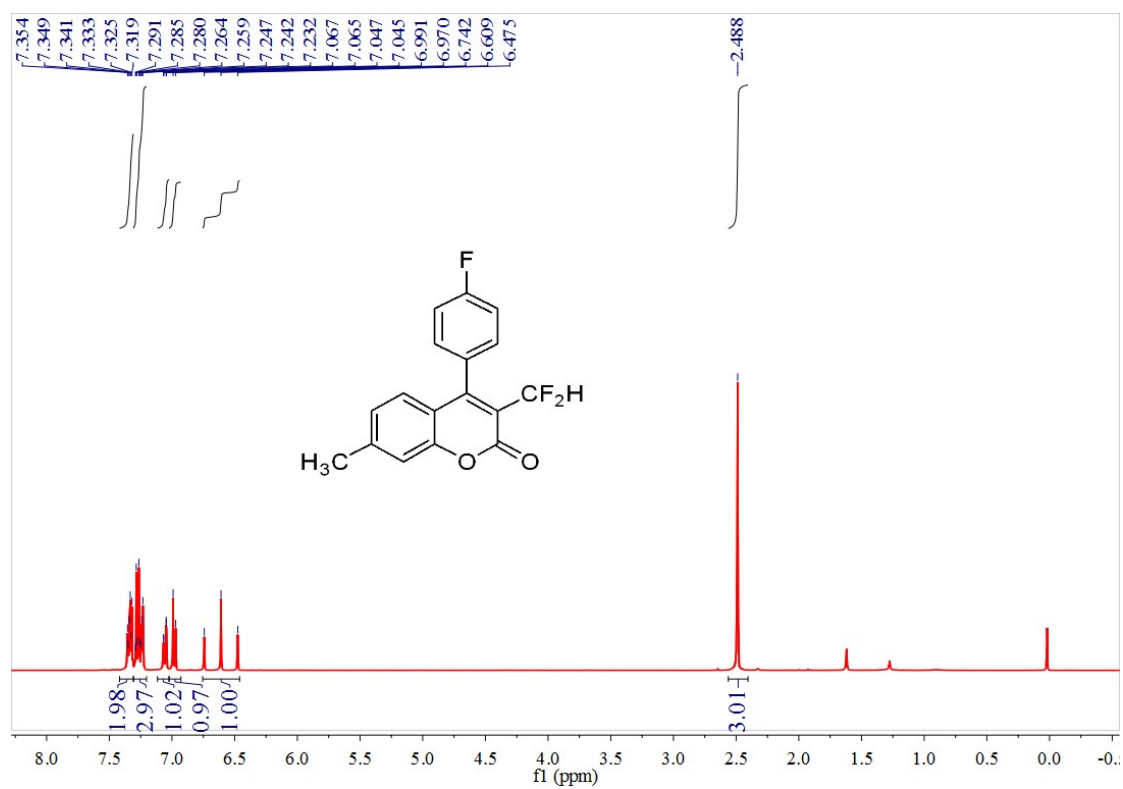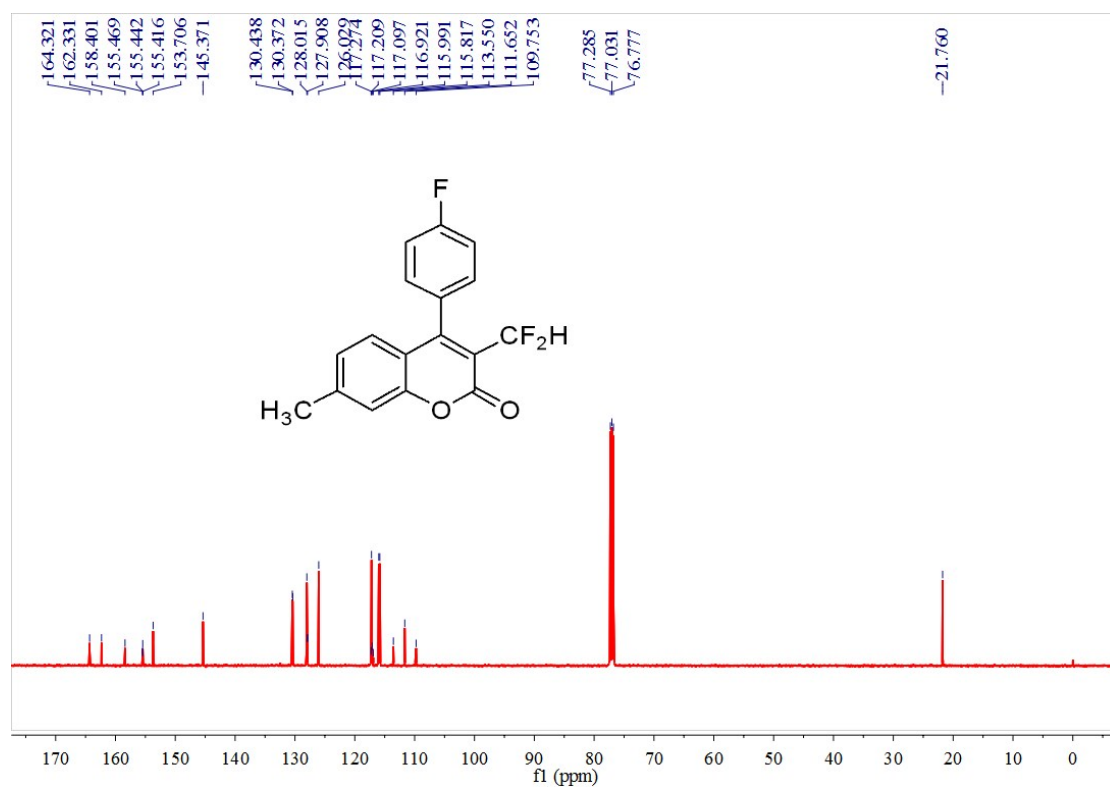

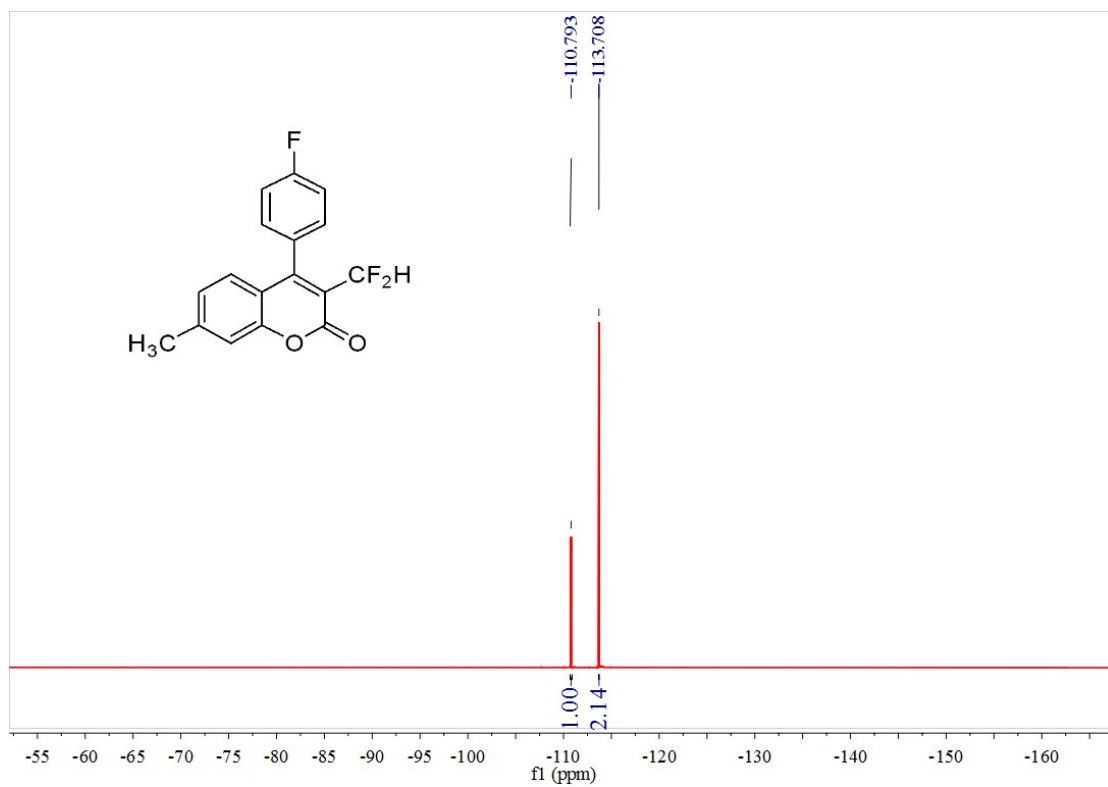

$^1\text{H}$  NMR,  $^{13}\text{C}$  NMR and  $^{19}\text{F}$  NMR spectra of compound **3w**:

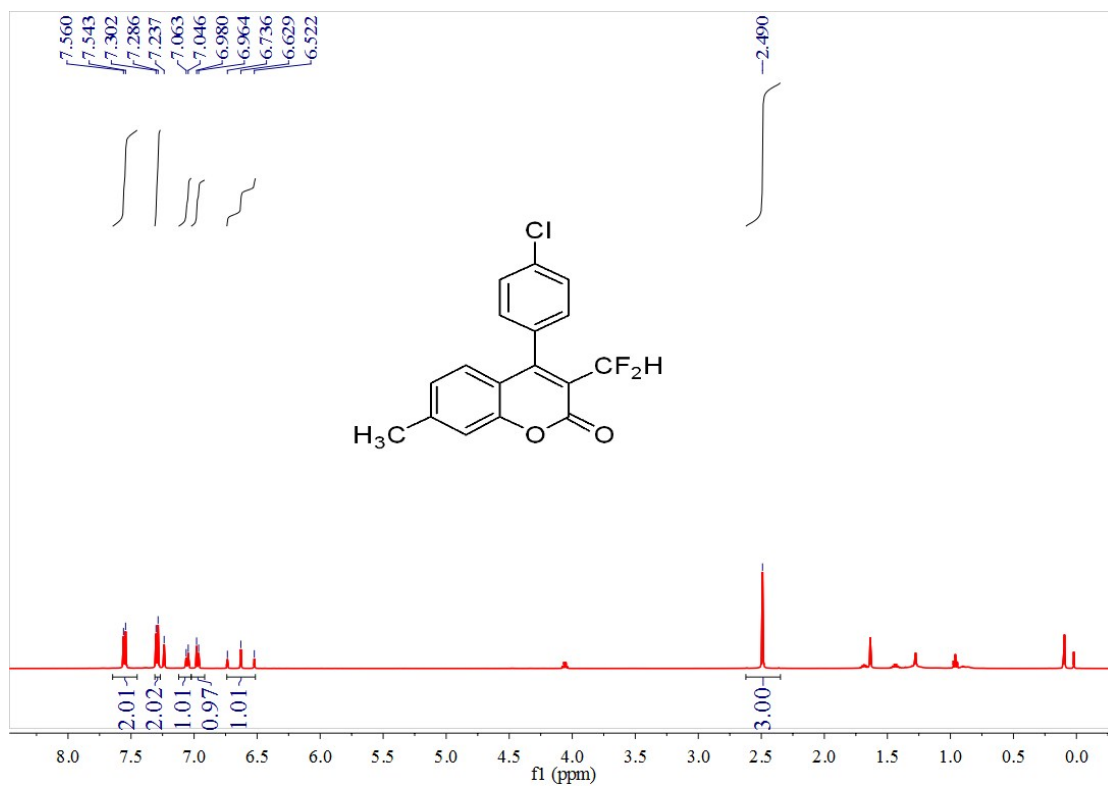

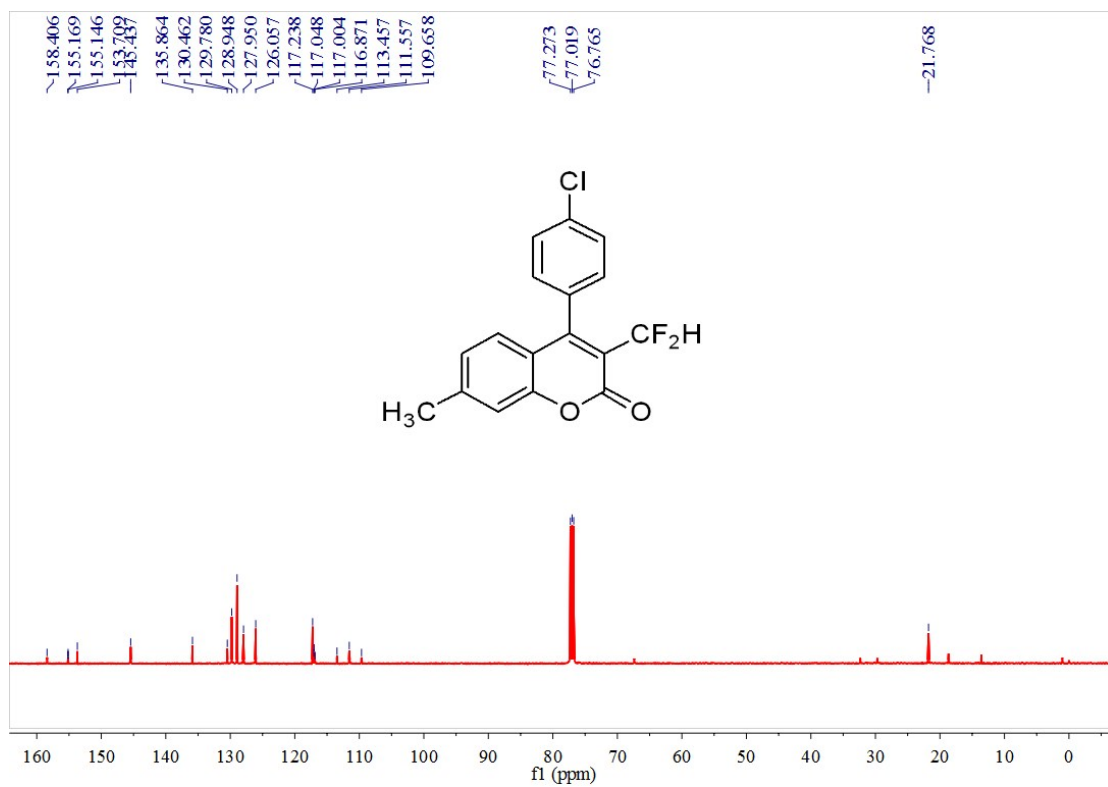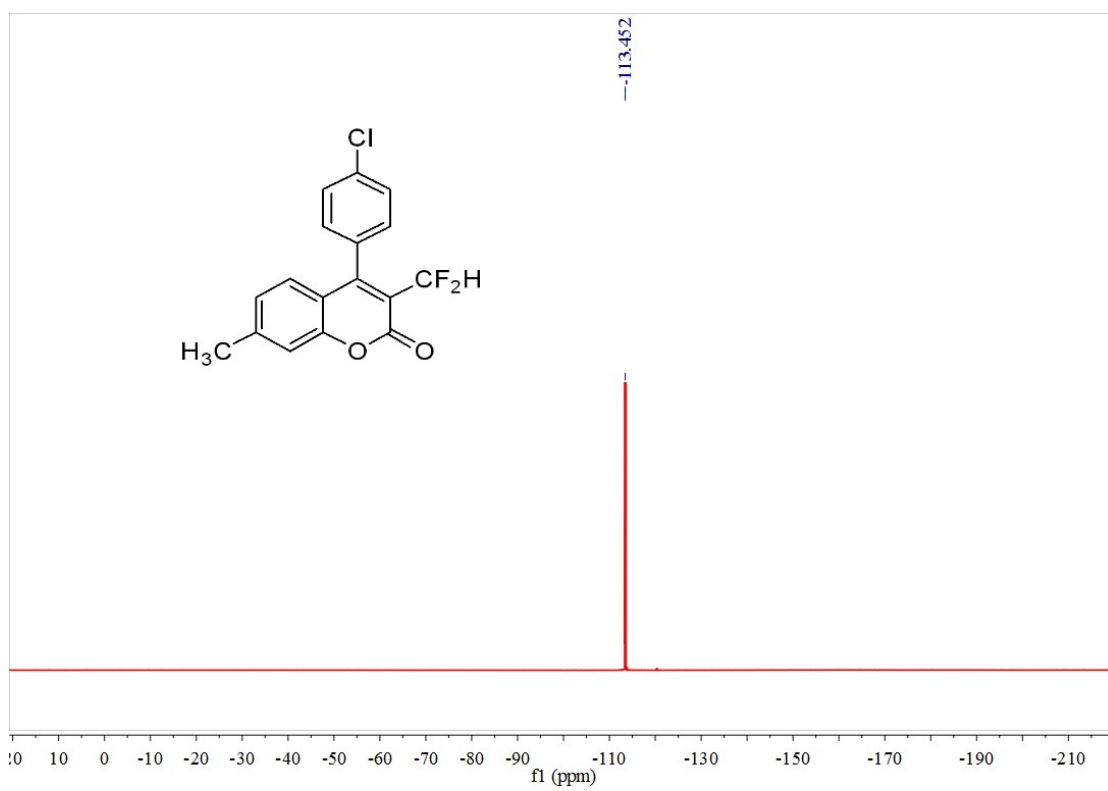

$^1\text{H}$  NMR,  $^{13}\text{C}$  NMR and  $^{19}\text{F}$  NMR spectra of compound **3x**:

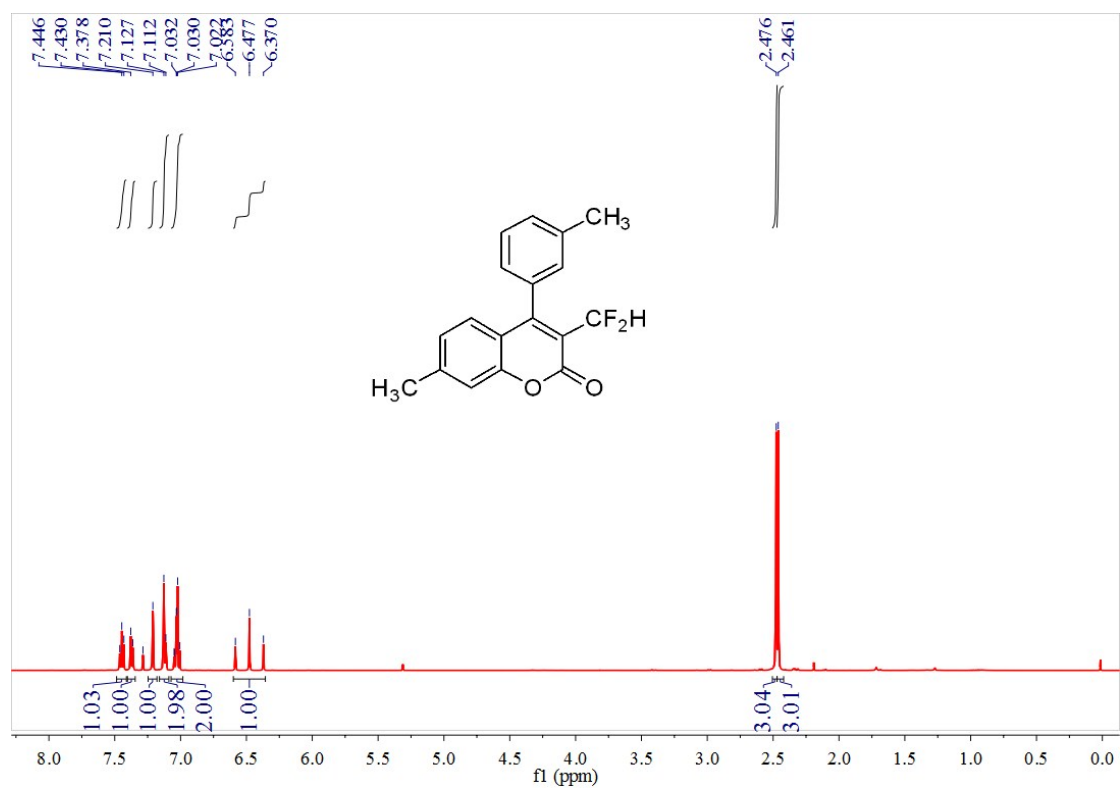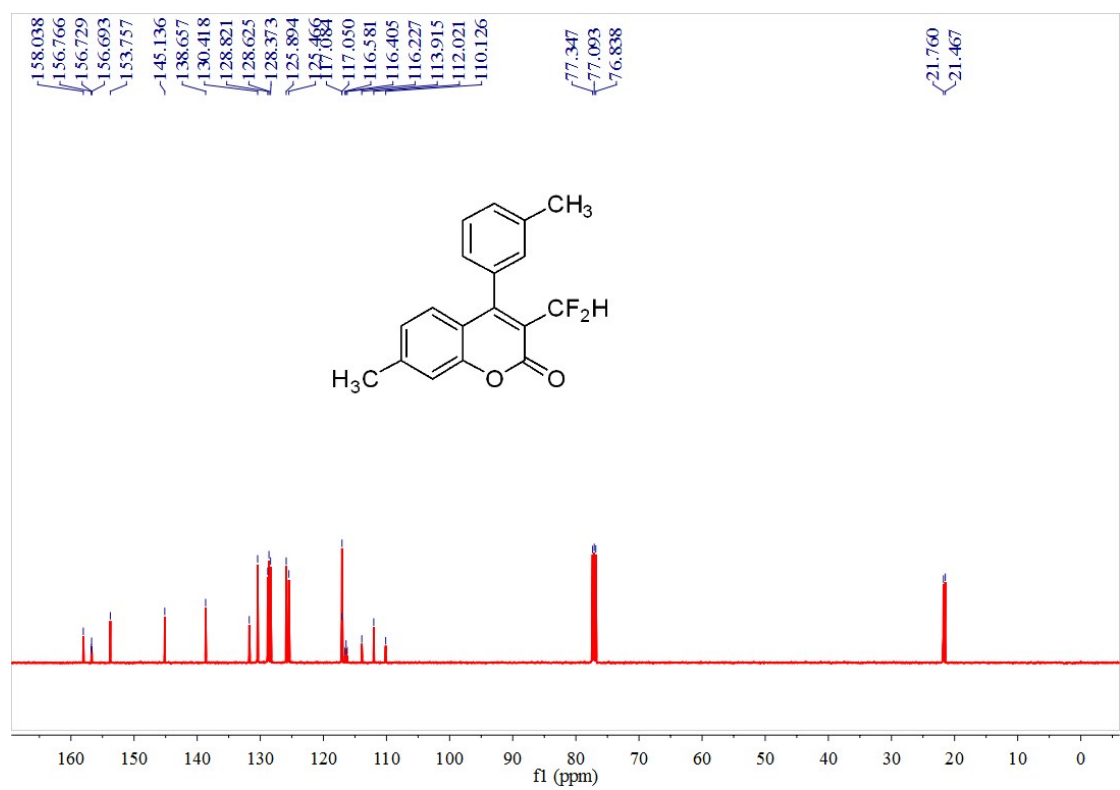



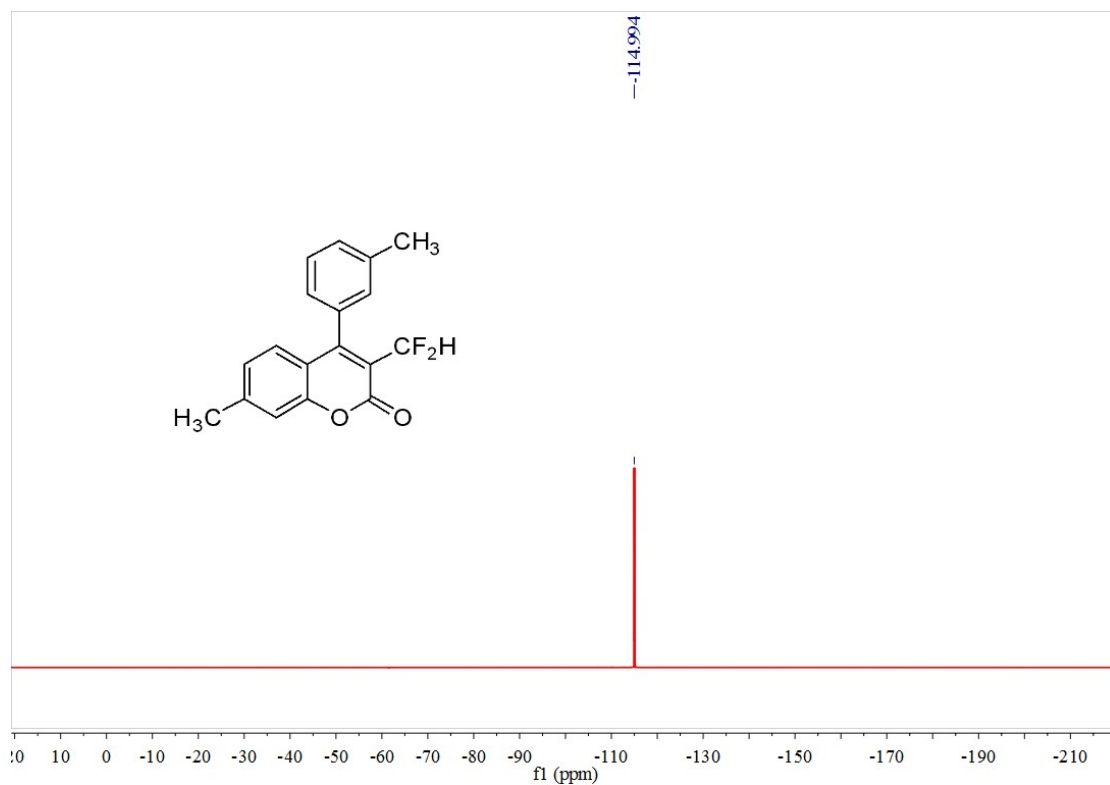

$^1\text{H}$  NMR,  $^{13}\text{C}$  NMR and  $^{19}\text{F}$  NMR spectra of compound **3y**:

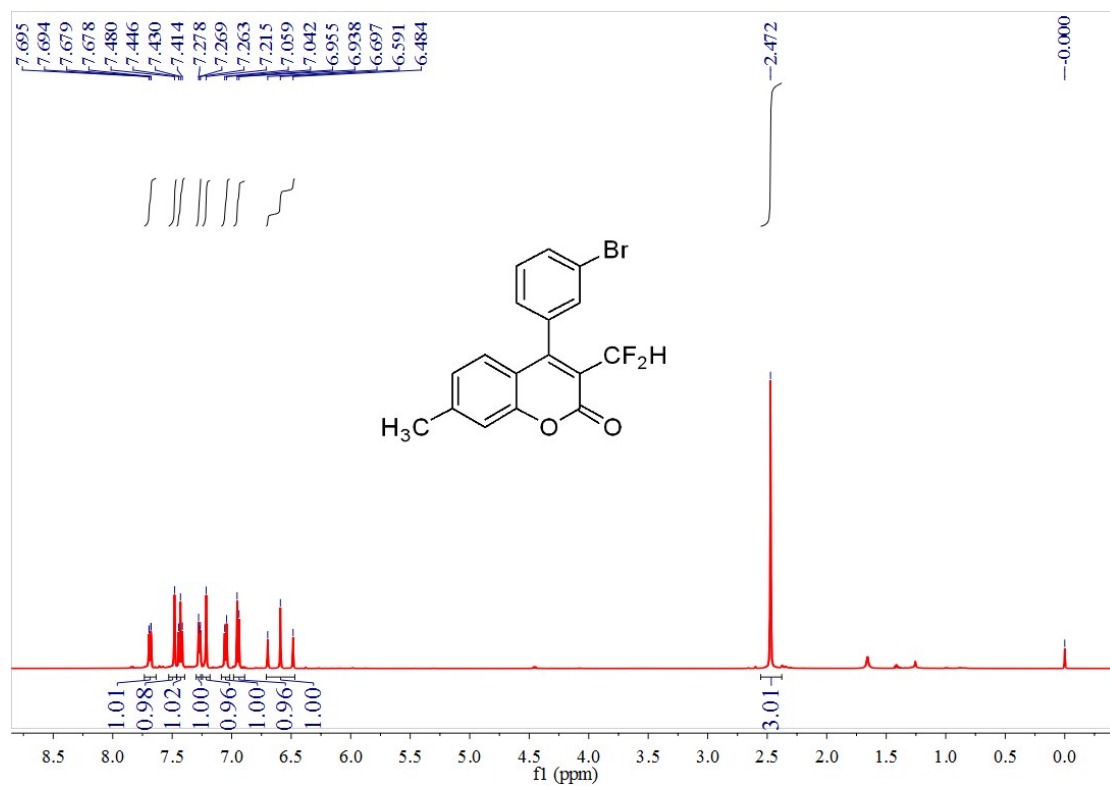

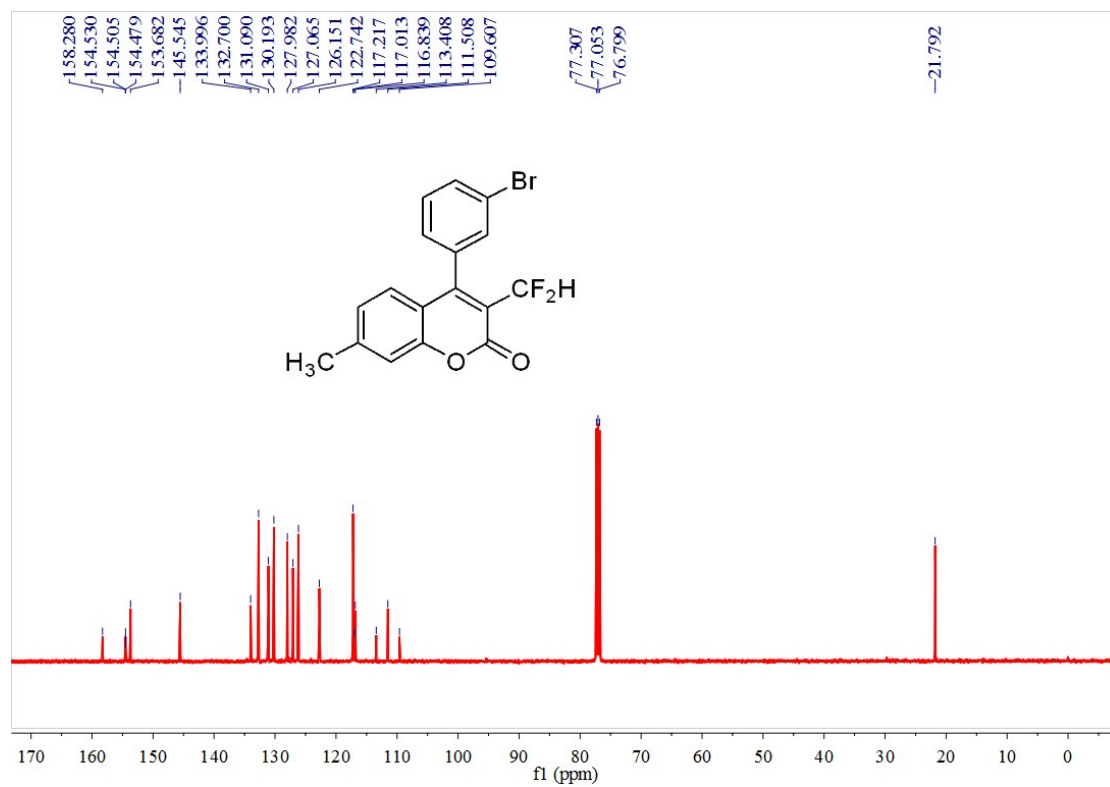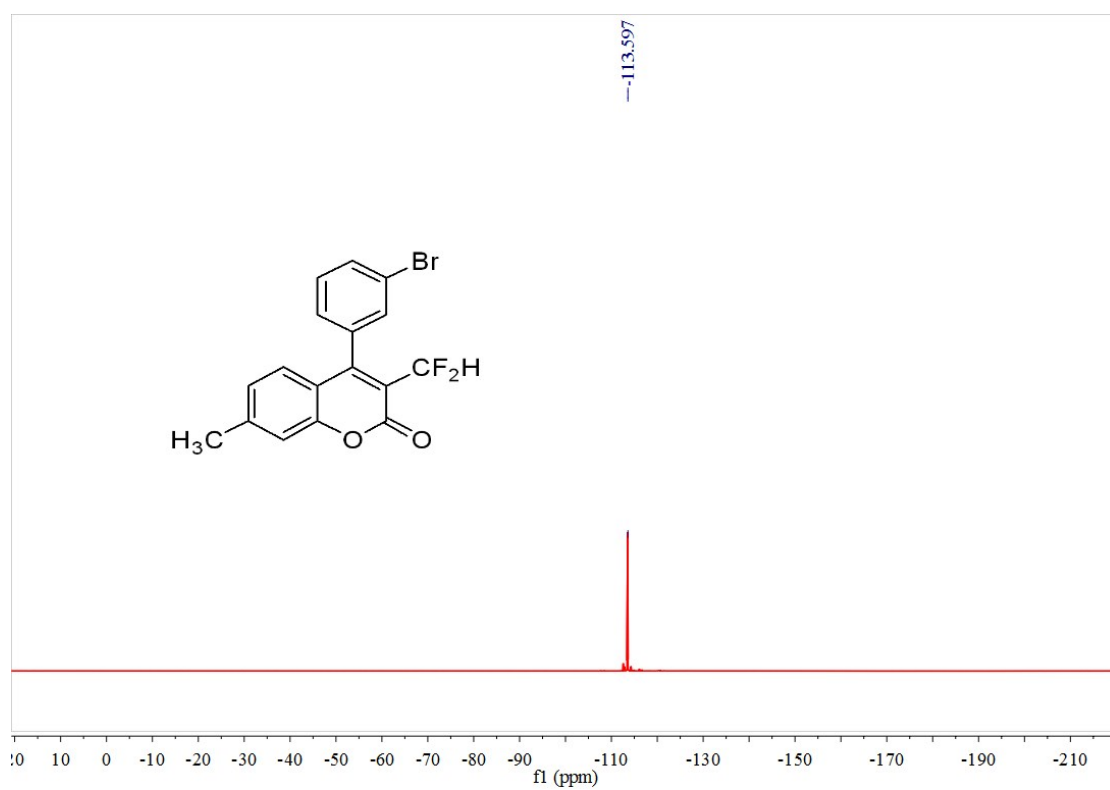

$^1\text{H}$  NMR,  $^{13}\text{C}$  NMR and  $^{19}\text{F}$  NMR spectra of compound **3z**:

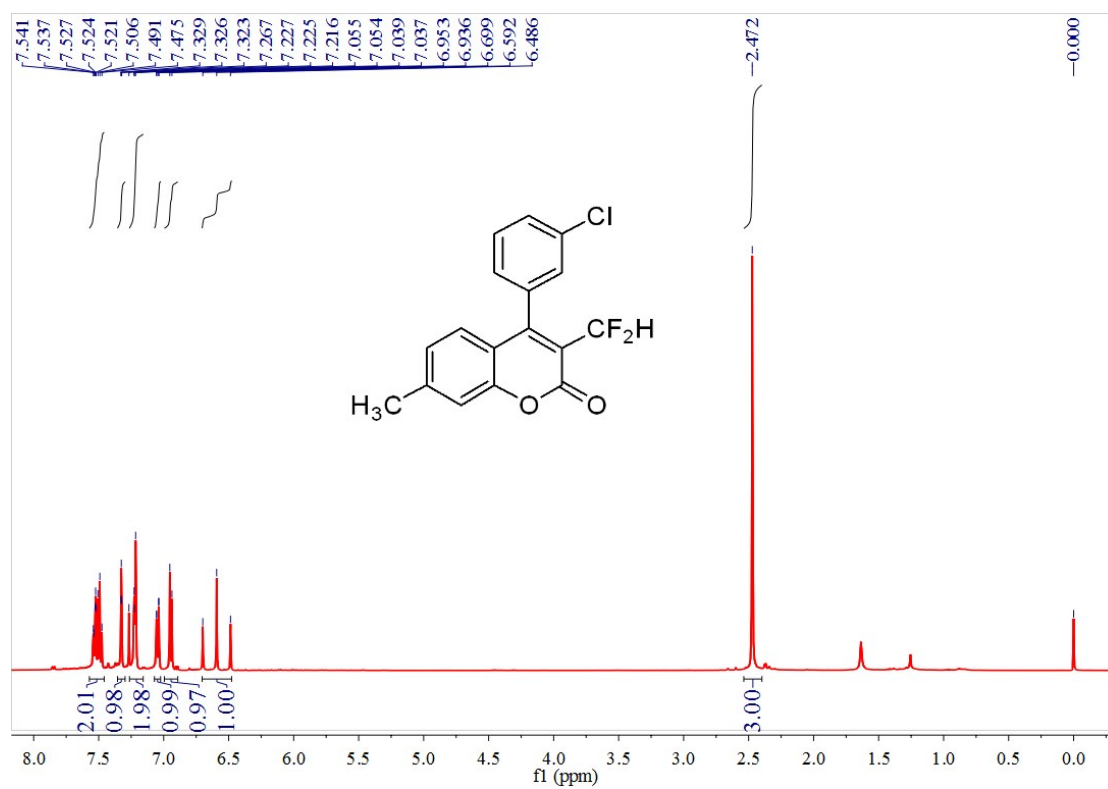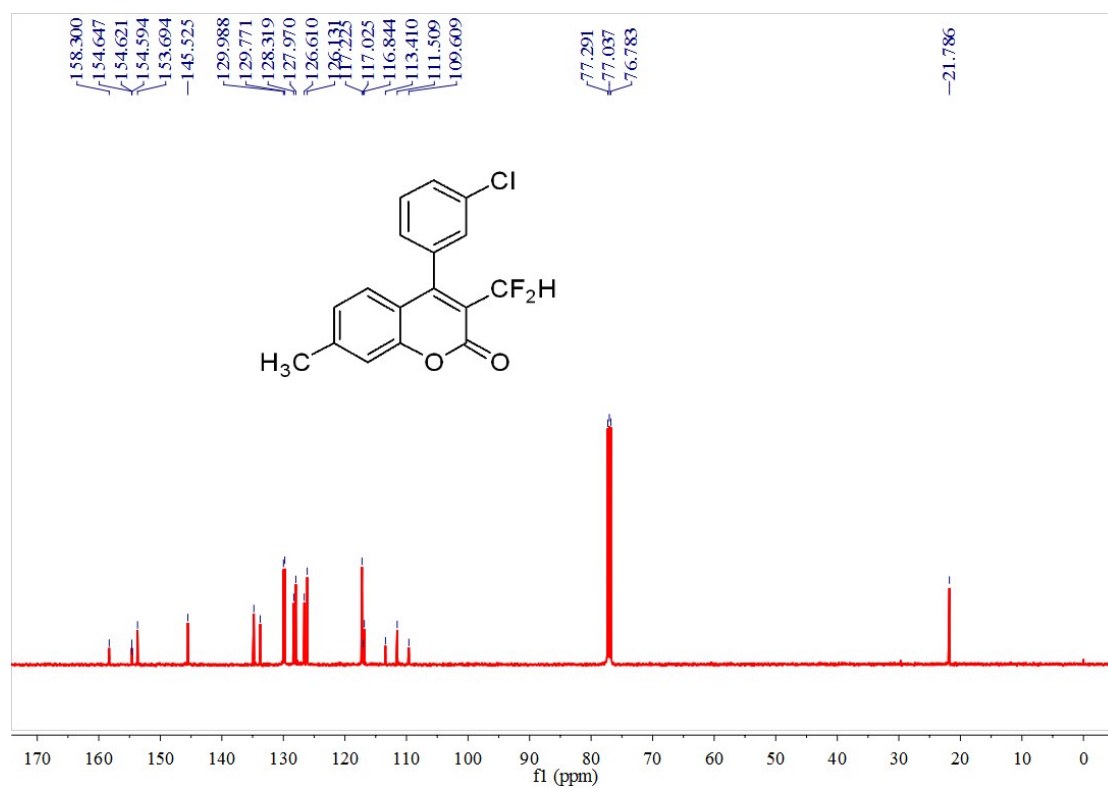

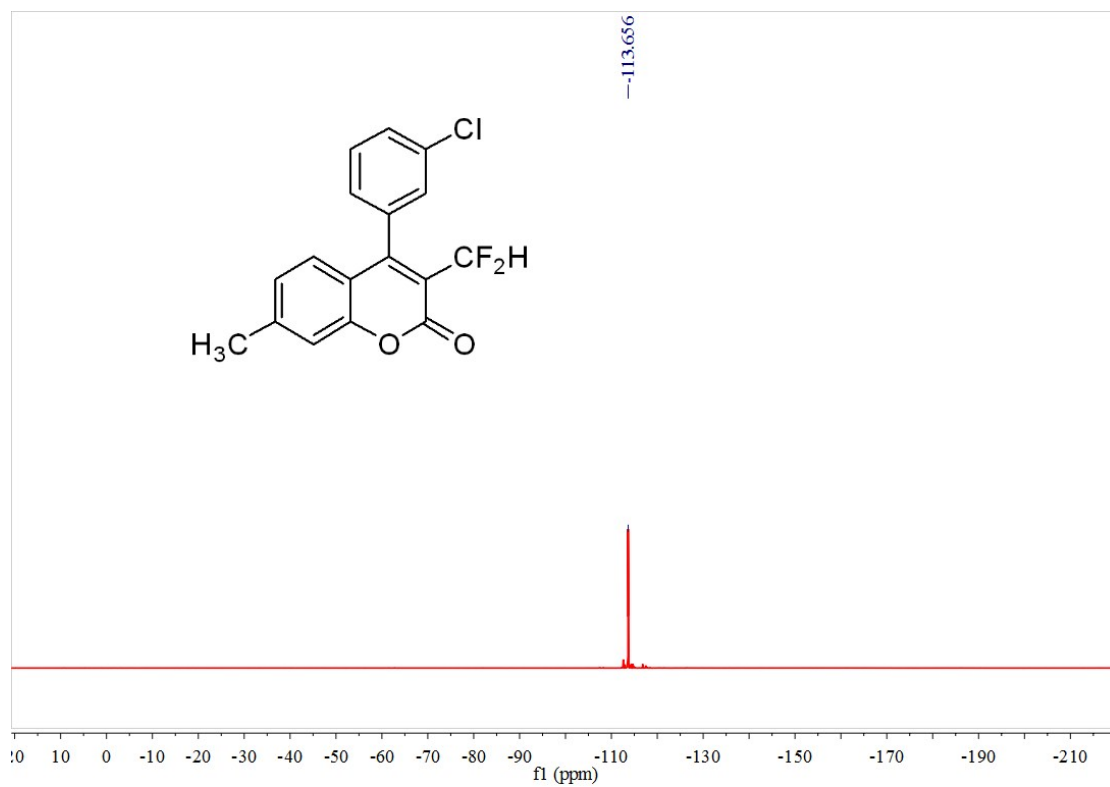

Supplement: c7ob02366a1.pdf [file c7ob02366a1.pdf]
